# Supplementary material for: An easy direct arylation of 5-pyrazolones
Source: publisher site journal article supplement (doi:10.3762/bjoc.9.240), 2013-10-08

# Supporting Information

for

## An easy direct arylation of 5-pyrazolones

Hao Gong<sup>1</sup>, Yiwen Yang<sup>1,2</sup>, Zechao Wang<sup>1</sup> and Chunxiang Kuang\*<sup>1,3</sup>

Address: <sup>1</sup>Department of Chemistry, Tongji University, Siping Road 1239, Shanghai 200092, China, <sup>2</sup>College of Biological, Chemical Sciences and Engineering, Jiaxing University, Jiaxing 314001, China and <sup>3</sup>Key Laboratory of Yangtze River Water Environment, Ministry of Education, Shanghai 200092, China

Email: Chunxiang Kuang\* - kuangcx@tongji.edu.cn.

\* Corresponding author

### Experimental details and characterization data for all compounds

#### Contents

|                                                                                    |    |
|------------------------------------------------------------------------------------|----|
| 1) Experimental procedures.....                                                    | 2  |
| 2) Experimental details and characterization data for 5-pyrazolones <b>1</b> ..... | 2  |
| 3) Experimental details and characterization data for products <b>3</b> .....      | 5  |
| 4) <sup>1</sup> H NMR and <sup>13</sup> C NMR spectra for all compounds .....      | 13 |

## 1. Experimental procedures

All commercially available reagents and solvents were obtained from the commercial providers and used without further purification. Melting points were recorded using a WRS-2A melting point apparatus and were uncorrected. IR spectra were obtained on a Nexus FT-IR spectrophotometer.  $^1\text{H}$  NMR and  $^{13}\text{C}$  NMR spectra were recorded using a Bruker Avance 400 MHz spectrometer. Chemical shifts were reported relative to tetramethylsilane (0.00 ppm) for  $^1\text{H}$  and  $\text{CDCl}_3$  (77.0 ppm) for  $^{13}\text{C}$ . High resolution mass spectra were determined using a Finnigan-NAT GC/MS/DS 8430 spectrometer. Flash column chromatography was performed on 300–400 mesh silica gel. 5-Pyrazolones **1** (except **1a**) were prepared according to literature procedures [1]. 5-Pyrazolone **1a** is a commercially available reagent.

## 2. Experimental details and characterization data for 5-pyrazolones **1**

### 1) Experimental details and characterization data for **1b–l**

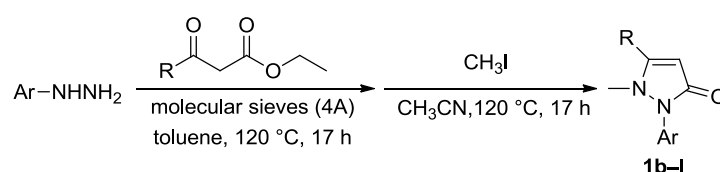

A reaction mixture containing aryl hydrazine (2 mmol), ethyl acetoacetate (2 mmol), molecular sieves (4 Å) and toluene (4 mL) was stirred in the dark in a sealed tube maintained at 120 °C in an oil bath. After 17 h, the reaction mixture was cooled to room temperature. To this mixture, acetonitrile (2 mL) and iodomethane (6 mmol) were added successively and stirred in the dark in the sealed tube maintained at 120 °C for additional 17 h. After the reaction was completed, the mixture was cooled to room temperature. The solvent was then evaporated in vacuo. The resulting residue was purified by flash column chromatography (ethyl acetate) to yield **1b-l**.

### Spectral data of **1b-l**

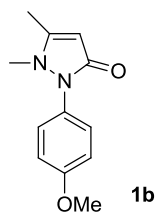

### 2-(4-Methoxyphenyl)-1,5-dimethyl-1H-pyrazol-3(2H)-one(**1b**) [1]:

yellow solid, mp: 124.7–125.8 °C.  $^1\text{H}$  NMR (400 MHz,  $\text{CDCl}_3$ ):  $\delta$  = 7.29 (d,  $J$  = 8.8 Hz, 2H), 6.99 (d,  $J$  = 8.8 Hz, 2H), 5.40 (s, 1H), 3.85 (s, 3H), 3.07 (s, 3H), 2.24 (s, 3H);  $^{13}\text{C}$  NMR (100 MHz,  $\text{CDCl}_3$ ):  $\delta$  = 166.5, 158.8, 154.9, 127.9, 127.0 (2C), 114.6 (2C), 97.9, 55.6, 34.8, 12.9; IR (KBr): 3002, 2823, 1629, 1565, 1552, 1530, 1483, 1452, 1384, 1275  $\text{cm}^{-1}$ ; HR-MS (ESI):  $m/z$  calcd for  $\text{C}_{12}\text{H}_{14}\text{N}_2\text{O}_2$ : 218.1126 [M] $^+$ ; found: 218.1135.

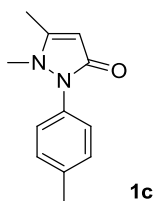

**1,2-Dihydro-2,3-dimethyl-1-p-tolylpyrazol-5-one (1c):**

yellow solid, mp: 147.8-148.6 °C. <sup>1</sup>H NMR (400 MHz, CDCl<sub>3</sub>): δ = 7.25(s, 4H), 5.38 (s, 1H), 3.06 (s, 3H), 2.38 (s, 3H), 2.23 (s, 3H); <sup>13</sup>C NMR (100 MHz, CDCl<sub>3</sub>): δ = 166.4, 155.7, 136.9, 132.6, 129.8 (2C) , 124.7 (2C) , 98.4, 35.1, 21.1, 12.9; IR (KBr): 3060, 2911, 1630, 1565, 1547, 1513, 1483, 1384 cm<sup>-1</sup>; HR-MS (ESI): *m/z* calcd for C<sub>12</sub>H<sub>14</sub>N<sub>2</sub>O: 202.1132 [M]<sup>+</sup>; found: 202.1128.

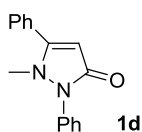

**1,2-Dihydro-2-methyl-1,3-diphenylpyrazol-5-one (1d):**

yellow solid, mp: 157.2-158.5°C. <sup>1</sup>H NMR (400 MHz, CDCl<sub>3</sub>): δ = 7.60-7.45 (m, 9H), 7.29 (t, *J* = 7.2 Hz, 1H), 5.82 (s, 1H), 3.02 (s, 3H); <sup>13</sup>C NMR (100 MHz, CDCl<sub>3</sub>): δ = 165.6, 161.6, 135.2, 130.6, 129.3, 129.2 (2C), 129.1 (2C), 128.4 (2C), 123.7 (2C), 126.5, 100.2, 39.1; IR (KBr): 3087, 2943, 2878, 1630, 1565, 1552, 1513, 1484 cm<sup>-1</sup>; HR-MS (ESI): *m/z* calcd for C<sub>16</sub>H<sub>14</sub>N<sub>2</sub>O: 250.1107 [M]<sup>+</sup>; found: 250.1103.

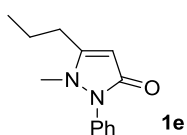

**1-Methyl-2-phenyl-5-propyl-1H-pyrazol-3(2H)-one (1e):**

yellow solid, mp: 62.9-63.7 °C. <sup>1</sup>H NMR (400 MHz, CDCl<sub>3</sub>): δ = 7.43 (t, *J* = 7.8 Hz, 2H), 7.35 (d, *J* = 7.5 Hz, 2H), 7.26 (t, *J* = 7.3 Hz, 1H), 5.39 (s, 1H), 3.03 (s, 3H), 2.47 (t, *J* = 7.6 Hz, 2H), 1.76 -1.64 (m, 2H), 1.04 (t, *J* = 7.4 Hz, 3H); <sup>13</sup>C NMR (100 MHz, CDCl<sub>3</sub>): δ = 166.5, 160.9, 135.2 , 129.2 (2C), 126.61, 124.3 (2C), 97.6, 35.6, 28.9, 20.8, 13.8. IR (KBr): 3085, 2958, 2931, 1658, 1594, 1569, 1454, 1396, 1312, 906, 833 cm<sup>-1</sup>; HR-MS (ESI): *m/z* calcd for C<sub>13</sub>H<sub>16</sub>N<sub>2</sub>O: 216.1261[M]<sup>+</sup>; found: 216.1275.

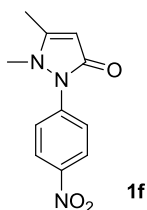

**1,2-Dihydro-2,3-dimethyl-1-(4-nitrophenyl)pyrazol-5-one (1f) [2]:**

tan solid, mp: 164.8-165.6 °C. <sup>1</sup>H NMR (400 MHz, CDCl<sub>3</sub>): δ = 8.30 (d, *J* = 9.2 Hz, 2H), 7.59 (d, *J* = 8.8 Hz, 2H), 5.45 (s, 1H), 3.09 (s, 3H), 2.28 (s, 3H); <sup>13</sup>C NMR (100 MHz, CDCl<sub>3</sub>): δ = 166.4, 160.7, 144.7, 141.1, 124.7 (2C) , 122.2 (2C) , 100.0, 36.7, 13.3; IR (KBr): 3010, 2944, 2893, 1630, 1563, 1530, 1513, 1481, 1352, 1324 cm<sup>-1</sup>; HR-MS (ESI): *m/z* calcd for C<sub>11</sub>H<sub>11</sub>N<sub>3</sub>O<sub>3</sub>: 233.0816 [M]<sup>+</sup>; found: 233.0822.

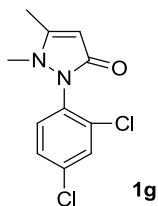

**1-(2,4-Dichlorophenyl)-1,2-dihydro-2,3-dimethylpyrazol-5-one (1g):**

yellow solid, mp: 139.2-140.1°C. <sup>1</sup>H NMR (400 MHz, CDCl<sub>3</sub>): δ = 7.50 (s, 1H), 7.33 (d, *J* = 8.0 Hz, 1H), 7.26 (d, *J* = 8.4 Hz, 1H), 5.28 (s, 1H), 3.02 (s, 3H), 2.20 (s, 3H); <sup>13</sup>C NMR (100 MHz, CDCl<sub>3</sub>): δ = 166.5, 155.1, 135.8, 134.9, 131.6, 131.5, 130.7, 128.1, 96.8, 34.2, 12.9; IR (KBr): 3042, 2930, 2839, 1672, 1599, 1552, 1530, 1481, 1468, 1332, 621 cm<sup>-1</sup>; HR-MS (ESI): *m/z* calcd for C<sub>11</sub>H<sub>10</sub><sup>35</sup>Cl<sub>2</sub>N<sub>2</sub>O: 256.0224 [M]<sup>+</sup>; found: 256.0215.

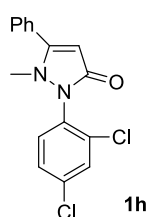

**1-(2,4-Dichlorophenyl)-1,2-dihydro-2-methyl-3-phenylpyrazol-5-one (1h):**

brown solid, mp: 119.6- 120.5°C. <sup>1</sup>H NMR (400 MHz, CDCl<sub>3</sub>): δ = 7.55 (s, 1H), 7.54-7.46 (m, 5H), 7.41 (d, *J* = 8.4 Hz, 1H), 7.37 (d, *J* = 8.4 Hz, 1H), 5.73 (s, 1H), 2.98 (s, 3H); <sup>13</sup>C NMR (100 MHz, CDCl<sub>3</sub>): δ = 165.8, 160.8, 135.7, 134.4, 131.5, 131.2, 130.7, 129.1 (2C), 130.6, 129.0, 128.4 (2C), 128.1, 98.5, 37.6; IR (KBr): 3081, 2969, 1666, 1582, 1550, 1530, 1469, 1384, 841, 735 cm<sup>-1</sup>; HR-MS (ESI): *m/z* calcd for C<sub>16</sub>H<sub>12</sub><sup>35</sup>Cl<sub>2</sub>N<sub>2</sub>O: 318.0321 [M]<sup>+</sup>; found: 318.0316.

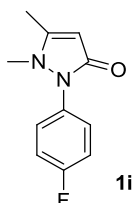

**2-(4-Fluorophenyl)-1,5-dimethyl-1H-pyrazol-3(2H)-one (1i) [1]:**

brown solid, mp: 94.3-95.1°C. <sup>1</sup>H NMR (400 MHz, CDCl<sub>3</sub>): δ = 7.31-7.27 (m, 2H), 7.11 (t, *J* = 8.6 Hz, 2H), 5.29 (s, 1H), 3.08 (s, 3H), 2.25 (s, 3H); <sup>13</sup>C NMR (100 MHz, CDCl<sub>3</sub>): δ = 166.2, 161.4 (d, *J* = 245.7 Hz, 1C), 156.1, 130.8 (d, *J* = 2.8 Hz, 1C), 126.8 (d, *J* = 8.4 Hz, 2C), 116.2 (d, *J* = 22.8 Hz, 2C), 97.7, 35.2, 13.1; IR (KBr): 3111, 3047, 2999, 1651, 1506, 1424, 1348, 836, 821, 770 cm<sup>-1</sup>; HR-MS (ESI): *m/z* calcd for C<sub>11</sub>H<sub>11</sub><sup>19</sup>FN<sub>2</sub>O: 206.0864 [M]<sup>+</sup>; found: 206.0854

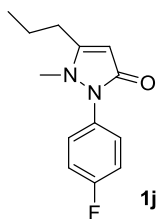

**2-(4-Fluorophenyl)-1-methyl-5-propyl-1H-pyrazol-3(2H)-one (1j) :**

tan solid, mp: 95.8-96.7°C.  $^1\text{H}$  NMR (400 MHz,  $\text{CDCl}_3$ ):  $\delta$  = 7.35-7.30 (m, 2H), 7.12 (t,  $J$  = 8.6 Hz, 2H), 5.37 (s, 1H), 3.02 (s, 3H), 2.46 (t,  $J$  = 7.6 Hz, 2H), 1.76 – 1.64 (m, 2H), 1.03 (t,  $J$  = 7.4 Hz, 3H);  $^{13}\text{C}$  NMR (100 MHz,  $\text{CDCl}_3$ ):  $\delta$  = 166.6, 161.13, 161.12 (d,  $J$  = 245.1 Hz, 1C), 131.2 (d,  $J$  = 2.8 Hz, 1C), 126.3 (d,  $J$  = 8.5 Hz, 2C), 116.1 (d,  $J$  = 22.7 Hz, 2C), 97.5, 35.5, 28.8, 20.8, 13.7; IR (KBr): 3050, 2962, 1661, 1602, 1505, 1422, 1333, 962, 836, 811, 780  $\text{cm}^{-1}$ ; HR-MS (ESI):  $m/z$  calcd for  $\text{C}_{13}\text{H}_{15}^{19}\text{FN}_2\text{O}$ : 234.1157[M] $^+$ ; found: 234.1165.

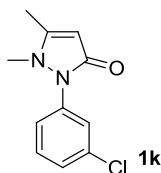

**1-(3-Chlorophenyl)-1,2-dihydro-2,3-dimethylpyrazol-5-one (1k) [1]:**

gray solid, mp: 104.3-105.9°C.  $^1\text{H}$  NMR (400 MHz,  $\text{CDCl}_3$ ):  $\delta$  = 7.40 (s, 1H), 7.39 (t,  $J$  = 7.8 Hz, 1H), 7.33 (d,  $J$  = 8.0 Hz, 1H), 7.26 (d,  $J$  = 7.6 Hz, 1H), 5.42 (s, 1H), 3.07 (s, 3H), 2.26 (s, 3H);  $^{13}\text{C}$  NMR (100 MHz,  $\text{CDCl}_3$ ):  $\delta$  = 166.5, 158.1, 136.6, 134.8, 130.1, 126.4, 123.6, 121.9, 99.2, 35.9, 13.1; IR (KBr): 3025, 2971, 1630, 1582, 1548, 1513, 1483, 1451, 1384, 769  $\text{cm}^{-1}$ ; HR-MS (ESI):  $m/z$  calcd for  $\text{C}_{11}\text{H}_{11}^{35}\text{ClN}_2\text{O}$ : 222.0612 [M] $^+$ ; found: 222.0608.

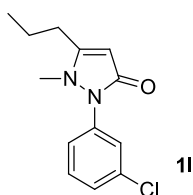

**2-(3-Chlorophenyl)-1-methyl-5-propyl-1H-pyrazol-3(2H)-one (1l):**

yellow solid, mp: 63.4-64.1°C.  $^1\text{H}$  NMR (400 MHz,  $\text{CDCl}_3$ ):  $\delta$  = 7.37 (t,  $J$  = 7.8 Hz, 2H), 7.29 (d,  $J$  = 8.4 Hz, 1H), 7.23 (d,  $J$  = 7.5 Hz, 1H), 5.39 (s, 1H), 3.04 (s, 3H), 2.47 (t,  $J$  = 7.6 Hz, 2H), 1.76-1.65 (m, 2H), 1.04 (t,  $J$  = 7.3 Hz, 3H);  $^{13}\text{C}$  NMR (100 MHz,  $\text{CDCl}_3$ ):  $\delta$  = 166.6, 162.5, 136.5, 134.7, 130.1, 126.4, 123.7, 121.9, 98.1, 36.0, 28.9, 20.8, 13.8; IR (KBr): 3072, 2987, 1655, 1573, 1531, 1465, 1432, 1314, 972, 894, 778  $\text{cm}^{-1}$ ; HR-MS (ESI):  $m/z$  calcd for  $\text{C}_{13}\text{H}_{15}^{35}\text{ClN}_2\text{O}$ : 250.0865 [M] $^+$ ; found: 250.0857.

**3. Experimental details and characterization data for products 3**

A mixture of 5-pyrazolones **1** (0.3 mmol), aryl halides (0.6 mmol),  $\text{Pd}(\text{OAc})_2$  (0.03 mmol) and  $\text{Ag}_2\text{CO}_3$  (0.6 mmol) in 2 mL MeCN was placed in a sealed tube. The tube was heated at 90 °C for 12 h using an oil bath. After the reaction was completed (as monitored by TLC), the mixture was cooled to room temperature, and then concentrated under reduced pressure to afford a crude product.

Purification by column chromatography on silica gel (EtOAc) to yield 4-aryl-5-pyrazolones **3**.

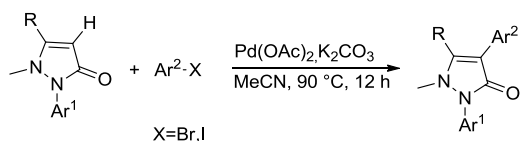

### Spectral data of **3**

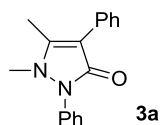

#### 1,2-Dihydro-2,3-dimethyl-1,4-diphenylpyrazol-5-one (**3a**):

light yellow solid. mp:160.0-160.8 °C. <sup>1</sup>H NMR (400MHz, CDCl<sub>3</sub>): δ = 7.57 (d, *J* = 7.6 Hz, 2H), 7.49 (d, *J* = 4.4 Hz, 4H), 7.42 (t, *J* = 7.8 Hz, 2H), 7.34-7.29 (m, 2H), 3.17 (s, 3H), 2.40 (s, 3H); <sup>13</sup>C NMR (100MHz, CDCl<sub>3</sub>): δ = 164.6, 152.2, 135.3, 131.3, 129.1(2C), 128.9 (2C), 128.3 (2C), 126.8, 126.5, 124.1(2C), 111.2, 36.0, 12.1; IR (KBr): 3158, 3086, 3050, 1598, 1527, 1514, 1501, 1465, 1457, 1384, 1338, 1064, 994, 957, 855, 791, 757, 703, 685 cm<sup>-1</sup>; HR-MS: *m/z* calcd for C<sub>17</sub>H<sub>16</sub>N<sub>2</sub>O: 264.1284 [M]<sup>+</sup>; found: 264.1276.

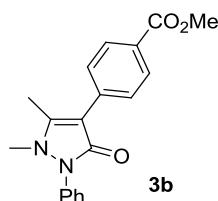

#### Methyl 4-(1,5-dimethyl-3-oxo-2-phenyl-2,3-dihydro-1H-pyrazol-4-yl)benzoate (**3b**):

yellow solid. mp 148.2-149.3 °C. <sup>1</sup>H NMR (400 MHz, CDCl<sub>3</sub>): δ = 8.90 (d, *J* = 8.4 Hz, 2H), 7.68 (d, *J* = 8.4 Hz, 2H), 7.52-7.45 (m, 4H), 7.34(t, *J* = 7.2 Hz, 1H), 3.94 (s, 3H), 3.20 (s, 3H), 2.42 (s, 3H); <sup>13</sup>C NMR (100 MHz, CDCl<sub>3</sub>): δ = 167.1, 164.1, 152.2, 136.5, 135.0, 129.6 (2C), 129.2 (2C), 128.3 (2C), 127.9, 126.9, 124.4 (2C), 109.54, 52.1, 35.8, 12.3; IR (KBr): 3064, 3028, 1716, 1651, 1608, 1588, 1453, 1376, 1344, 1056, 962, 890, 861, 760, 709, 699 cm<sup>-1</sup>; HR-MS: *m/z* calcd for C<sub>19</sub>H<sub>18</sub>N<sub>2</sub>O<sub>3</sub>: 322.1324[M]<sup>+</sup>; found: 322.1319.

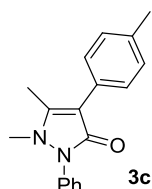

#### 1,5-Dimethyl-2-phenyl-4-(*p*-tolyl)-1H-pyrazol-3(2H)-one (**3c**):

white solid. mp 148.9-149.7 °C. <sup>1</sup>H NMR (400 MHz, CDCl<sub>3</sub>): δ = 7.49-7.48 (m, 4H), 7.46 (d, *J* = 8.0 Hz, 2H), 7.31 (t, *J* = 3.6 Hz, 1H), 7.24 (d, *J* = 8.0 Hz, 2H), 3.15 (s, 3H), 2.38 (s, 6H). <sup>13</sup>C NMR (100 MHz, CDCl<sub>3</sub>) δ = 164.7, 152.2, 136.4, 135.5, 129.1 (2C), 129.0 (2C), 128.8 (2C), 128.3, 126.3, 123.9 (2C), 111.4, 36.2, 21.3, 12.2. IR (KBr): 3100, 3056, 1650, 1590, 1510, 1494, 1456, 1372,

1345, 1056, 912, 889, 827, 782, 695  $\text{cm}^{-1}$ ; HR-MS:  $m/z$  calcd for  $\text{C}_{18}\text{H}_{18}\text{N}_2\text{O}$ : 278.1422  $[\text{M}]^+$ ; found: 278.1428.

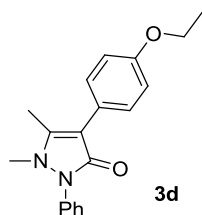

**4-(4-Ethoxyphenyl)-1,5-dimethyl-2-phenyl-1H-pyrazol-3(2H)-one (3d):**

light yellow solid. mp: 158.2-158.9  $^{\circ}\text{C}$ .  $^1\text{H}$  NMR (400 MHz,  $\text{CDCl}_3$ ):  $\delta$  = 7.49-7.48 (m, 6H), 7.32-7.29 (m, 1H), 6.96 (d,  $J$  = 8.4 Hz, 2H), 4.07 (q,  $J$  = 6.8 Hz, 2H), 3.14 (s, 3H), 2.38 (s, 3H), 1.4 (t,  $J$  = 6.8 Hz, 3H);  $^{13}\text{C}$  NMR (100 MHz,  $\text{CDCl}_3$ ):  $\delta$  = 164.8, 157.8, 152.0, 135.5, 130.5 (2C) 129.1 (2C), 126.3, 123.8 (2C), 123.4, 114.5 (2C), 111.3, 63.4, 36.2, 14.9, 12.2; IR (KBr): 3132, 3066, 1651, 1613, 1558, 1533, 1491, 1435, 1389, 1344, 971, 936, 850, 782, 713  $\text{cm}^{-1}$ ; HR-MS:  $m/z$  calcd for  $\text{C}_{19}\text{H}_{20}\text{N}_2\text{O}_2$ : 308.1532  $[\text{M}]^+$ ; found: 308.1527

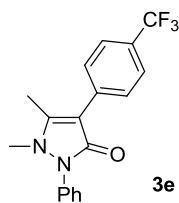

**1,5-Dimethyl-2-phenyl-4-(4-(trifluoromethyl)phenyl)-1H-pyrazol-3(2H)-one (3e):**

white solid. mp: 162.7-163.2  $^{\circ}\text{C}$ .  $^1\text{H}$  NMR (400 MHz,  $\text{CDCl}_3$ ):  $\delta$  = 7.72-7.66 (m, 4H), 7.52-7.45 (m, 4H), 7.34 (t,  $J$  = 6.8 Hz, 1H), 3.21 (s, 3H), 2.43 (s, 3H);  $^{13}\text{C}$  NMR (100 MHz,  $\text{CDCl}_3$ ):  $\delta$  = 164.1, 152.1, 135.2, 134.9, 129.2 (2C), 128.8 (2C), 128.4 (q,  $J$  = 64.1 Hz, 1C), 126.9 (2C), 125.2 (q,  $J$  = 5.7 Hz, 2C), 124.4, 124.3 (q,  $J$  = 270.1 Hz, 1C), 109.3, 36.7, 12.2; IR (KBr): 3071, 3024, 1646, 1616, 1591, 1496, 1458, 1404, 1376, 1324, 914, 855, 805, 751, 698  $\text{cm}^{-1}$ ; HR-MS:  $m/z$  calcd for  $\text{C}_{18}\text{H}_{15}\text{F}_3\text{N}_2\text{O}$ : 332.1145  $[\text{M}]^+$ ; found: 332.1138.

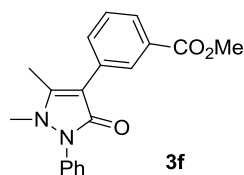

**Methyl 3-(1,5-dimethyl-3-oxo-2-phenyl-2,3-dihydro-1H-pyrazol-4-yl)benzoate (3f):**

yellow solid. mp: 149.5-150.4  $^{\circ}\text{C}$ ;  $^1\text{H}$  NMR (400 MHz,  $\text{CDCl}_3$ ):  $\delta$  = 8.20 (s, 1H), 7.97 (d,  $J$  = 8.0 Hz, 1H), 7.84 (d,  $J$  = 8.0 Hz, 1H), 7.52-7.47 (m, 5H), 7.34-7.29 (m, 1H), 3.93 (s, 3H), 3.19 (s, 3H), 2.42 (s, 3H);  $^{13}\text{C}$  NMR (100 MHz,  $\text{CDCl}_3$ ):  $\delta$  = 167.2, 164.4, 152.4, 135.2, 133.4, 131.8, 130.2, 129.7, 129.2 (2C), 128.5, 127.8, 126.6, 124.2 (2C), 110.0, 52.1, 35.9, 12.2; IR (KBr): 3060, 3027, 2945, 1723, 1649, 1581, 1488, 1414, 1325, 1306, 964, 879, 763, 694  $\text{cm}^{-1}$ ; HR-MS:  $m/z$  calcd for  $\text{C}_{19}\text{H}_{18}\text{F}_3\text{N}_2\text{O}_3$ : 322.1319  $[\text{M}]^+$ ; found: 322.1322.

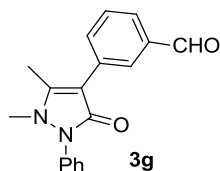

**3-(1,5-Dimethyl-3-oxo-2-phenyl-2,3-dihydro-1H-pyrazol-4-yl)benzaldehyde (3g):**

yellow solid, mp: 179.1-180.6 °C. <sup>1</sup>H NMR (400 MHz, CDCl<sub>3</sub>): δ = 10.07 (s, 1H), 8.09 (s, 1H), 7.91(d, *J* = 7.6 Hz, 1H), 7.82 (d, *J* = 7.6 Hz, 1H), 7.59(t, *J* = 8.0 Hz, 1H), 7.53-7.46 (m, 4H), 7.34 (t, *J* = 7.2 Hz, 1H), 3.22 (s, 3H), 2.45 (s, 3H). <sup>13</sup>C NMR (100 MHz, CDCl<sub>3</sub>): δ = 192.5, 164.3, 152.2, 136.5, 134.9, 134.7, 132.6, 130.3, 129.2 (2C), 129.1, 127.5, 126.9, 124.3 (2C), 103.3, 35.8, 12.2; IR (KBr): 3088, 3013, 1787, 1764, 1692, 1658, 1649, 1582, 1565, 1529, 1432, 945, 887, 763, 683 cm<sup>-1</sup>; HR-MS: m/z calcd for C<sub>18</sub>H<sub>16</sub>N<sub>2</sub>O<sub>2</sub>: 292.1216 [M]<sup>+</sup>; found: 292.1221

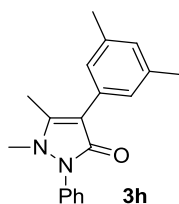

**4-(3,5-Dimethylphenyl)-1,5-dimethyl-2-phenyl-1H-pyrazol-3(2H)-one (3h):**

yellow solid. mp: 207.0-207.8°C. <sup>1</sup>H NMR (400 MHz, CDCl<sub>3</sub>): δ = 7.49-7.48 (m, 4H), 7.32-7.29 (m, 1H), 7.18 (s, 2H), 6.96 (s, 1H), 3.14 (s, 3H), 2.38 (s, 3H), 2.36 (s, 6H); <sup>13</sup>C NMR (100 MHz, CDCl<sub>3</sub>): δ = 164.7, 152.5, 137.7 (2C), 135.5, 131.0, 129.0 (2C), 128.5, 126.7 (2C), 126.3, 123.8 (2C), 111.5, 36.2, 21.4 (2C), 12.2; IR (KBr): 3084, 3053, 3013, 1655, 1620, 1592, 1468, 1455, 1373, 1323, 880, 855, 758, 700 cm<sup>-1</sup>; HR-MS: m/z calcd for C<sub>19</sub>H<sub>20</sub>N<sub>2</sub>O: 292.1566 [M]<sup>+</sup>; found: 292.1558

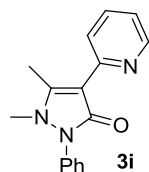

**1,5-Dimethyl-2-phenyl-4-(pyridin-2-yl)-1H-pyrazol-3(2H)-one (3i):**

yellow solid. mp: 101.0-101.9 °C. <sup>1</sup>H NMR (400 MHz, CDCl<sub>3</sub>): δ = 8.59 (d, *J* = 4.4 Hz, 1H), 8.31 (d, *J* = 8.0 Hz, 1H), 7.72-7.69 (m, 1H), 7.53-7.43 (m, 4H), 7.35 (t, *J* = 7.2 Hz, 1H), 7.13-7.10(m, 1H) 3.25(s, 3H), 2.78(s, 3H); <sup>13</sup>C NMR (100 MHz, CDCl<sub>3</sub>): δ = 164.6, 154.5, 152.4, 148.5, 136.2, 135.0, 129.2 (2C), 127.1, 124.9 (2C), 122.5, 120.7, 107.5, 35.1, 12.8; IR (KBr): 3150, 3027, 1754, 1737, 1581, 1529, 1493, 1468, 1366, 1330, 879, 752, 712 cm<sup>-1</sup>; HR-MS: m/z calcd for C<sub>16</sub>H<sub>15</sub>N<sub>3</sub>O: 265.1219 [M]<sup>+</sup>; found: 265.1216



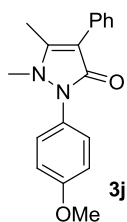

**2-(4-Methoxyphenyl)-1,5-dimethyl-4-phenyl-1H-pyrazol-3(2H)-one (3j):**

tan solid. mp: 134.4-135.1 °C. <sup>1</sup>H NMR (400 MHz, CDCl<sub>3</sub>): δ = 7.57 (d, *J* = 7.2 Hz, 2H), 7.42-7.37 (m, 4H), 7.31 (s, 1H), 7.03-7.02 (m, 2H), 3.86 (s, 3H), 3.18 (s, 3H), 2.39 (s, 3H); <sup>13</sup>C NMR (100 MHz, CDCl<sub>3</sub>): δ = 164.6, 158.5, 150.9, 131.5, 128.8 (2C), 128.3 (2C), 128.1, 126.6, 126.5 (2C), 114.5 (2C), 110.6, 55.6, 35.5, 12.1; IR (KBr): 3060, 3035, 1660, 1622, 1592, 1510, 1454, 1335, 836, 807, 704, 670cm<sup>-1</sup>; HR-MS: *m/z* calcd for C<sub>18</sub>H<sub>18</sub>N<sub>2</sub>O<sub>2</sub>: 294.1365 [M]<sup>+</sup>; found: 294.1372

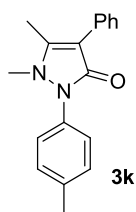

**1,5-Dimethyl-4-phenyl-2-(*p*-tolyl)-1H-pyrazol-3(2H)-one (3k):**

yellow solid. mp: 157.3-158.2 °C. <sup>1</sup>H NMR (400 MHz, CDCl<sub>3</sub>): δ = 7.57 (d, *J* = 7.2 Hz, 2H), 7.42 (t, *J* = 7.6 Hz, 2H), 7.35 (d, *J* = 8.0 Hz, 2H), 7.30-7.28 (m, 3H), 3.15 (s, 3H), 2.40 (s, 3H), 2.39 (s, 3H); <sup>13</sup>C NMR (100 MHz, CDCl<sub>3</sub>): δ = 164.5, 151.6, 136.5, 132.7, 131.4, 129.7 (2C), 128.9 (2C), 128.3 (2C), 126.6, 124.3 (2C), 110.9, 35.8, 21.1, 12.1; IR (KBr): 3078, 3048, 1654, 1609, 1511, 1487, 1418, 1303, 935, 881, 803, 778, 741, 669 cm<sup>-1</sup>; HR-MS: *m/z* calcd for C<sub>18</sub>H<sub>18</sub>N<sub>2</sub>O: 278.1432 [M]<sup>+</sup>; found: 278.1439.

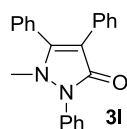

**1-Methyl-2,4,5-triphenyl-1H-pyrazol-3(2H)-one (3l) :**

yellow solid. mp: 108.8-109.7 °C. <sup>1</sup>H NMR (400 MHz, CDCl<sub>3</sub>): δ = 7.64 (d, *J* = 7.2 Hz, 2H), 7.50 (t, *J* = 8.0 Hz, 3H), 7.48-7.44 (m, 6H), 7.32 (t, *J* = 7.2 Hz, 1H), 7.26 (t, *J* = 7.6 Hz, 2H), 7.20 (t, *J* = 7.2 Hz, 1H), 2.97 (s, 3H); <sup>13</sup>C NMR (100 MHz, CDCl<sub>3</sub>): δ = 164.2, 155.9, 135.4, 130.6, 130.2, 129.6 (2C), 129.5, 129.2(2C), 129.1 (2C), 128.9 (2C), 128.1 (2C), 126.7, 126.4, 123.6 (2C), 112.2, 38.7; IR (KBr): 3056, 2924, 1667, 1592, 1494, 1447, 1393, 1342, 911, 879, 803, 755, 695 cm<sup>-1</sup>; HR-MS: *m/z* calcd for C<sub>22</sub>H<sub>18</sub>N<sub>2</sub>O: 326.1425 [M]<sup>+</sup>; found: 326.1418.

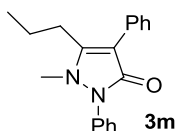

**1-Methyl-2,4-diphenyl-5-propyl-1H-pyrazol-3(2H)-one (3m):**

yellow solid. mp: 116.5-117.2 °C. <sup>1</sup>H NMR (400 MHz, CDCl<sub>3</sub>): δ = 7.53 (d, *J* = 7.2 Hz, 2H), 7.49 (d, *J* = 4.4 Hz, 4H), 7.42(t, *J* = 7.6 Hz, 2H), 7.32-7.29(m, 2H), 3.15 (s, 3H), 2.71 (t, *J* = 7.6 Hz, 2H), 1.77(q, *J* = 7.6 Hz, 2H), 1.07(t, *J* = 7.2 Hz, 3H); <sup>13</sup>C NMR (100 MHz, CDCl<sub>3</sub>): δ = 164.8, 156.6, 135.4, 131.3, 129.1 (2C), 129.0 (2C), 128.4 (2C), 126.8, 126.4, 123.9 (2C), 111.6, 36.3, 27.4, 22.4, 14.0; IR (KBr): 3076, 3012, 1637, 1615, 1572, 1478, 1384, 1011, 972, 879, 724, 687 cm<sup>-1</sup>; HR-MS: m/z calcd for C<sub>19</sub>H<sub>20</sub>N<sub>2</sub>O: 292.1627 [M]<sup>+</sup>; found: 292.1622.

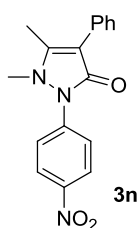

**1,5-Dimethyl-2-(4-nitrophenyl)-4-phenyl-1H-pyrazol-3(2H)-one (3n) :**

yellow solid. mp: 165.5-166.3 °C. <sup>1</sup>H NMR (400 MHz, CDCl<sub>3</sub>): δ = 8.37 (d, *J* = 9.2 Hz, 2H), 7.72 (d, *J* = 9.2, 2H), 7.53-7.51 (m, 2H), 7.45 (t, *J* = 7.6, 2H), 7.34 (t, *J* = 7.5 Hz, 1H), 3.19 (s, 3H), 2.40 (s, 3H); <sup>13</sup>C NMR (100 MHz, CDCl<sub>3</sub>): δ = 164.9, 155.8, 144.7, 144.1, 130.2, 128.9 (2C), 128.5 (2C), 127.4, 124.8 (2C), 122.1 (2C), 122.7, 37.3, 12.4; IR (KBr): 3111, 3077, 1661, 1639, 1616, 1588, 1514, 1491, 1412, 1339, 1054, 859, 748, 706 cm<sup>-1</sup>; HR-MS: m/z calcd for C<sub>17</sub>H<sub>15</sub>N<sub>3</sub>O<sub>3</sub>: 309.1089 [M]<sup>+</sup>; found: 309.1096.

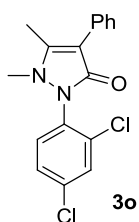

**2-(2,4-Dichlorophenyl)-1,5-dimethyl-4-phenyl-1H-pyrazol-3(2H)-one (3o):**

yellow solid. mp: 179.8-180.5 °C; <sup>1</sup>H NMR (400 MHz, CDCl<sub>3</sub>): δ = 7.58-7.57(m, 3H), 7.42 (t, *J* = 7.7 Hz, 2H), 7.38 (d, *J* = 2.1 Hz, 1H), 7.35 (d, *J* = 8.4 Hz, 1H), 7.32-7.25 (m, 1H), 3.12 (s, 3H), 2.40 (s, 3H); <sup>13</sup>C NMR (100 MHz, CDCl<sub>3</sub>): δ = 164.7, 151.2, 135.6, 134.8, 131.9, 131.3, 131.2, 130.7, 128.8 (2C), 128.4 (2C), 128.1, 126.7, 109.6, 34.8, 12.1; IR (KBr): 3083, 3027, 1661, 1607, 1579, 1474, 1415, 1388, 1307, 837, 821, 759, 702, 667 cm<sup>-1</sup>; HR-MS: m/z calcd for C<sub>17</sub>H<sub>14</sub><sup>35</sup>Cl<sub>2</sub>N<sub>2</sub>O: 332.0489 [M]<sup>+</sup>; found: 332.0478.

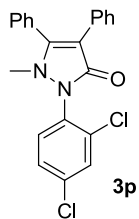

**2-(2,4-Dichlorophenyl)-1-methyl-4,5-diphenyl-1H-pyrazol-3(2H)-one (3p):**

yellow solid. mp: 149.8-150.7 °C. <sup>1</sup>H NMR (400 MHz, CDCl<sub>3</sub>): δ = 7.62 (d, *J* = 2.1 Hz, 1H), 7.53-7.39 (m, 9H), 7.25 (t, *J* = 7.3 Hz, 2H), 7.18 (t, *J* = 7.2 Hz, 1H), 2.92 (s, 3H); <sup>13</sup>C NMR (100 MHz, CDCl<sub>3</sub>): δ = 164.4, 155.3, 135.6, 134.4, 131.8, 131.0, 130.8, 130.5, 130.3, 129.6 (2C), 129.3, 129.2 (2C), 128.8 (2C), 128.1 (3C), 126.6, 110.6, 37.2; IR (KBr): 3062, 3031, 1667, 1639, 1581, 1480, 1441, 1415, 1396, 1315, 1022, 924, 880, 825, 783, 716 cm<sup>-1</sup>; HR-MS: *m/z* calcd for C<sub>22</sub>H<sub>16</sub><sup>35</sup>Cl<sub>2</sub>N<sub>2</sub>O: 394.0638 [M]<sup>+</sup>; found: 394.0631.

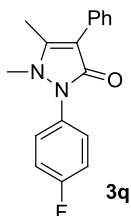

**2-(4-Fluorophenyl)-1,5-dimethyl-4-phenyl-1H-pyrazol-3(2H)-one (3q):**

yellow solid. mp: 149.3-150.3 °C. <sup>1</sup>H NMR (400 MHz, CDCl<sub>3</sub>): δ = 7.56 (d, *J* = 7.3 Hz, 2H), 7.44 (m, 4H), 7.31 (d, *J* = 7.4 Hz, 1H), 7.19 (t, *J* = 8.6 Hz, 2H), 3.15 (s, 3H), 2.40 (s, 3H); <sup>13</sup>C NMR (100 MHz, CDCl<sub>3</sub>): δ = 164.8, 161.1 (d, *J* = 246.4 Hz, 1C), 152.5, 131.4, 131.1, 128.9 (2C), 128.4 (2C), 126.8, 125.9 (d, *J* = 8.5 Hz, 2C), 116.1 (d, *J* = 22.7 Hz, 2C), 111.3, 36.0, 12.2; IR (KBr): 3065, 3021, 1654, 1603, 1503, 1438, 1340, 1307, 1011, 881, 786, 763, 702 cm<sup>-1</sup>; HR-MS: *m/z* calcd for C<sub>17</sub>H<sub>15</sub><sup>19</sup>F<sub>2</sub>N<sub>2</sub>O: 282.1174 [M]<sup>+</sup>; found: 282.1171.

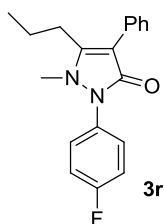

**2-(4-Fluorophenyl)-1-methyl-4-phenyl-5-propyl-1H-pyrazol-3(2H)-one (3r):**

yellow solid. mp: 106.2-107.1 °C. <sup>1</sup>H NMR (400 MHz, CDCl<sub>3</sub>): δ = 7.51 (d, *J* = 7.4 Hz, 2H), 7.48-7.39 (m, 4H), 7.32 (d, *J* = 7.3 Hz, 1H), 7.18 (t, *J* = 8.6 Hz, 2H), 3.13 (s, 3H), 2.71 (t, *J* = 8.0 Hz, 2H), 1.76 (m, 2H), 1.07 (t, *J* = 7.2 Hz, 3H); <sup>13</sup>C NMR (100 MHz, CDCl<sub>3</sub>): δ = 165.0, 161.0 (d, *J* = 246.3 Hz, 1C), 156.8, 131.5, 131.2, 129.0 (2C), 128.4 (2C), 126.9, 125.8 (d, *J* = 8.4 Hz, 2C), 116.0 (d, *J* = 22.8 Hz, 2C), 111.6, 36.2, 27.4, 22.4, 14.03; IR (KBr): 3051, 3014, 1649, 1603, 1582, 1457, 1414, 1322, 1017, 913, 837, 826, 743, 702 cm<sup>-1</sup>; HR-MS: *m/z* calcd for C<sub>19</sub>H<sub>19</sub><sup>19</sup>FN<sub>2</sub>O: 310.1472 [M]<sup>+</sup>; found: 310.1481.

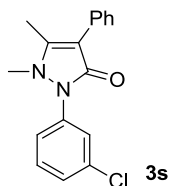

**2-(3-Chlorophenyl)-1,5-dimethyl-4-phenyl-1H-pyrazol-3(2H)-one (3s):**

yellow solid. mp: 203.6-204.3 °C. <sup>1</sup>H NMR (400 MHz, CDCl<sub>3</sub>): δ = 7.54 (d, *J* = 7.4 Hz, 2H), 7.51 (s, 1H), 7.45-7.41(m, 4H), 7.33-7.26 (m, 2H), 3.19 (s, 3H), 2.40 (s, 3H); <sup>13</sup>C NMR (100 MHz, CDCl<sub>3</sub>): δ = 164.8, 153.7, 136.7, 134.8, 130.9, 130.1, 128.9 (2C), 128.4 (2C), 127.0, 126.3, 123.4, 121.6, 111.7, 36.5, 12.2; IR (KBr): 3071, 3028, 1764, 1662, 1629, 1586, 1549, 1462, 1310, 1022, 981, 917, 861, 786, 702 cm<sup>-1</sup>; HR-MS: m/z calcd for C<sub>17</sub>H<sub>15</sub><sup>35</sup>ClN<sub>2</sub>O: 298.0865 [M]<sup>+</sup>; found: 298.0874.

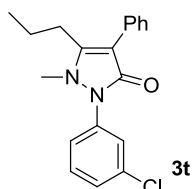

**2-(3-chlorophenyl)-1-methyl-4-phenyl-5-propyl-1H-pyrazol-3(2H)-one (3t):**

yellow solid. mp:115.5-116.2 °C. <sup>1</sup>H NMR (400 MHz, CDCl<sub>3</sub>): δ = 7.51-7.49 (m, 3H), 7.44-7.41 (m, 4H), 7.32 (t, *J* = 7.3 Hz, 1H), 7.29-7.25 (m, 1H), 3.14 (s, 3H), 2.73-2.68 (t, *J* = 7.8 Hz, 2H), 1.80-1.74 (m, 2H), 1.07 (t, *J* = 7.4 Hz, 3H); <sup>13</sup>C NMR (100 MHz, CDCl<sub>3</sub>): δ = 164.9, 157.9, 136.7, 134.7, 130.9, 130.1, 129.0 (2C), 128.4 (2C), 127.0, 126.2, 123.3, 121.6, 112.1, 36.7, 27.4, 22.4, 14.1. IR (KBr): 3129, 3080, 1657, 1612, 1590, 1481, 1429, 1399, 1342, 1018, 998, 860, 829, 774, 725, 697 cm<sup>-1</sup>; HR-MS: m/z calcd for C<sub>19</sub>H<sub>19</sub><sup>35</sup>ClN<sub>2</sub>O: 326.1174 [M]<sup>+</sup>; found: 326.1182.

**References**

- Balestra, M.; Bunting, H.; Chen, D.; Egle, I.; Forst, J.; Frey, J.; Isaac, M.; Ma, F.; Nugiel, D.; Slassi, A.; Steelman, G.; Sun, G.; Sundar, B.; Ukkiramapandian, R.; Urbanek, R.; Walsh, S. Pyrazolone Compounds as Metabotropic Glutamate Receptor Agonists for the Treatment of Neurological and Psychiatric Disorders. WO Patent 2006071730A1, July 6, 2006.
- Ailawadi, S.; Jyoti, Yadav, M.; Pathak, D. *Der Pharma Chemica* **2011**, 3, 215–222.

# NMR spectra data for all compounds

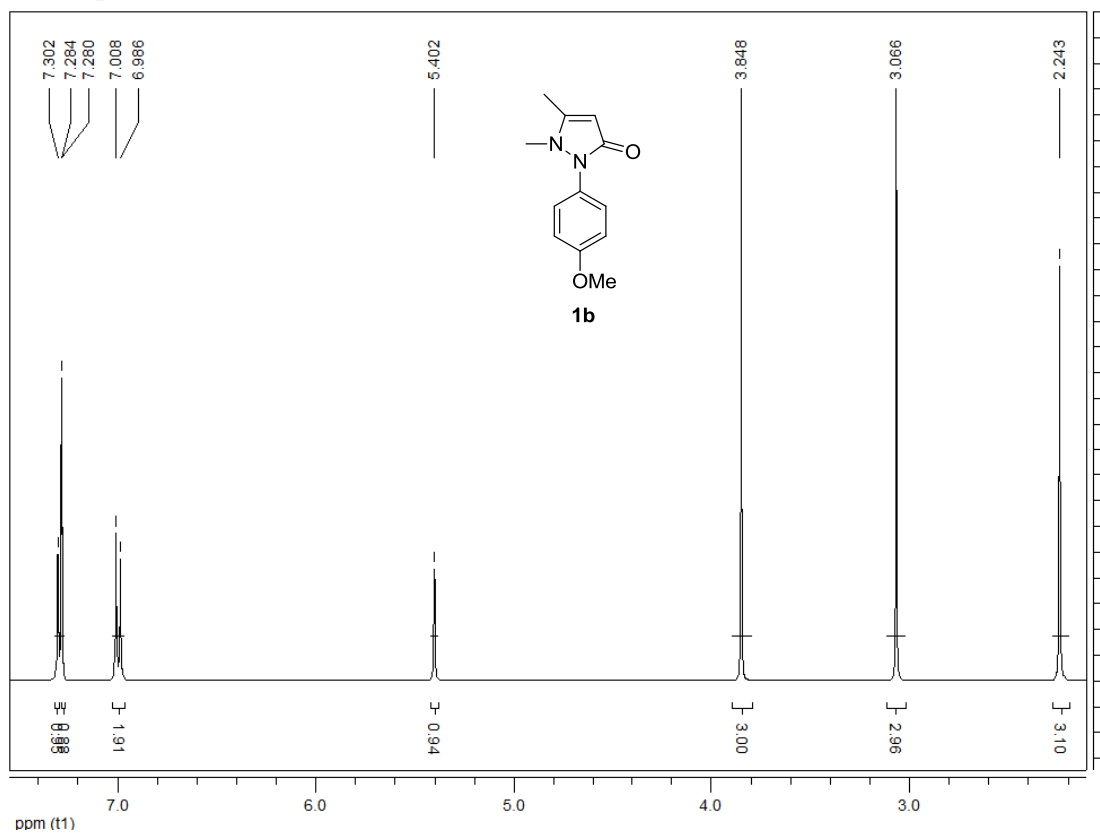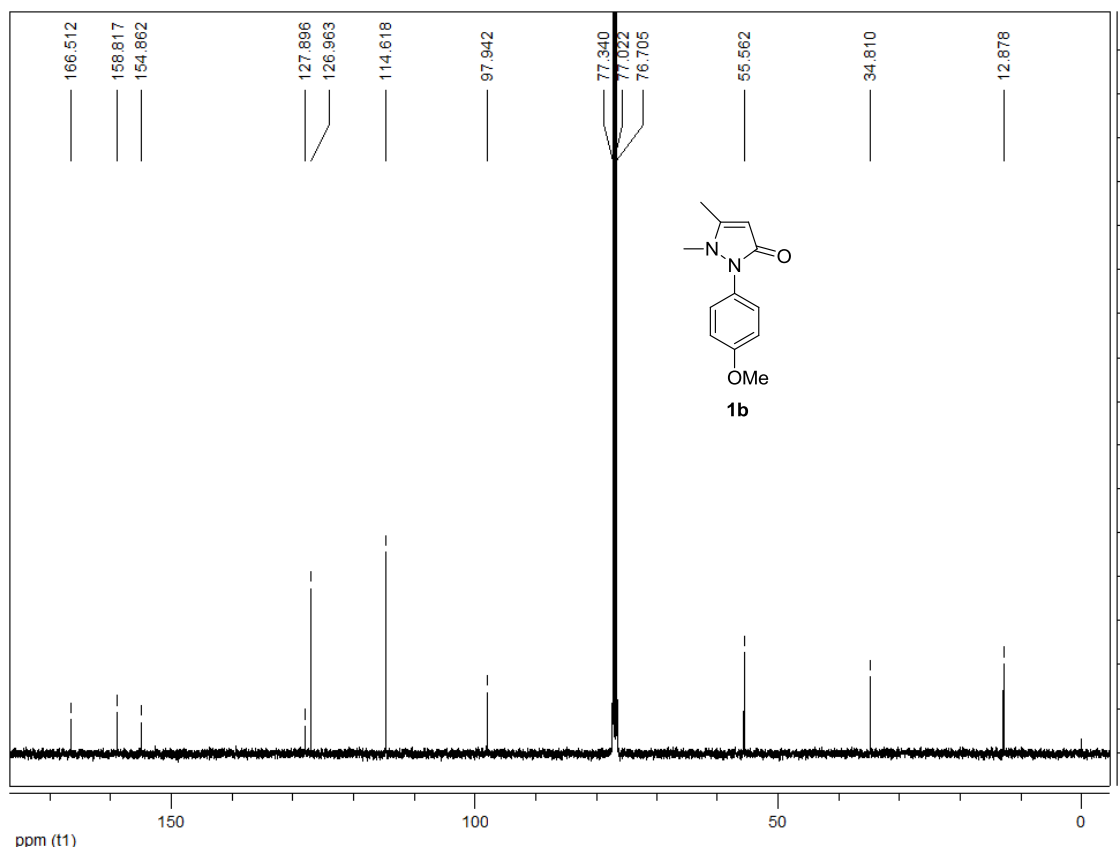

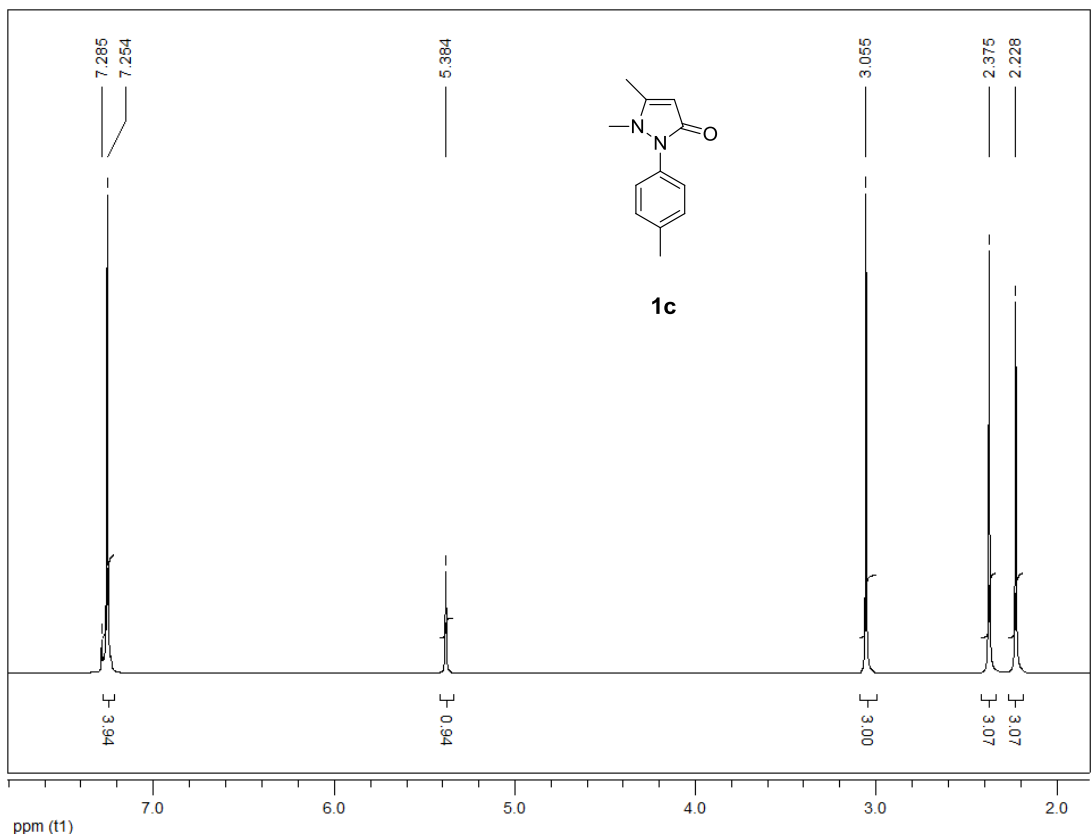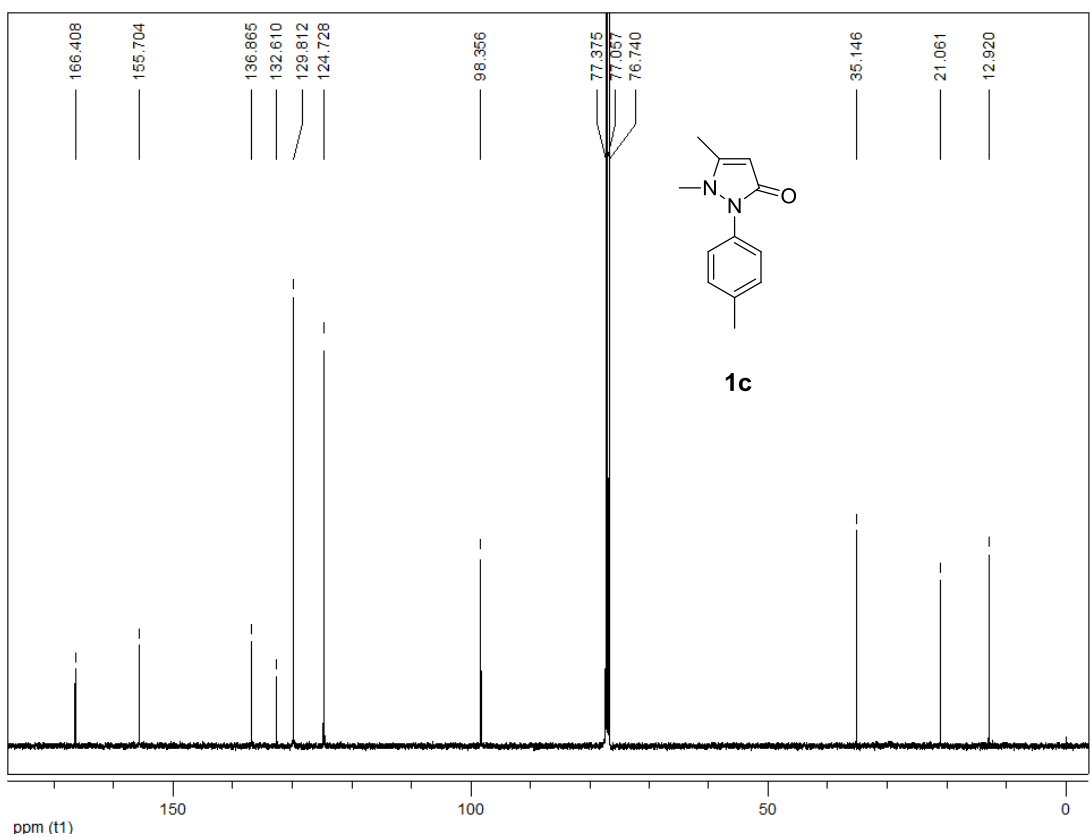

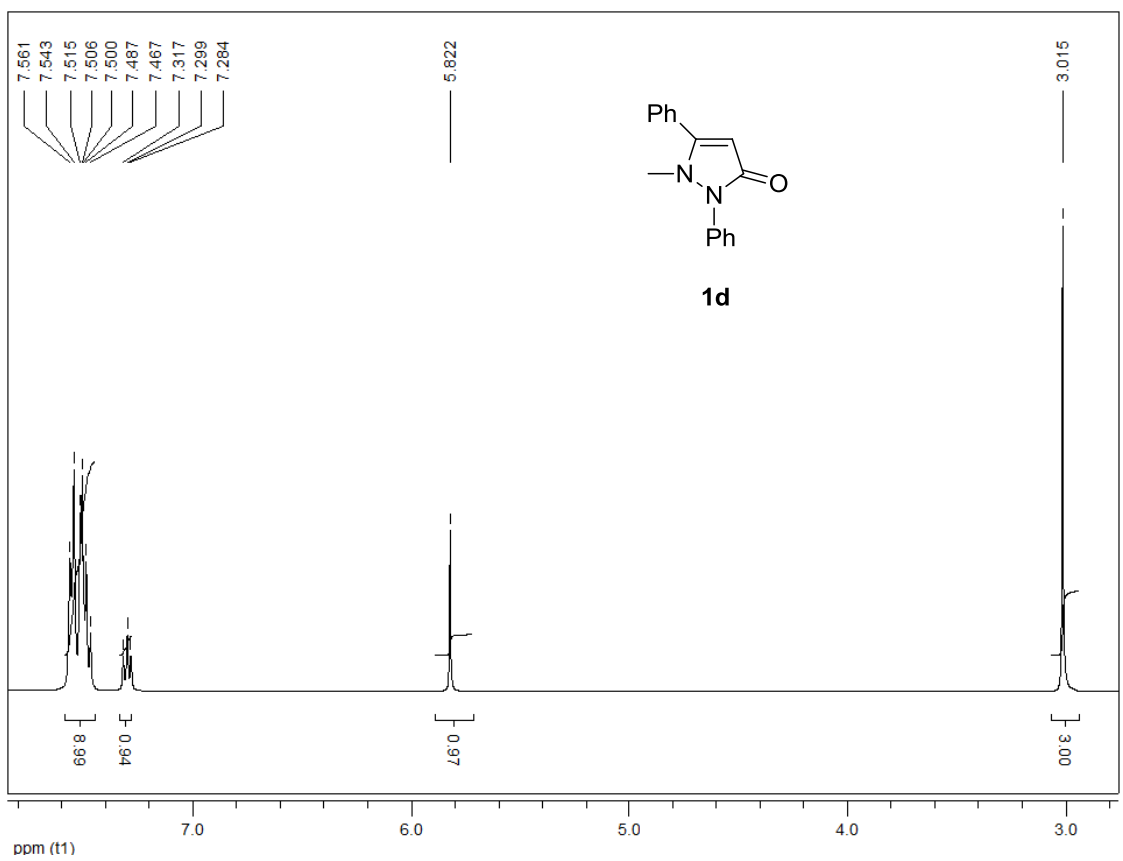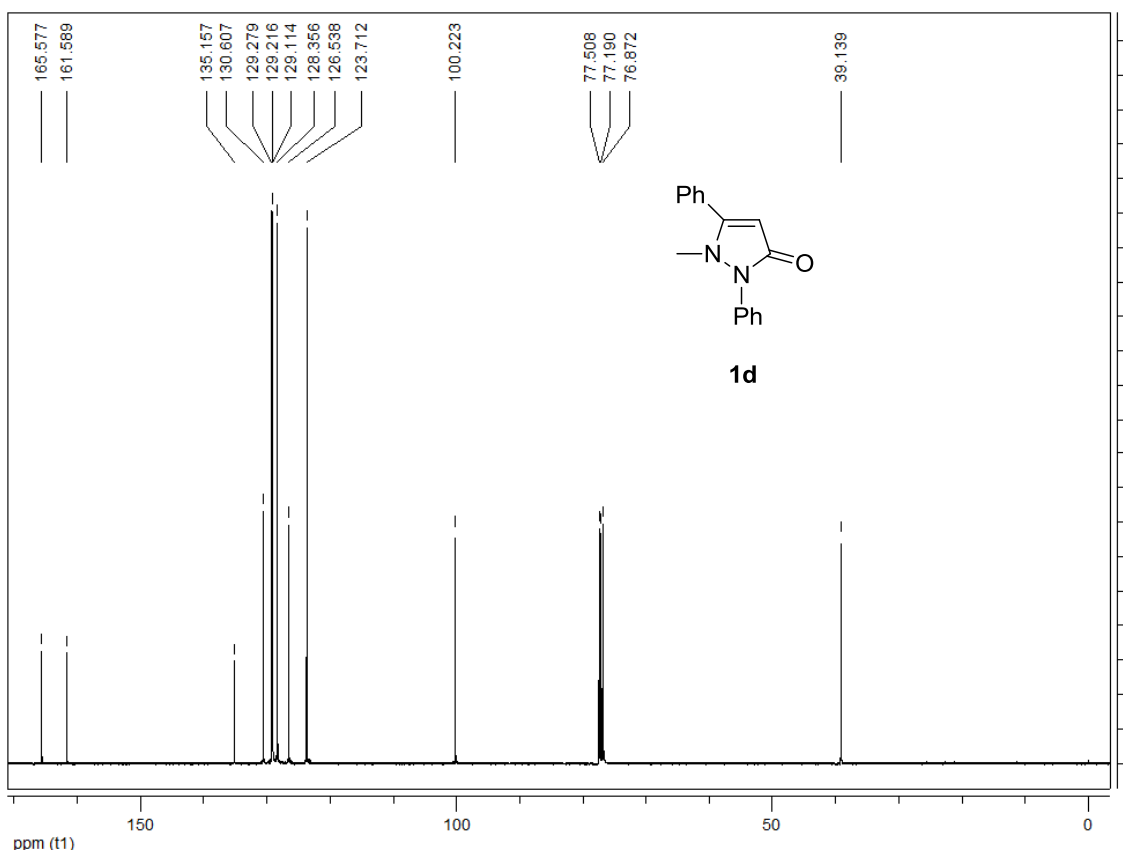

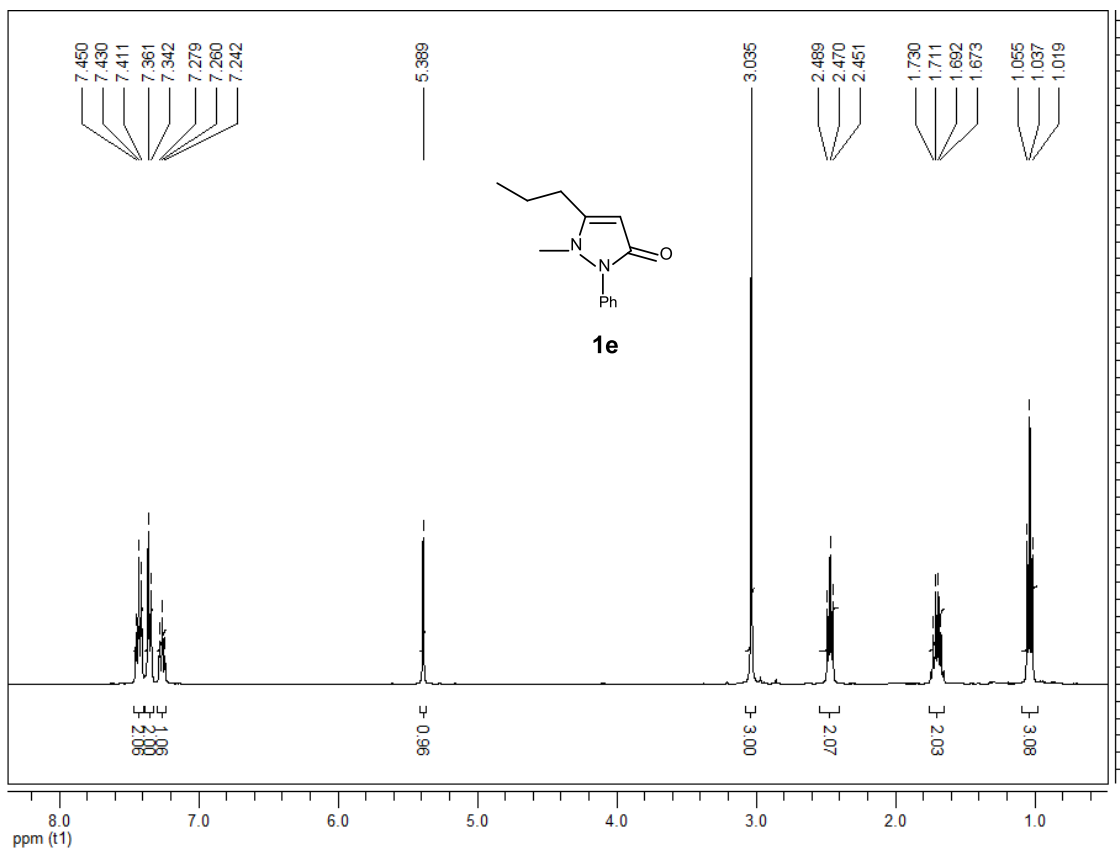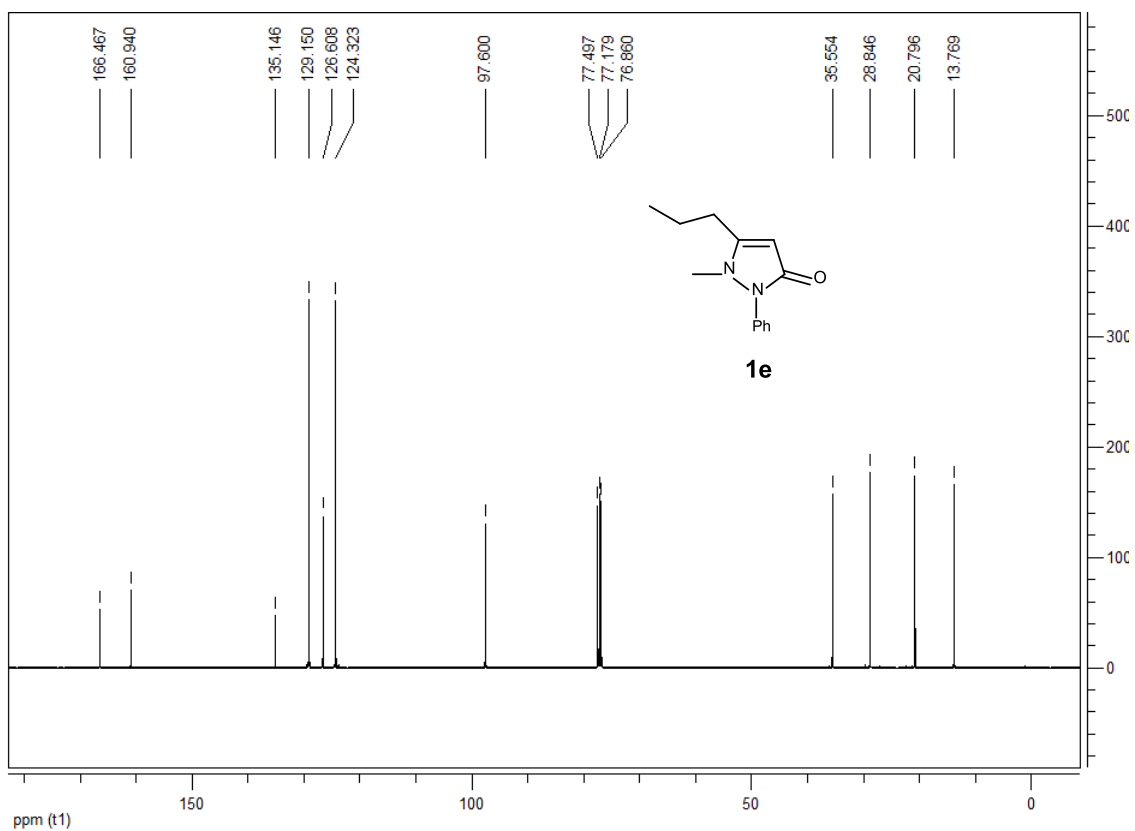



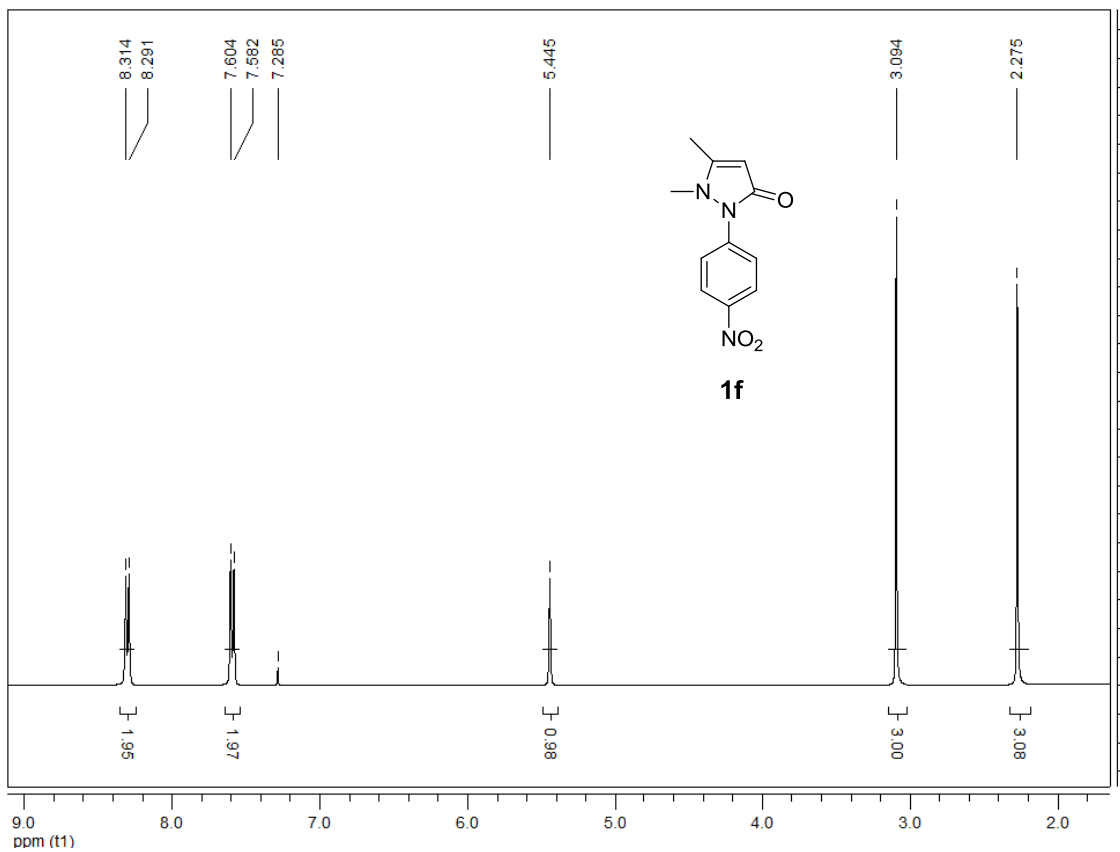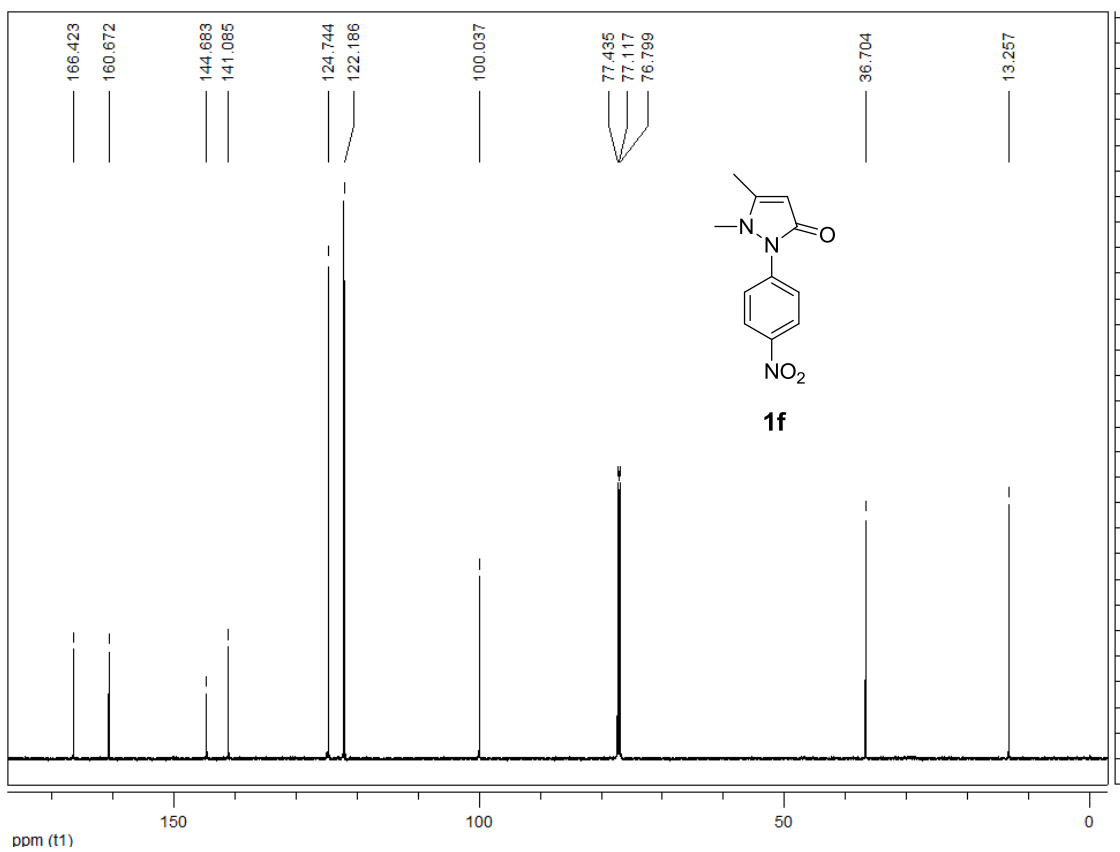

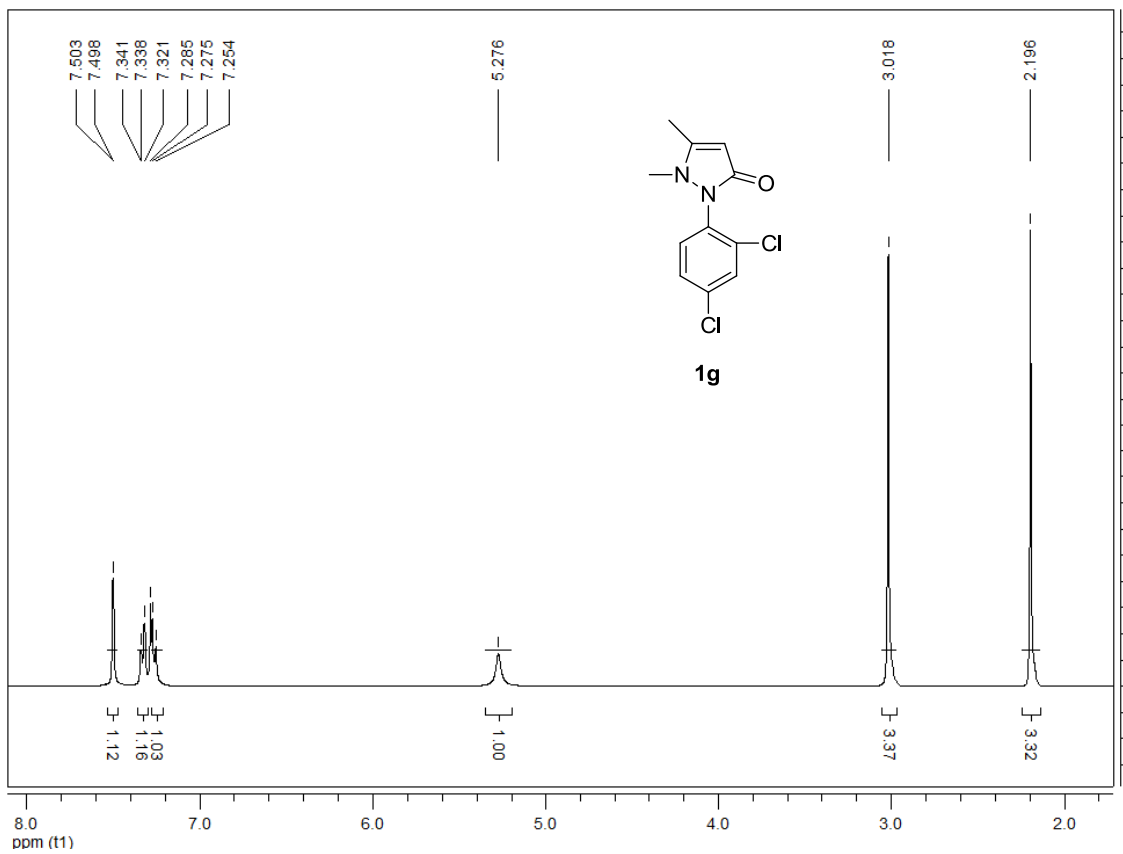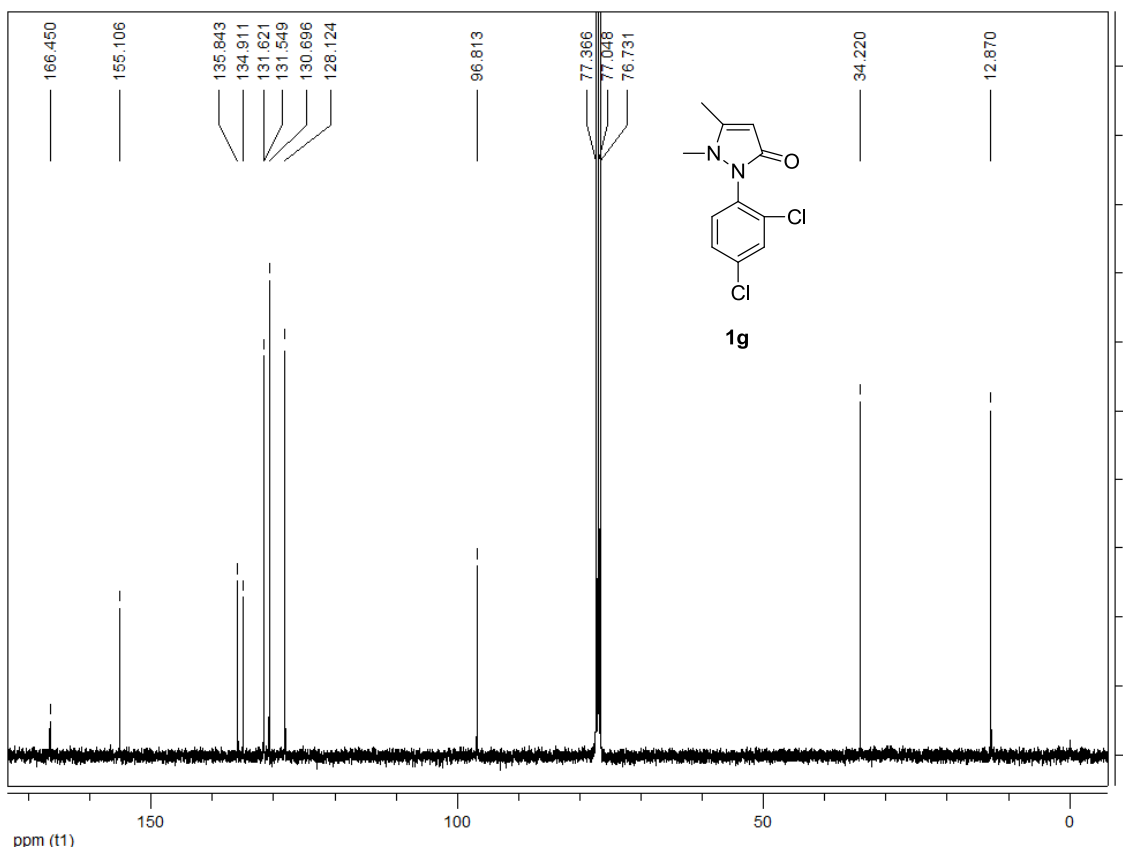

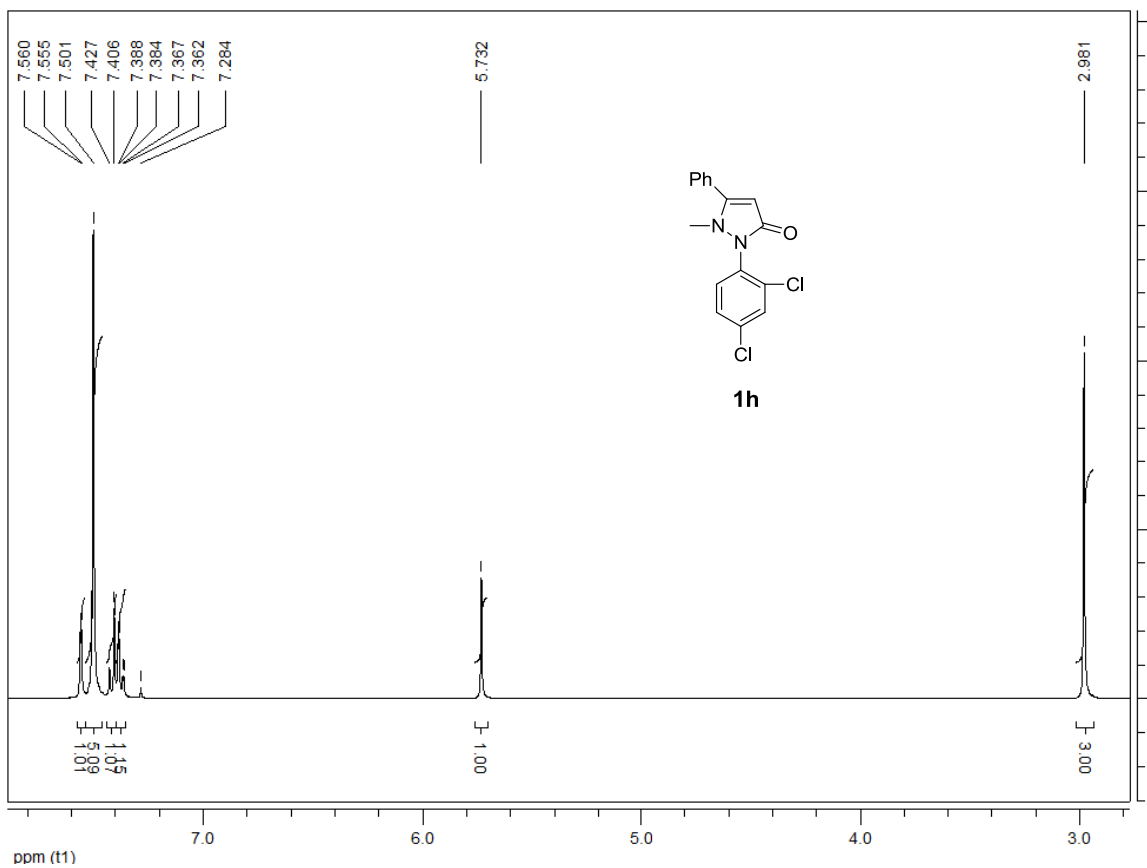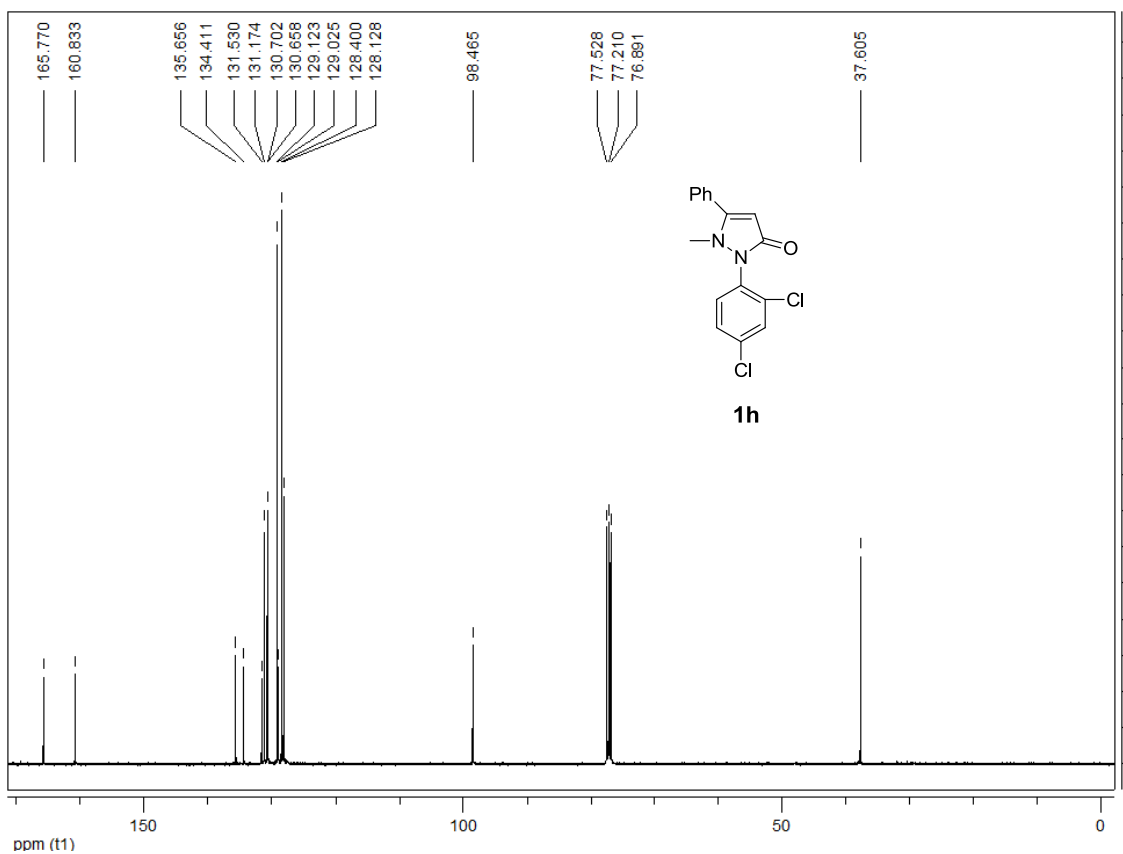

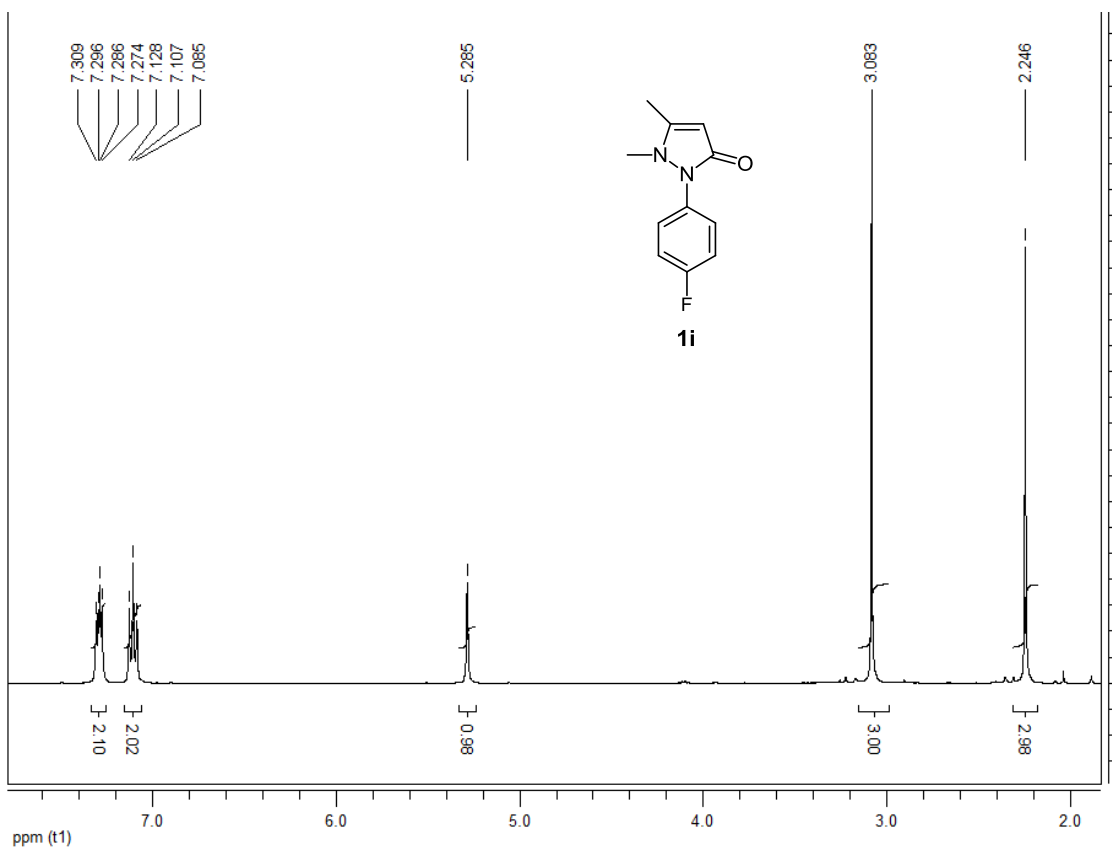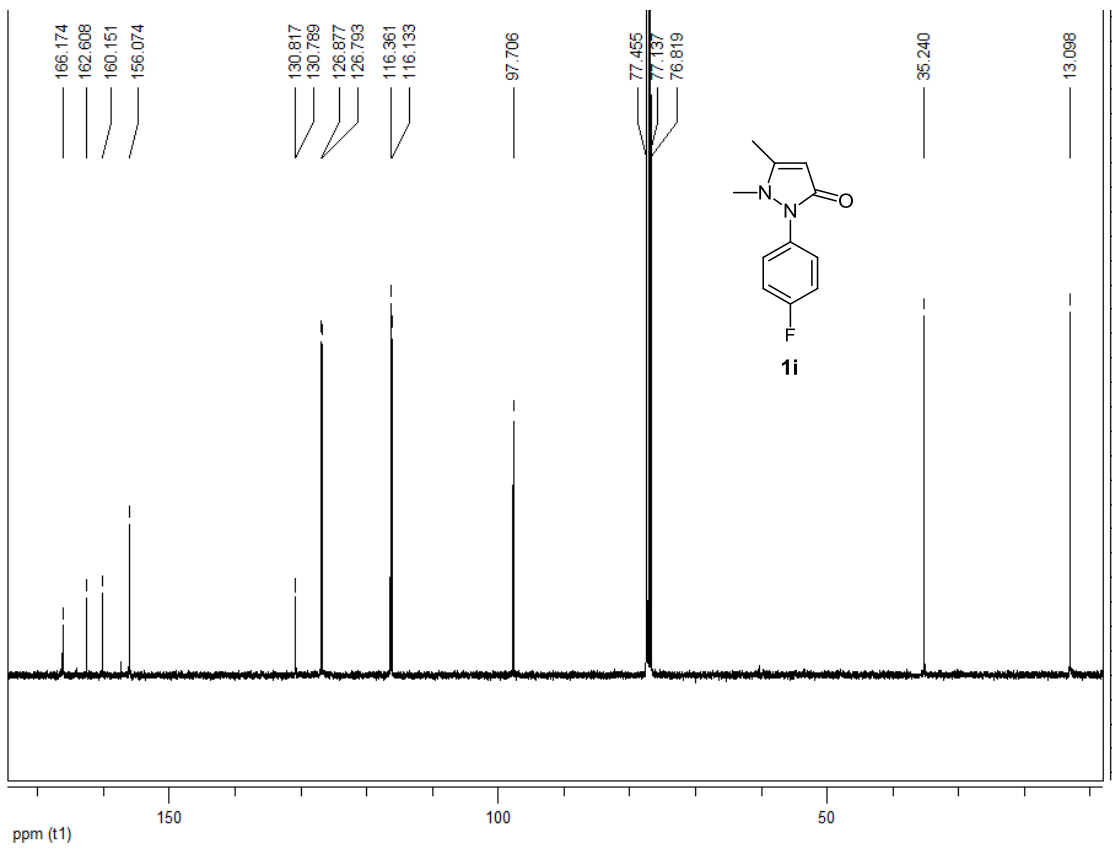

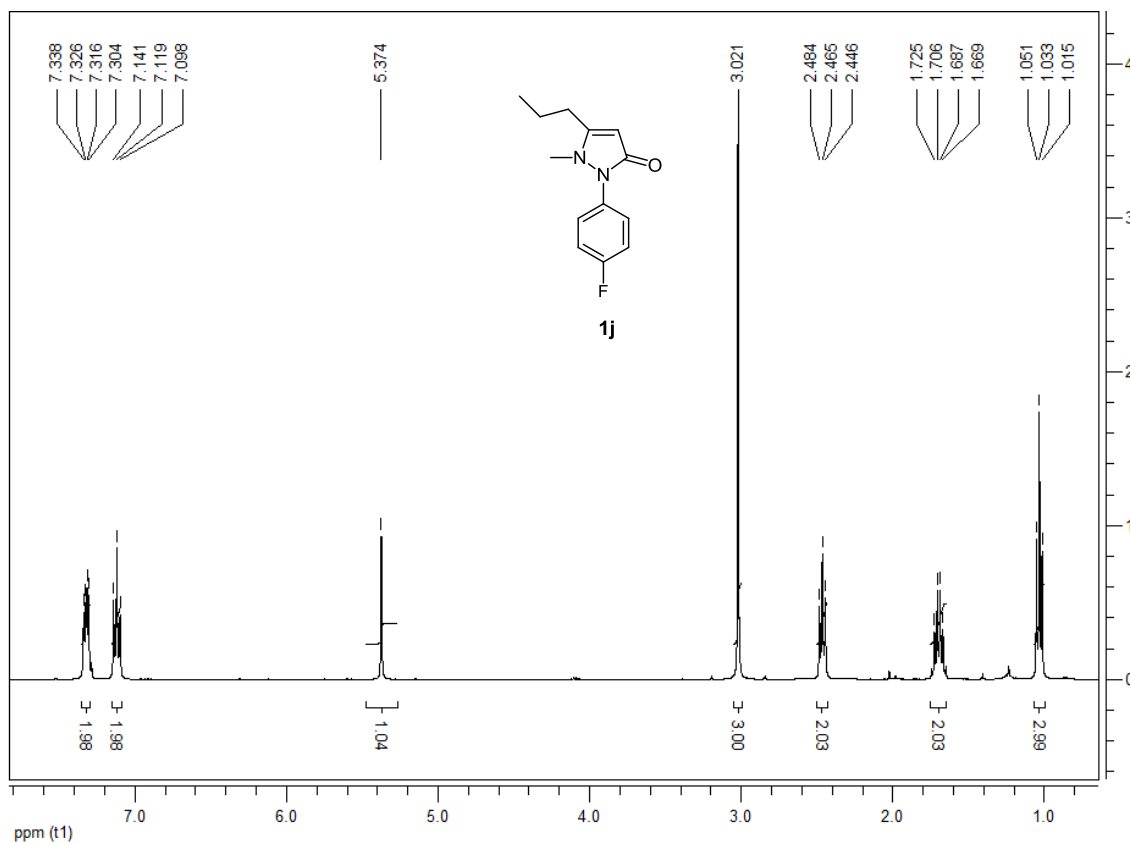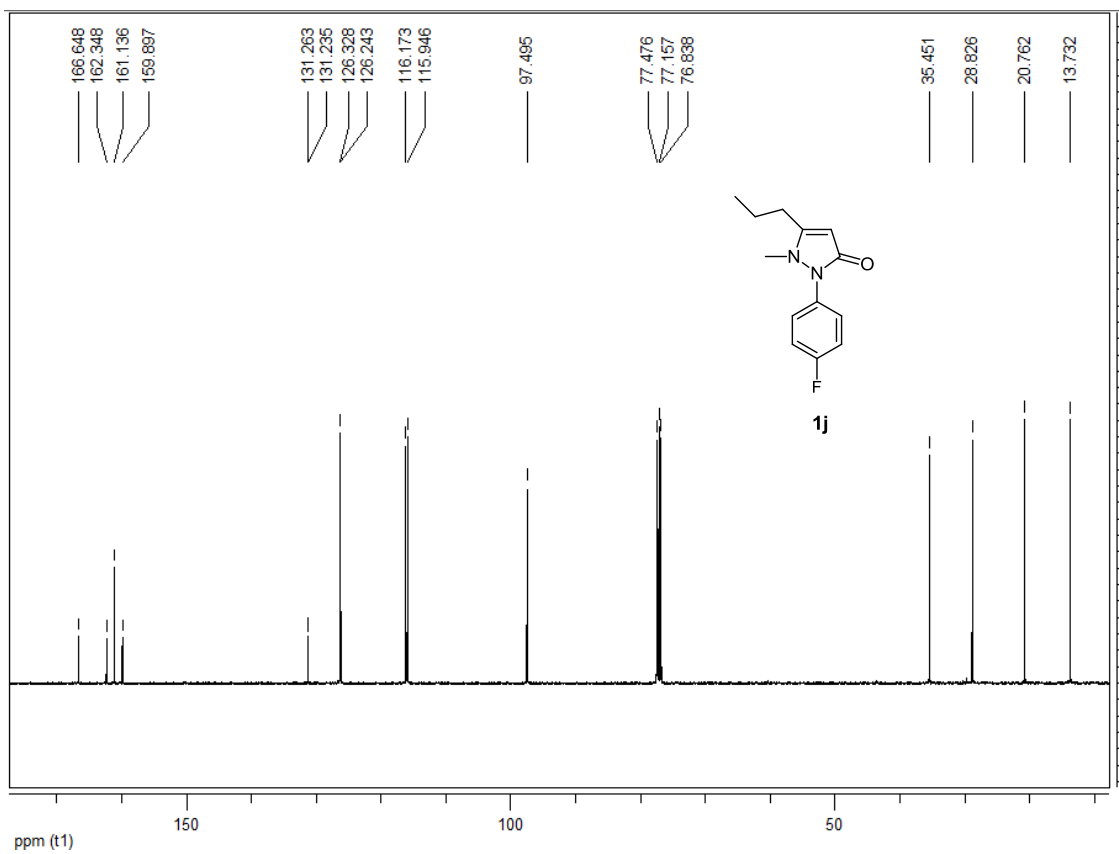

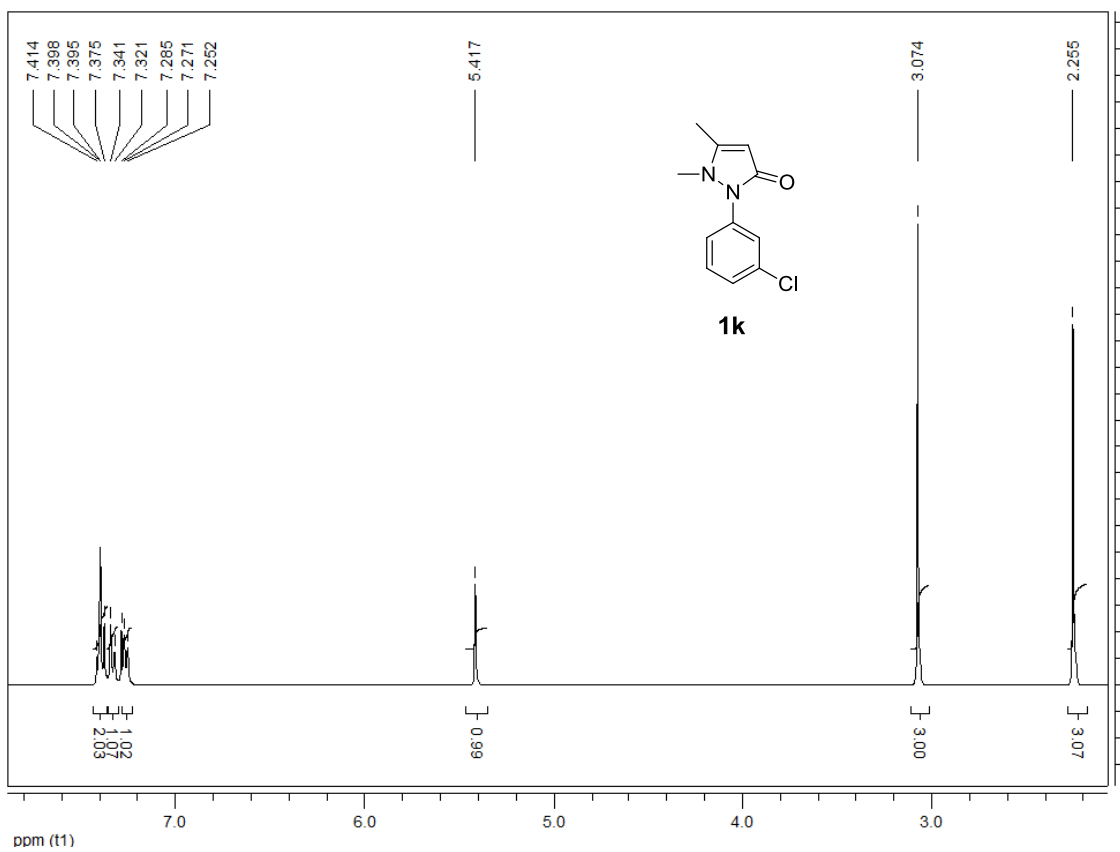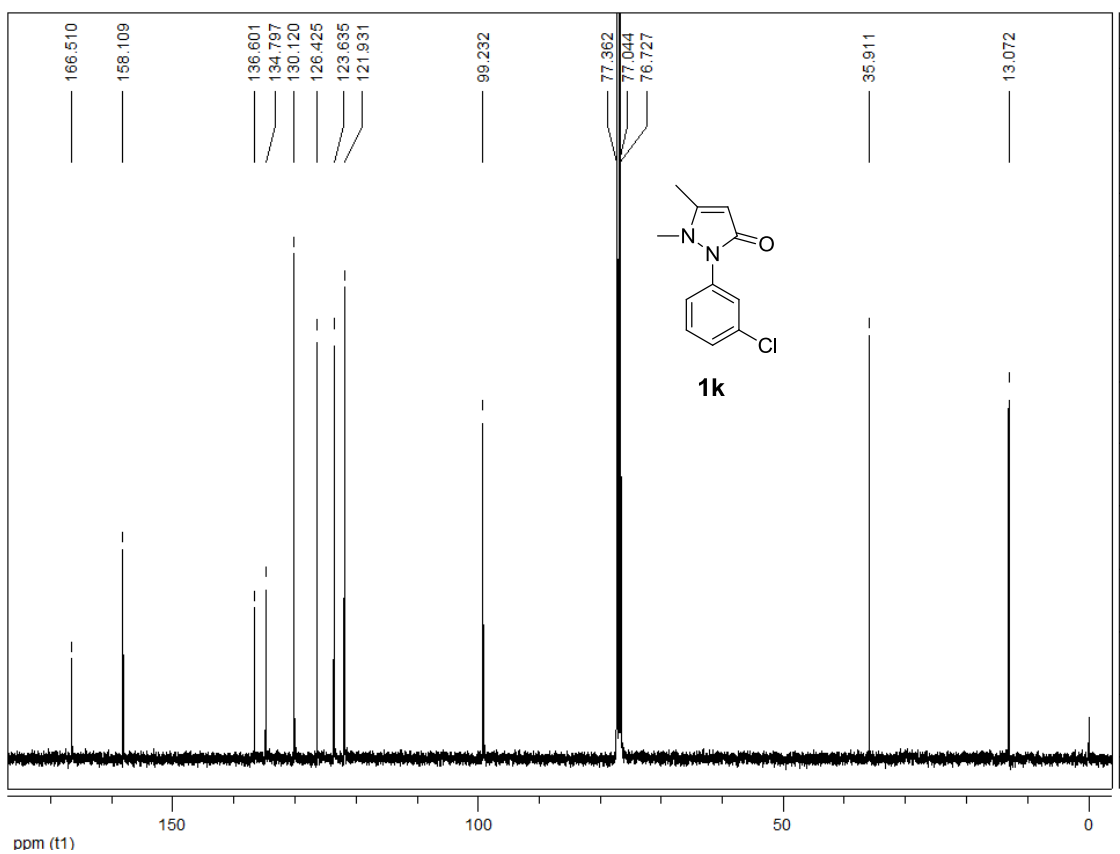

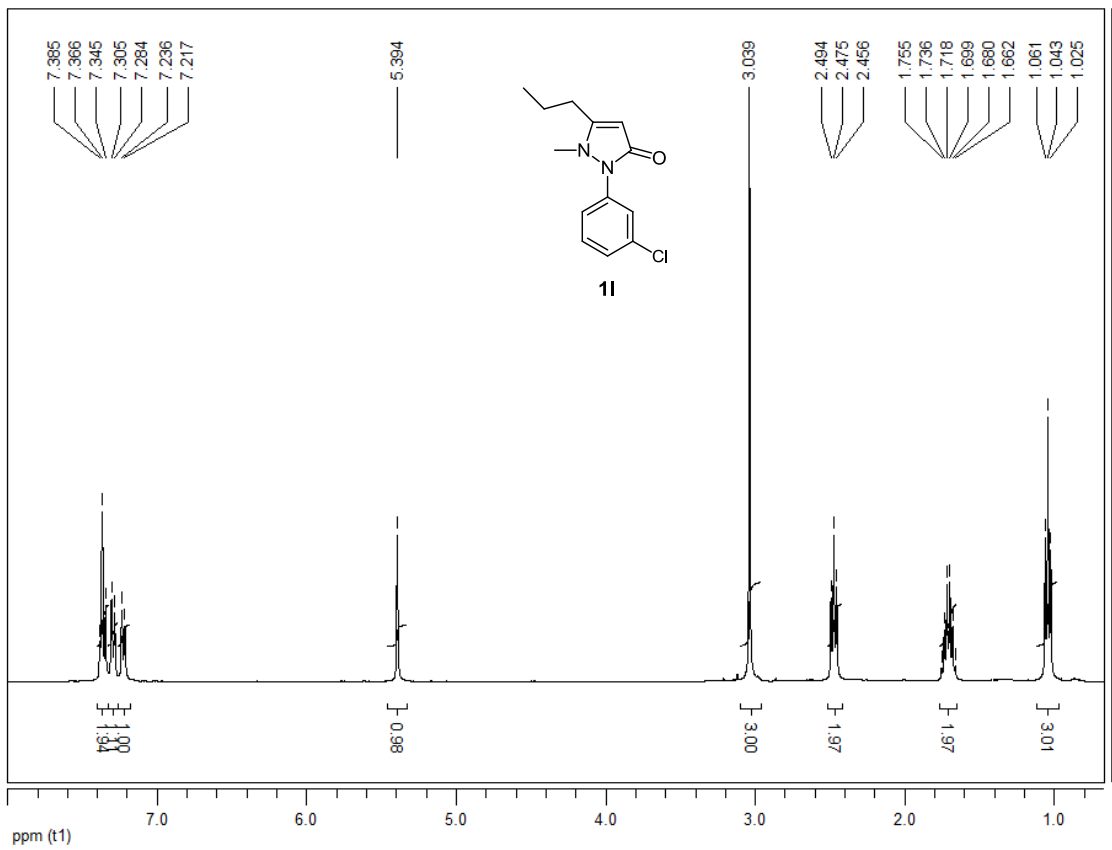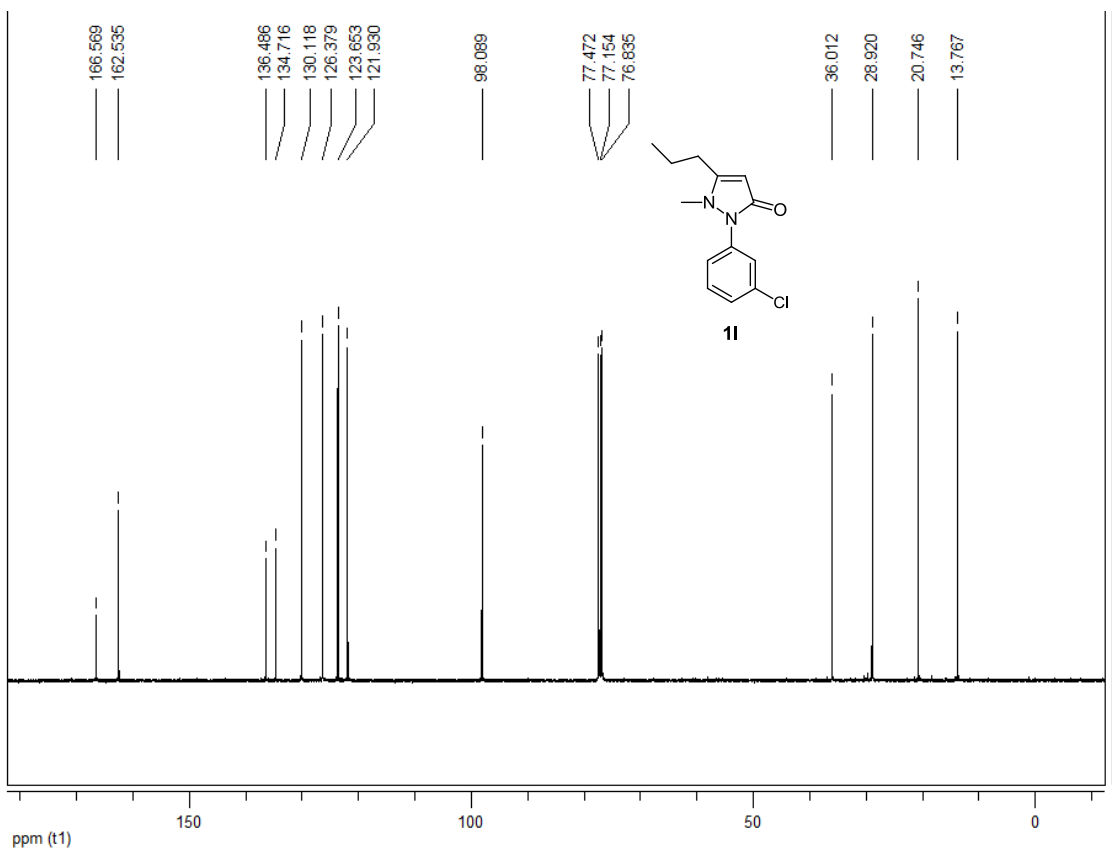

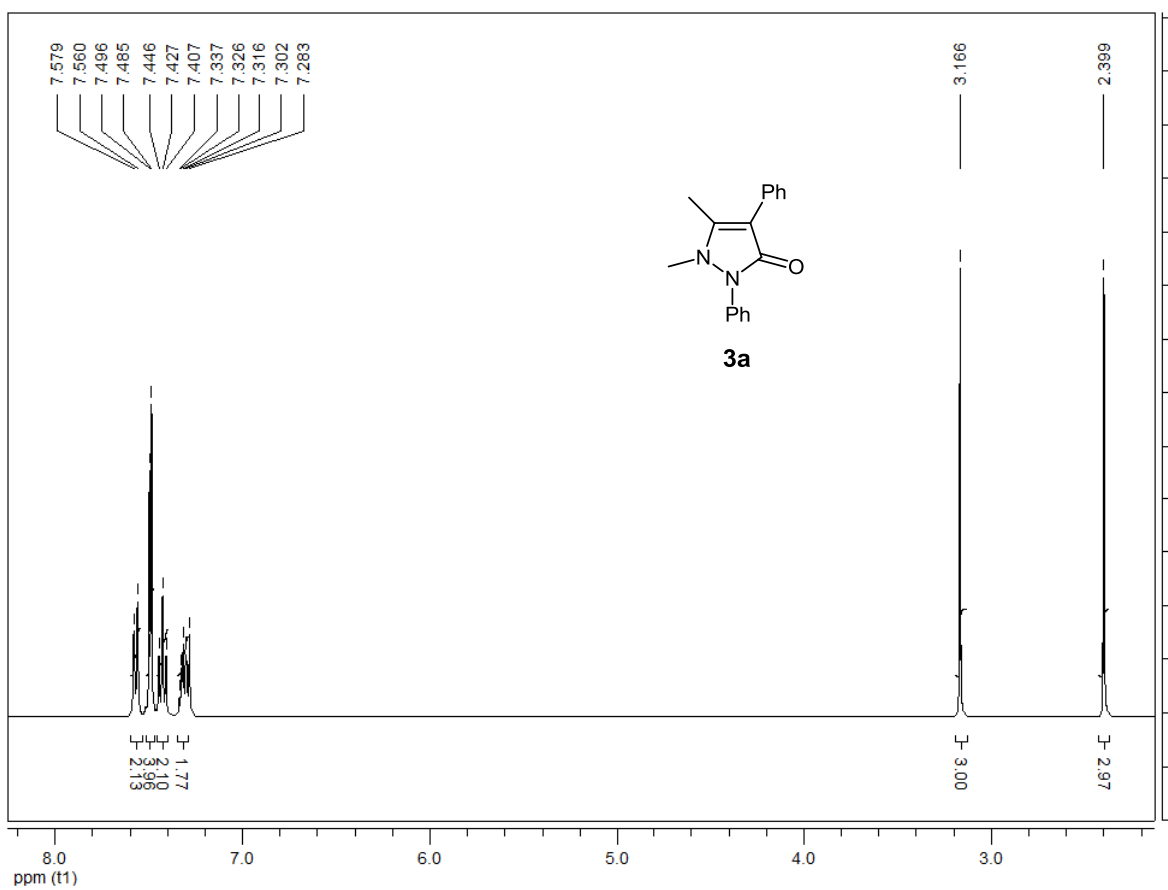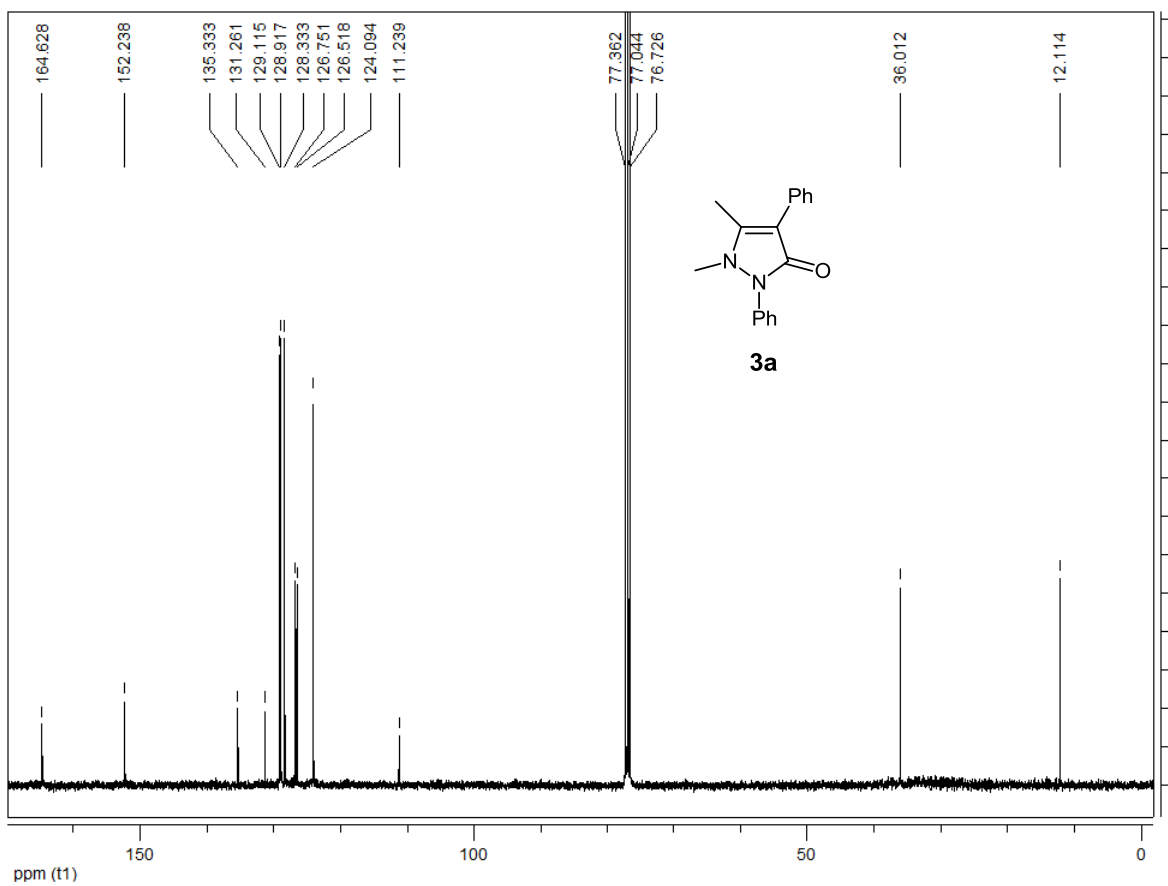



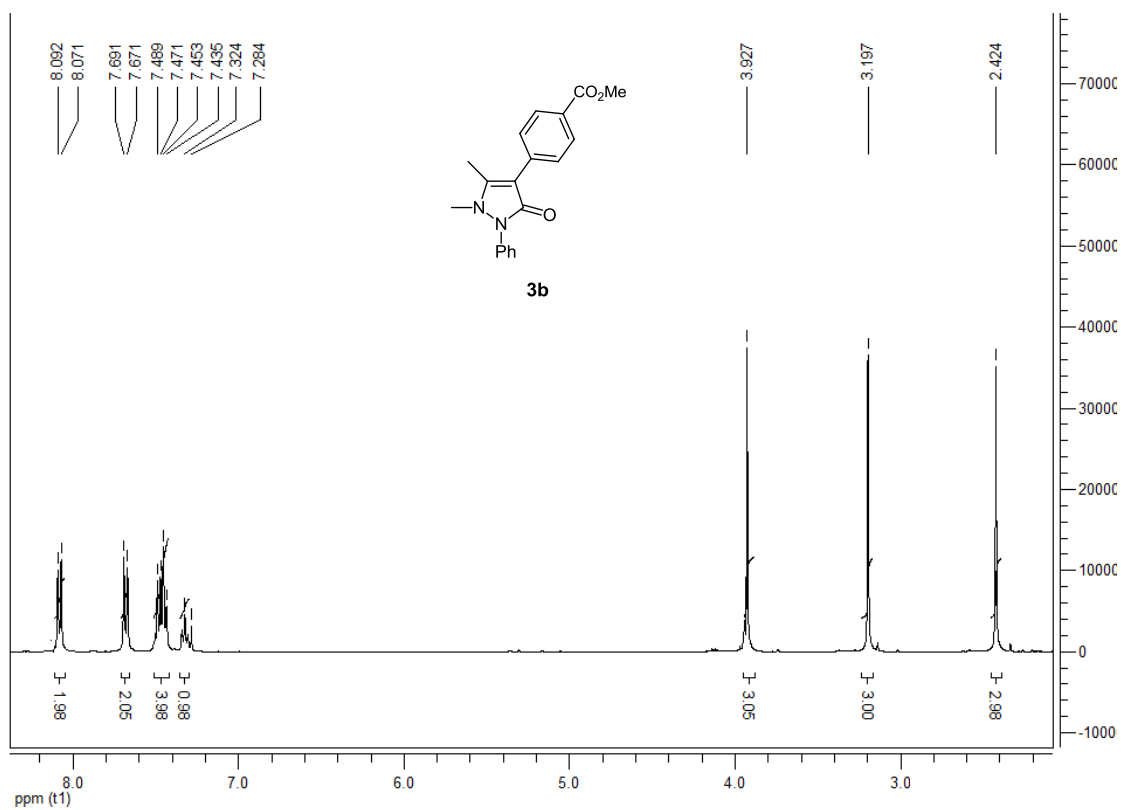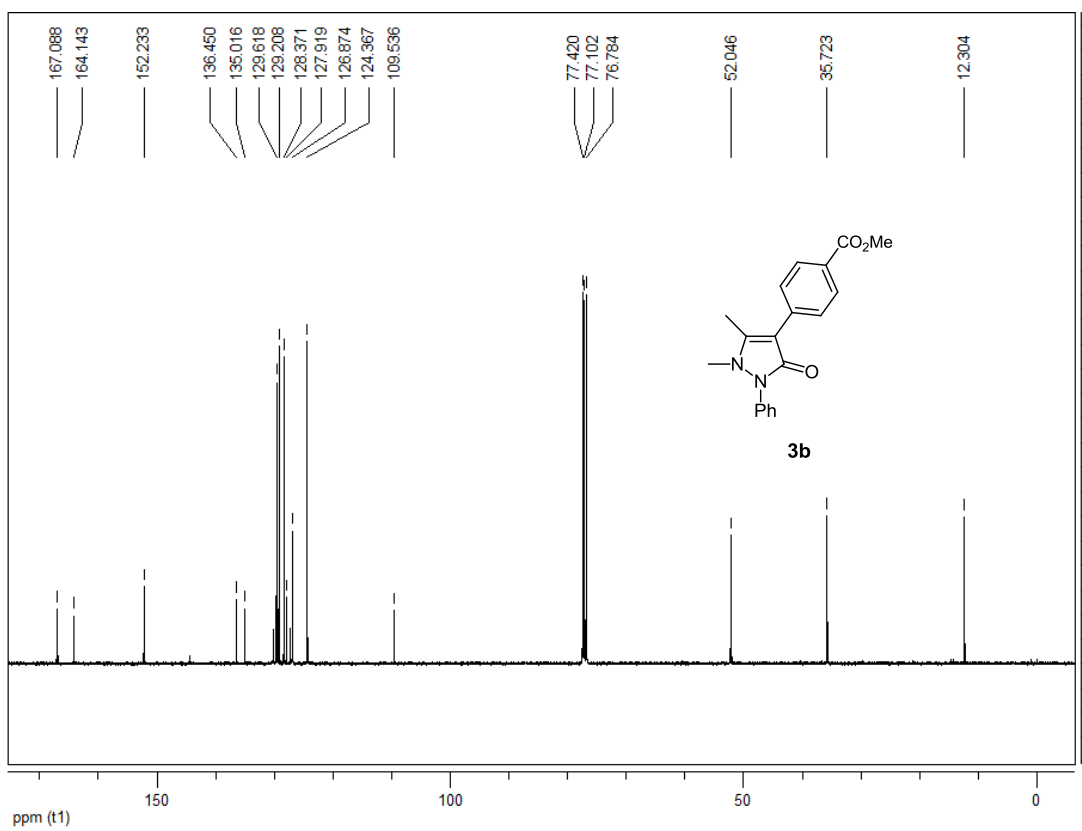

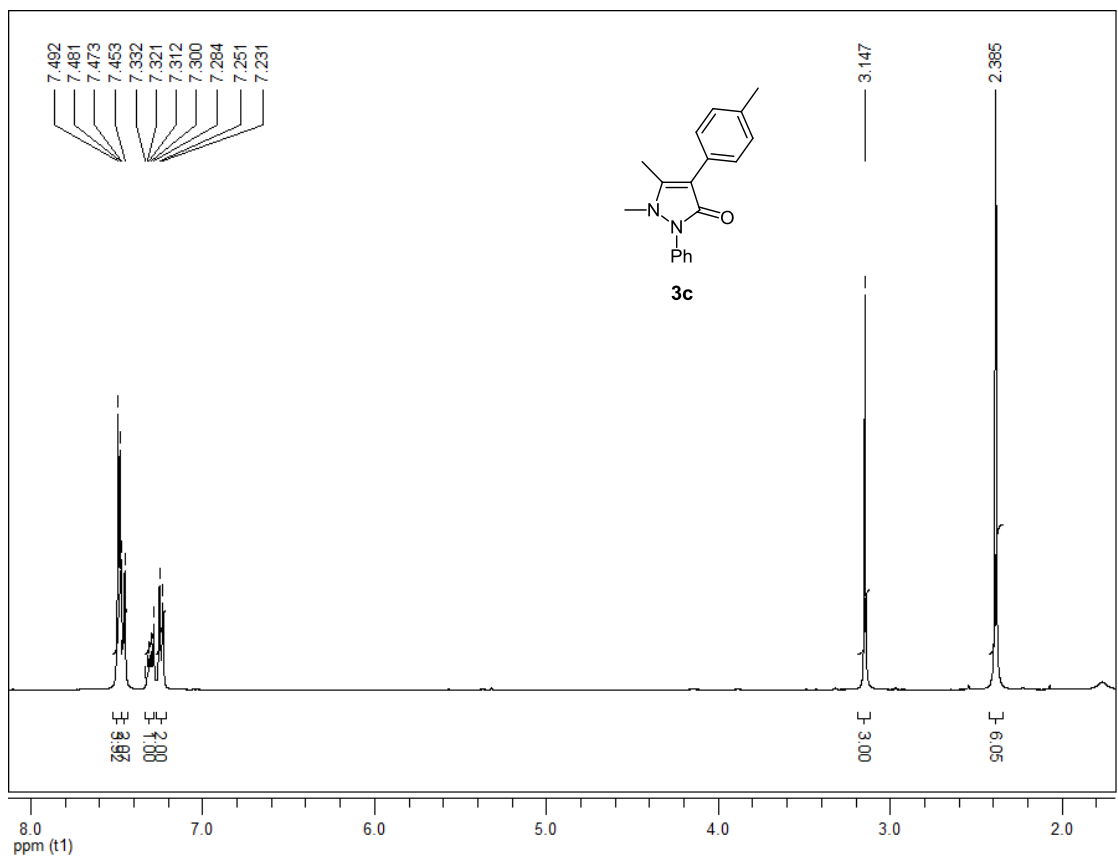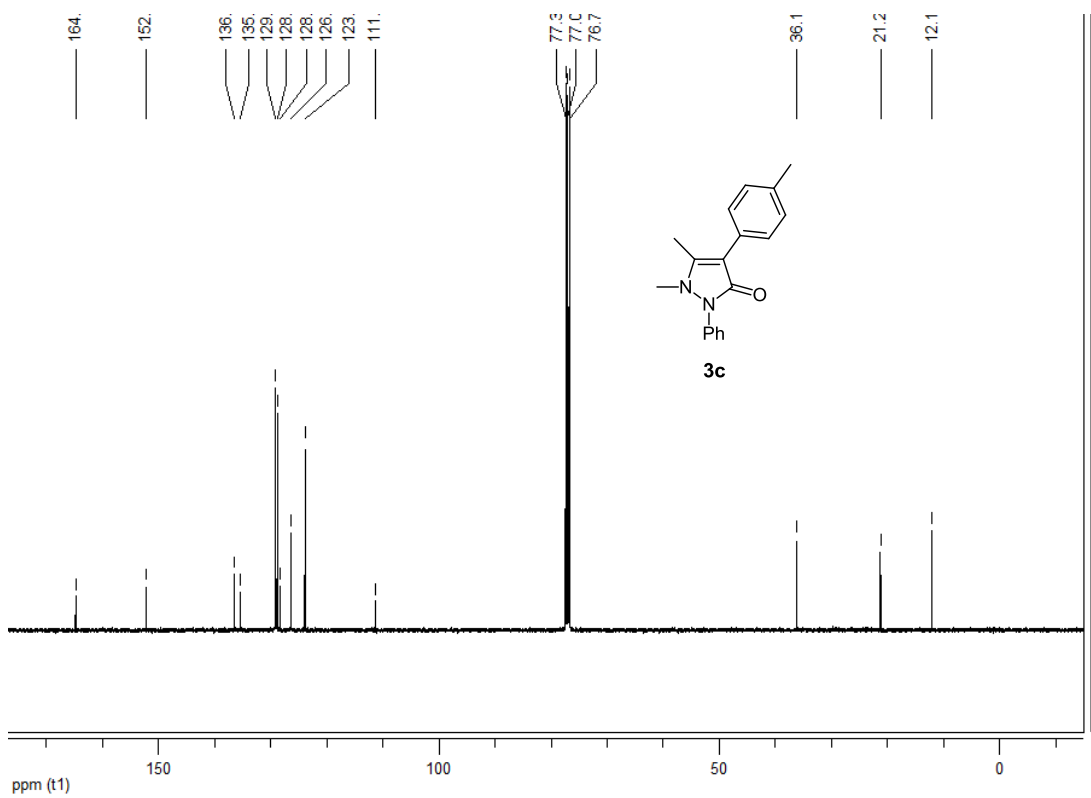

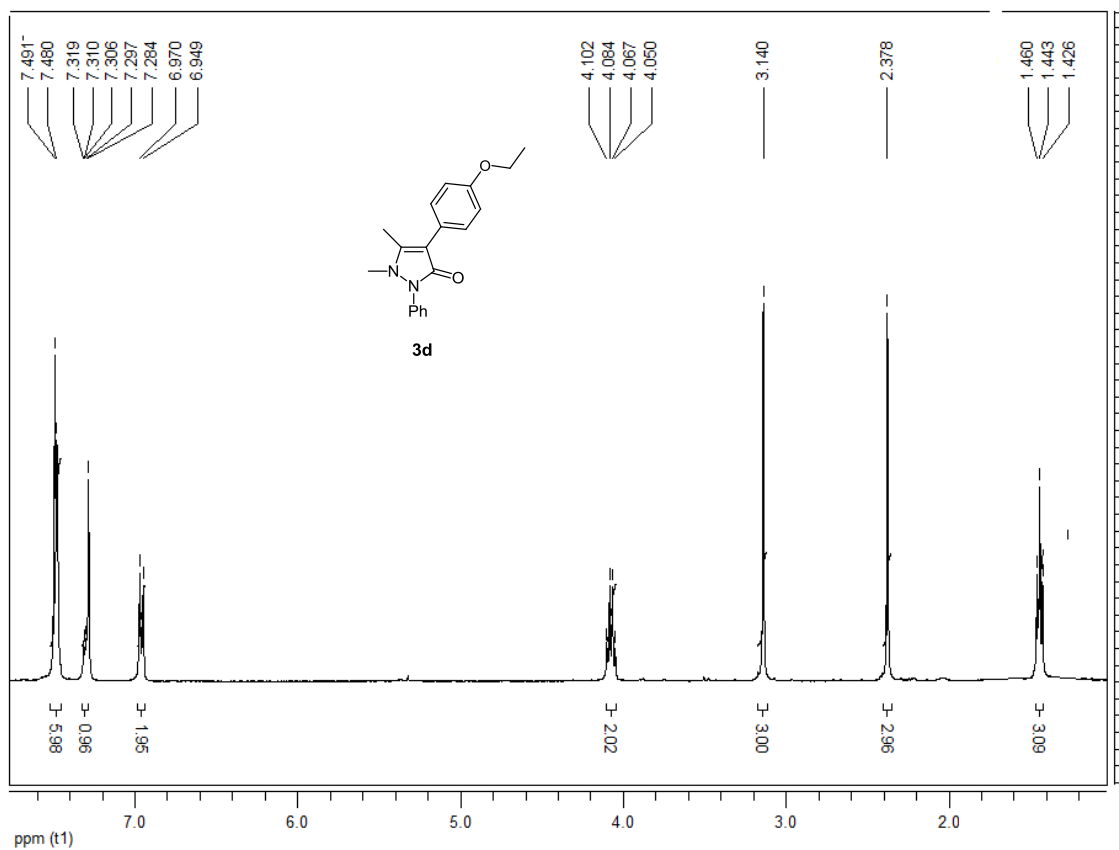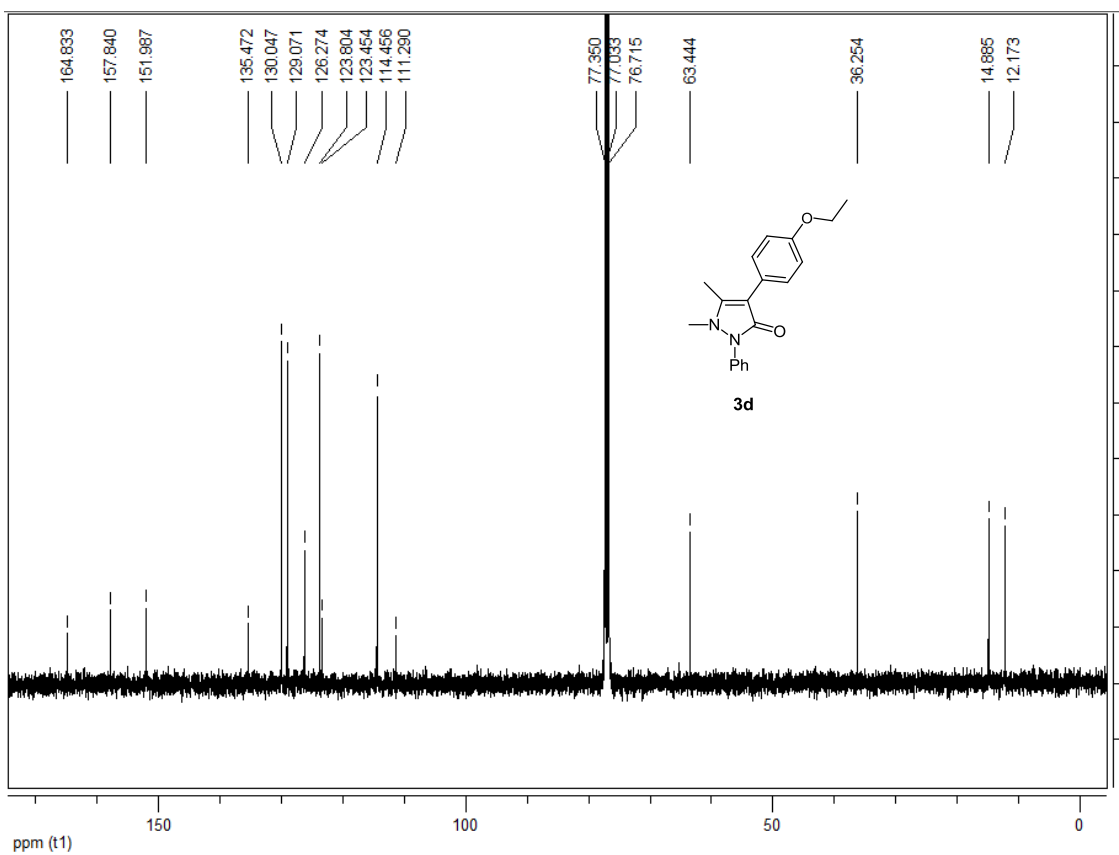

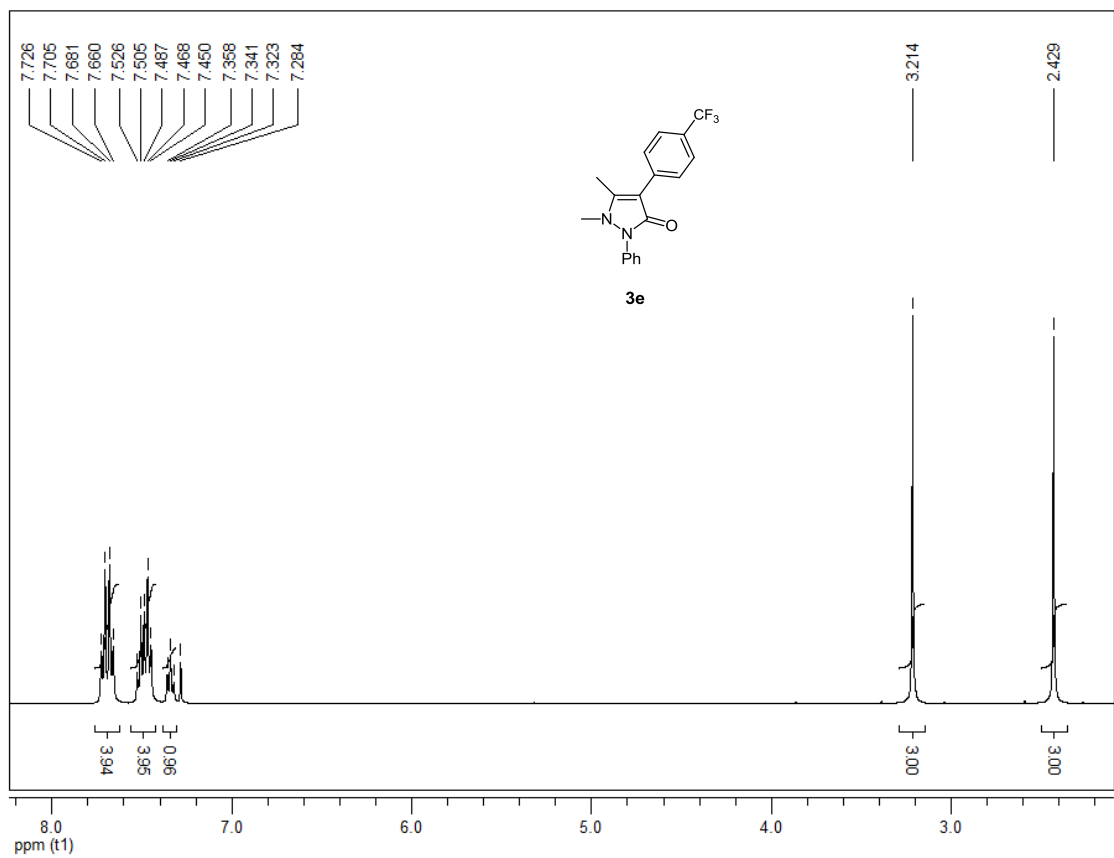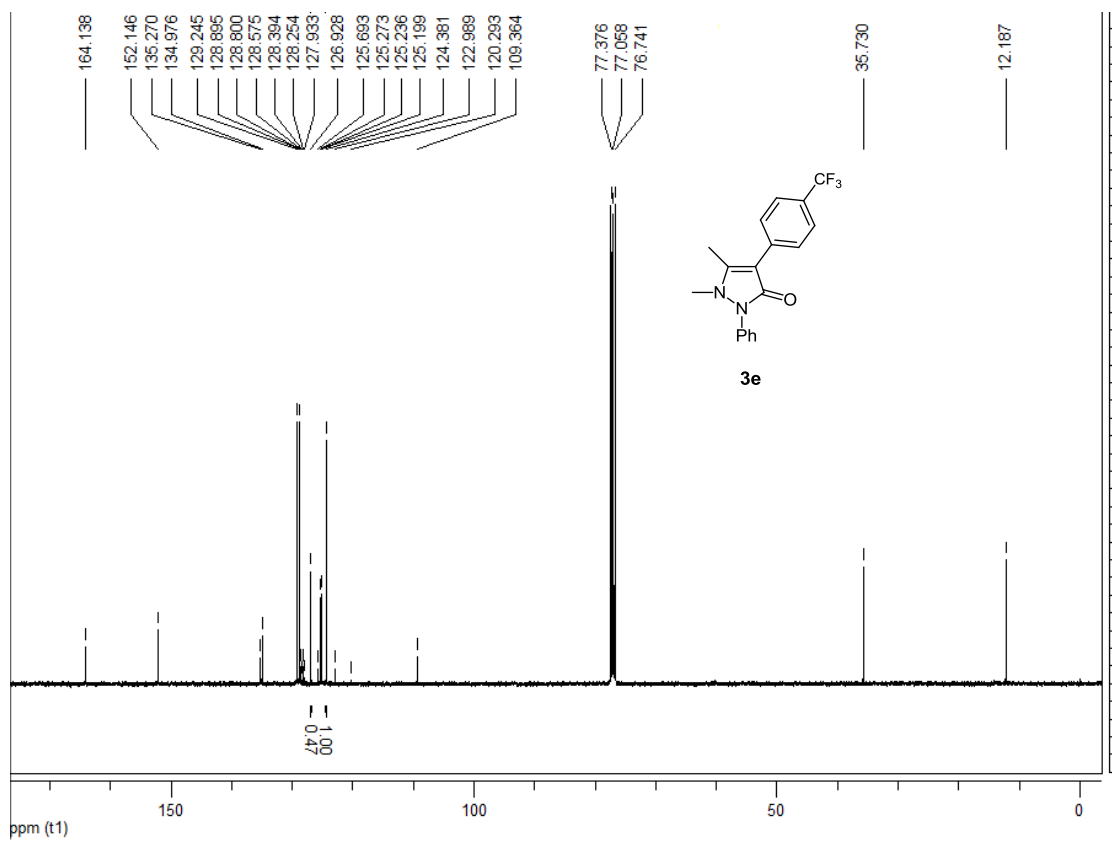

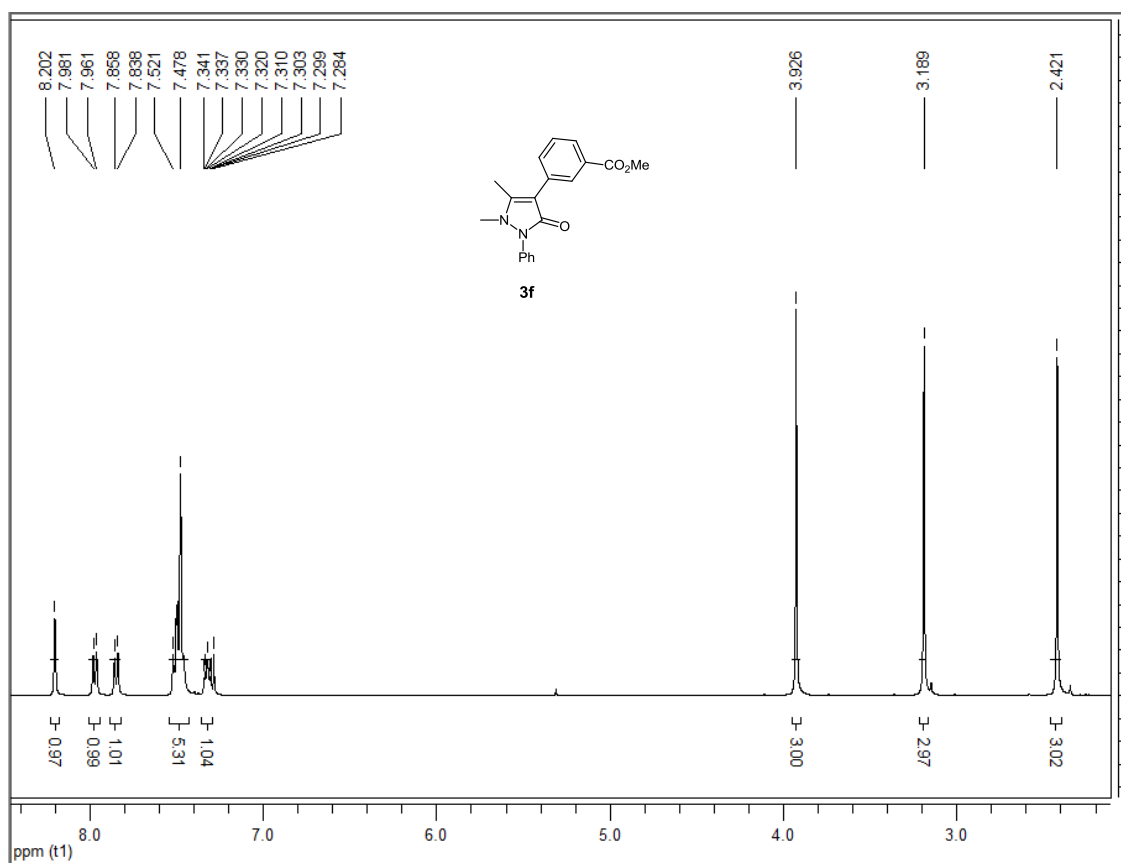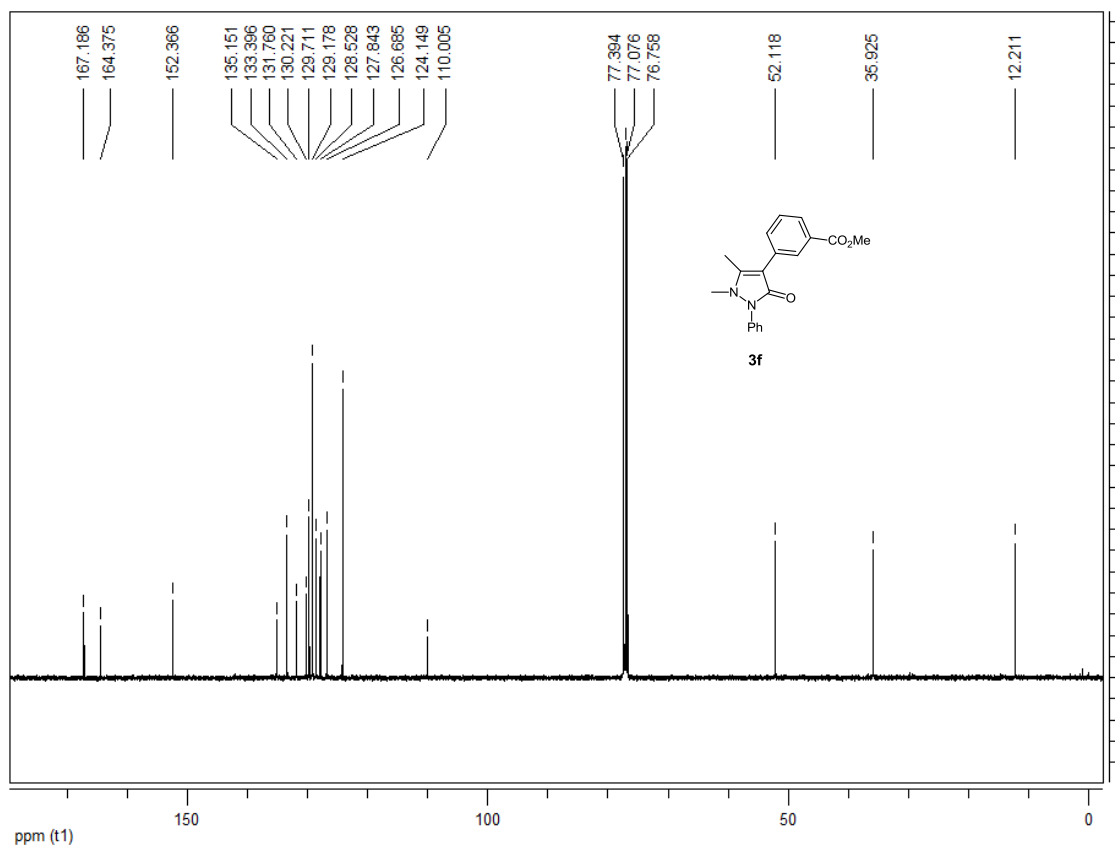

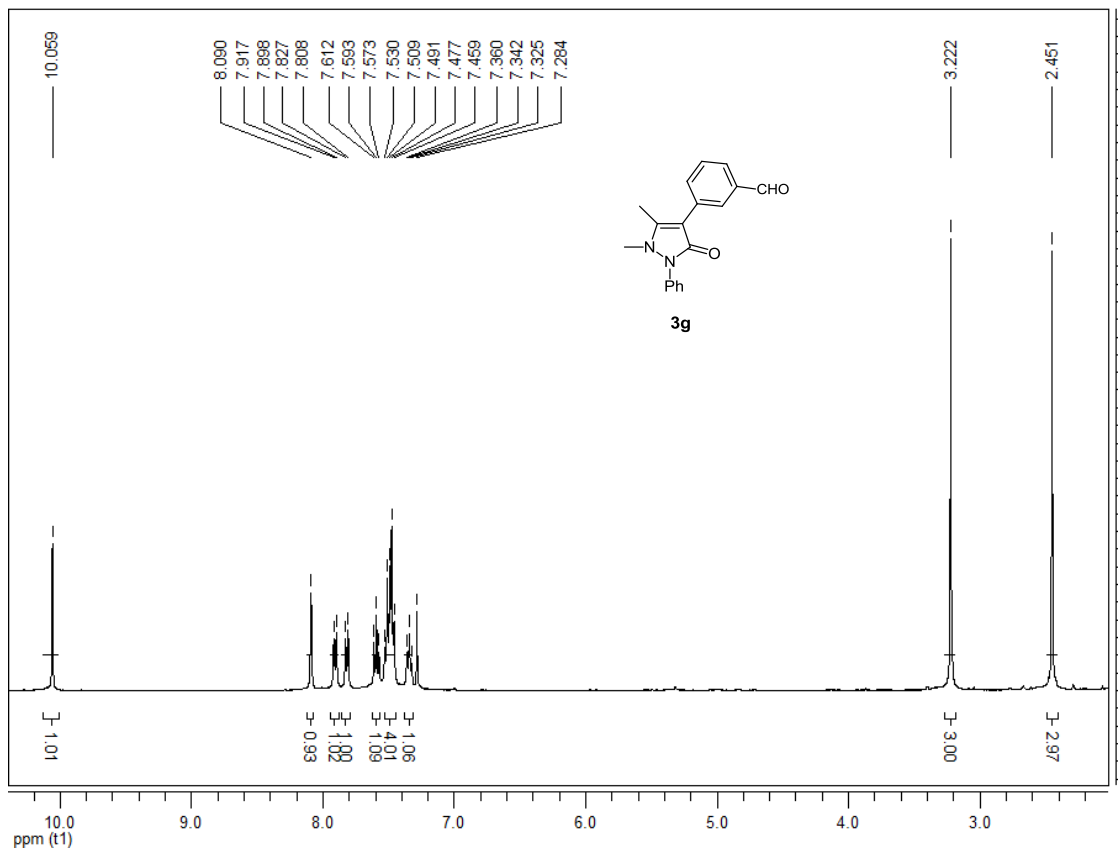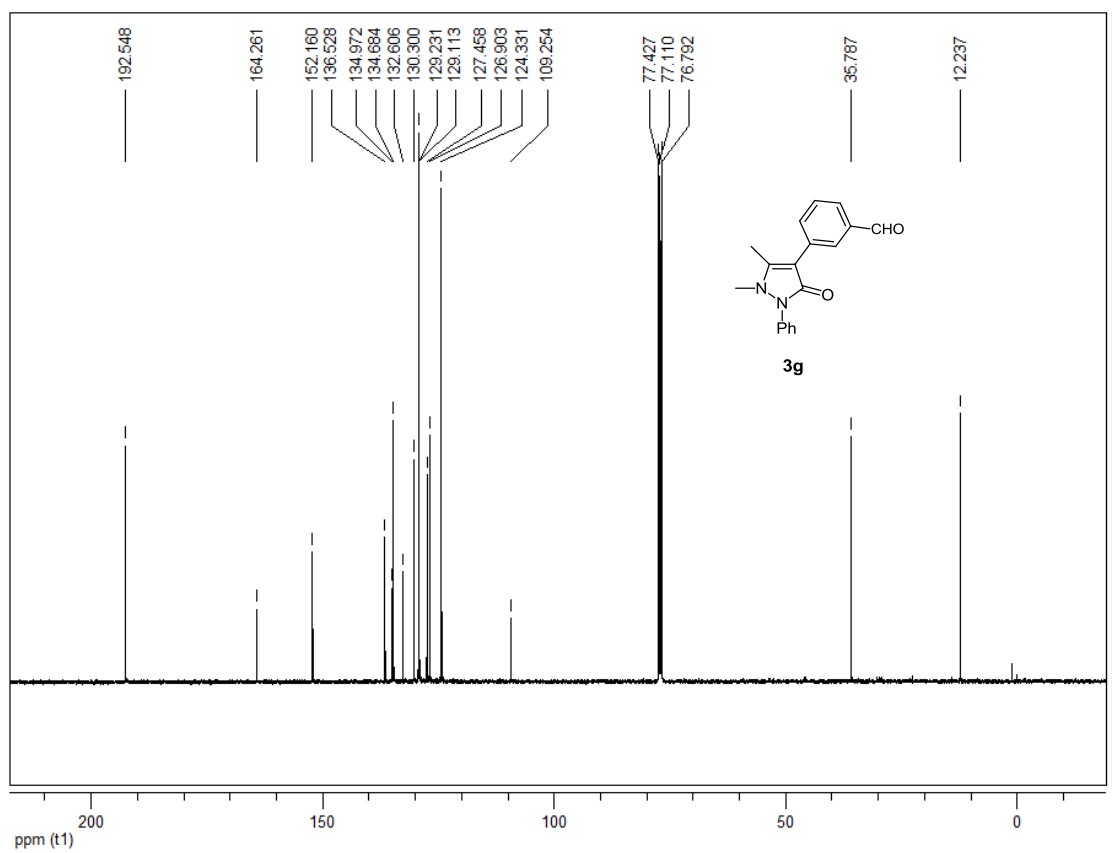

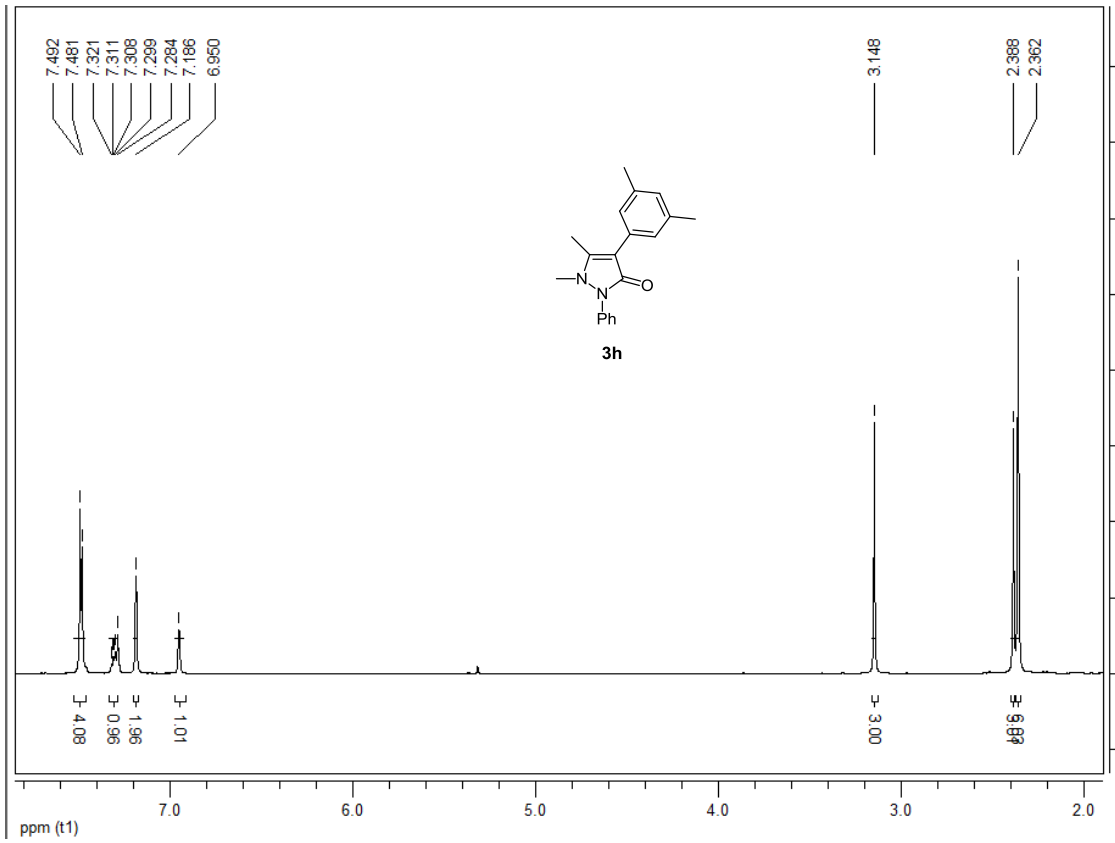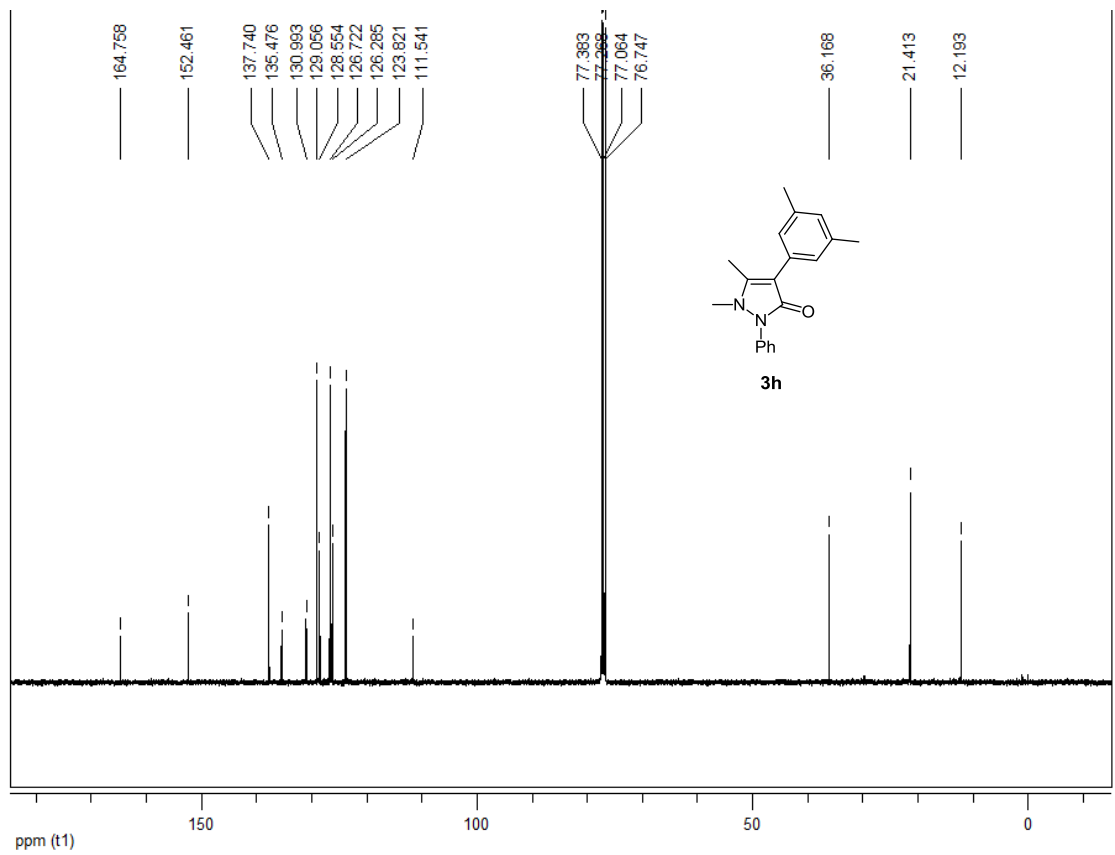

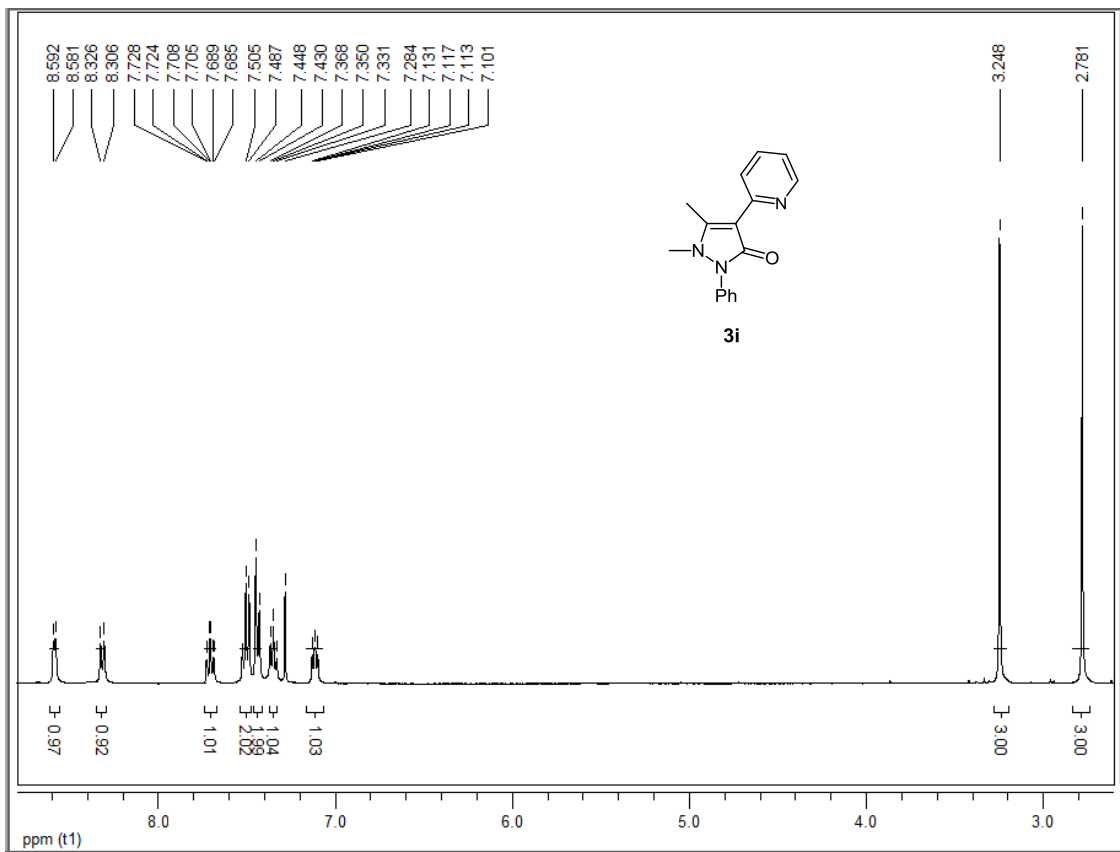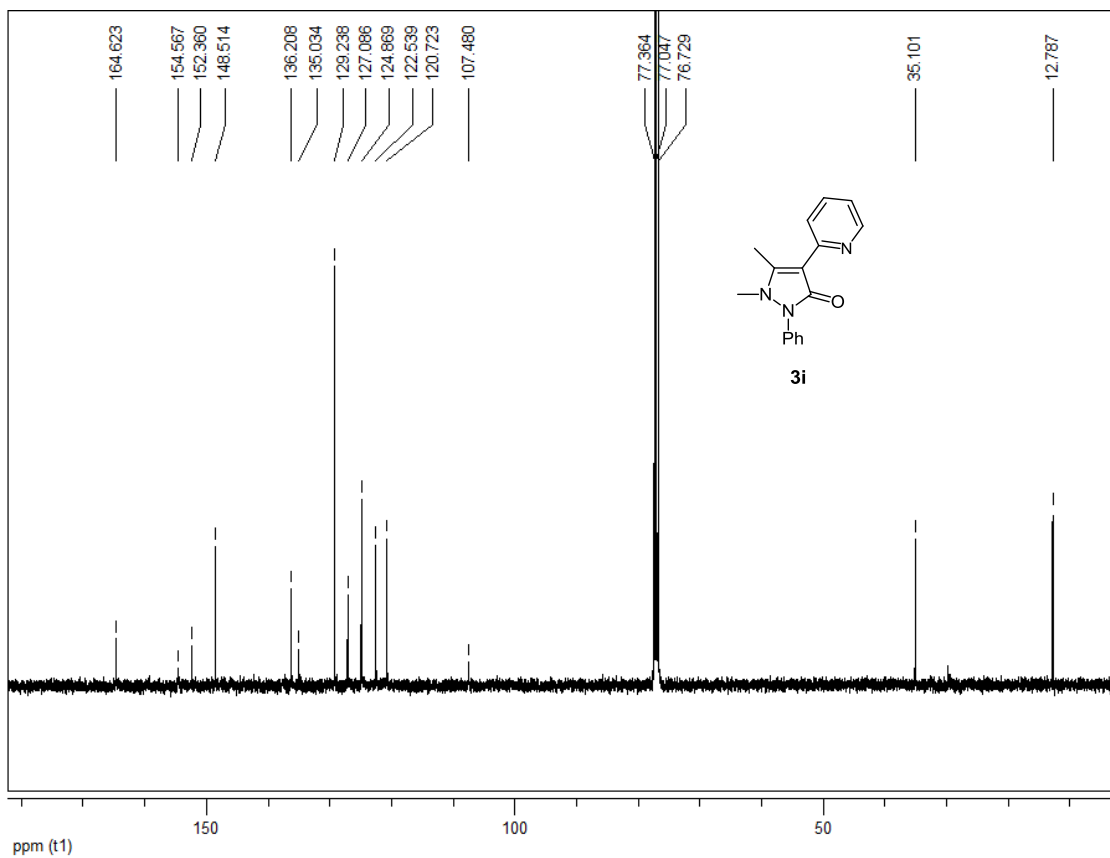



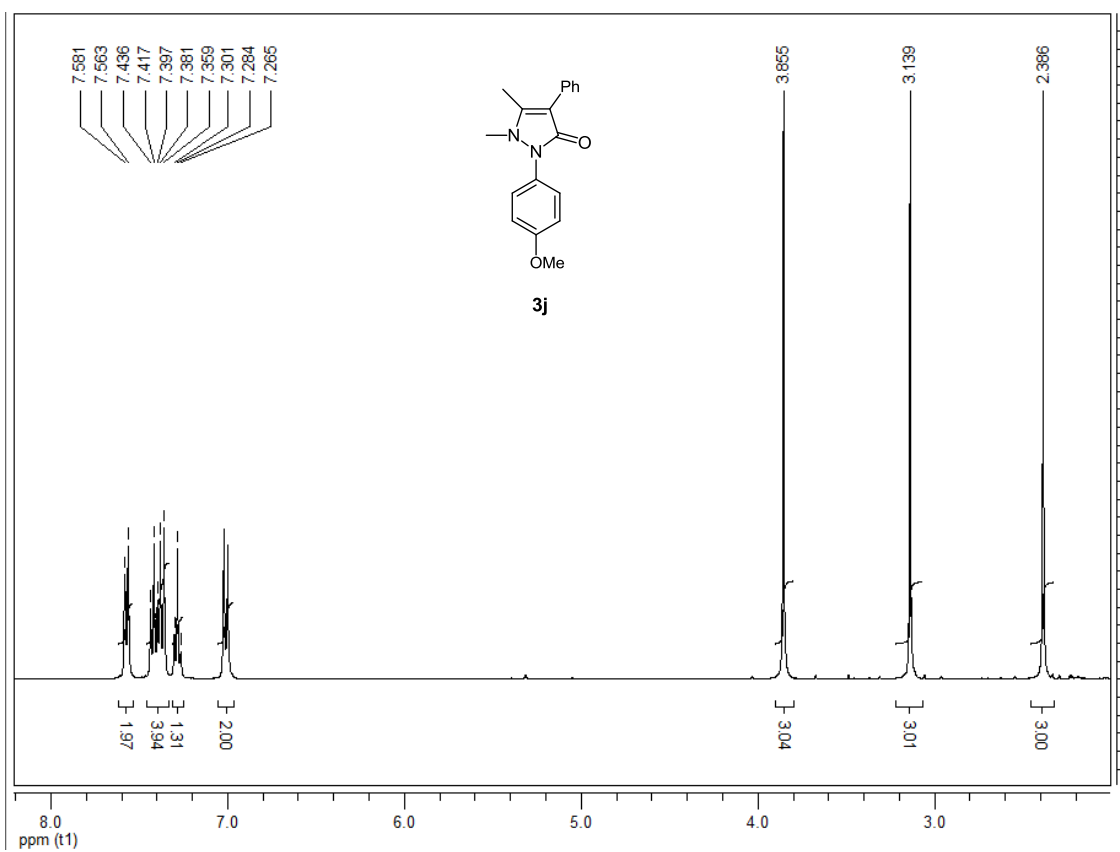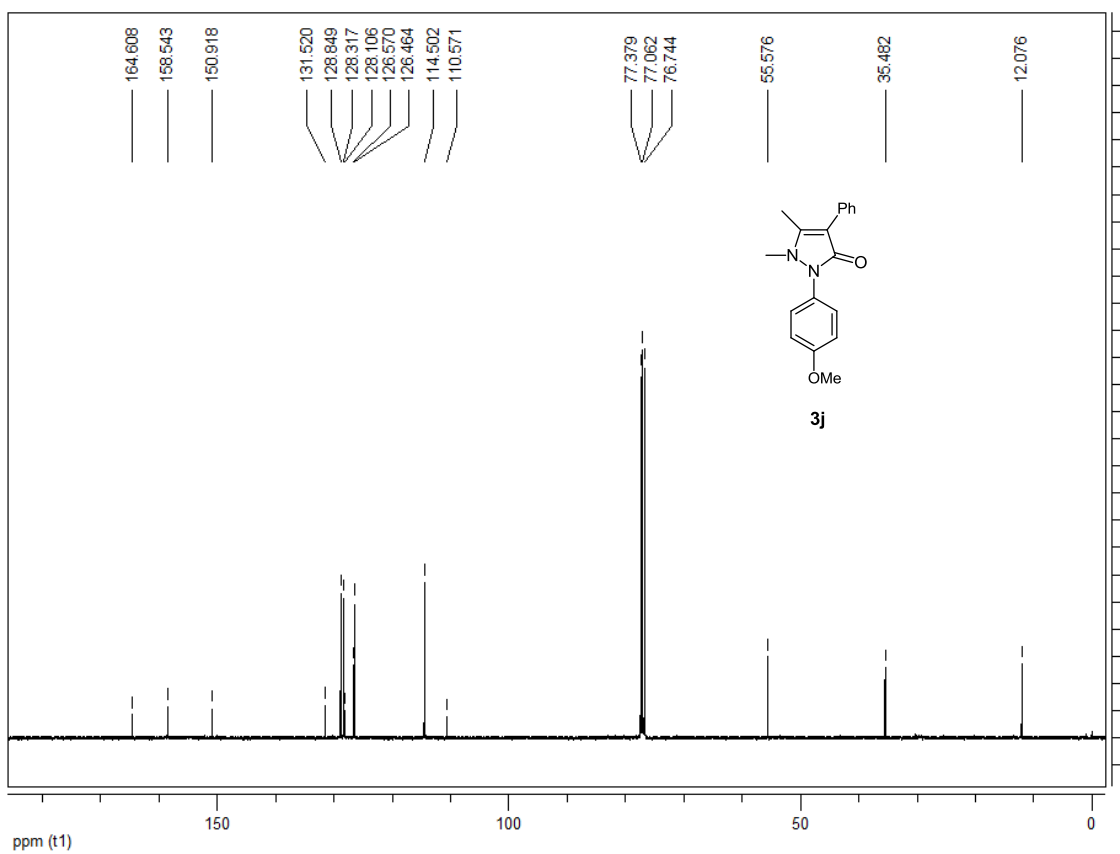



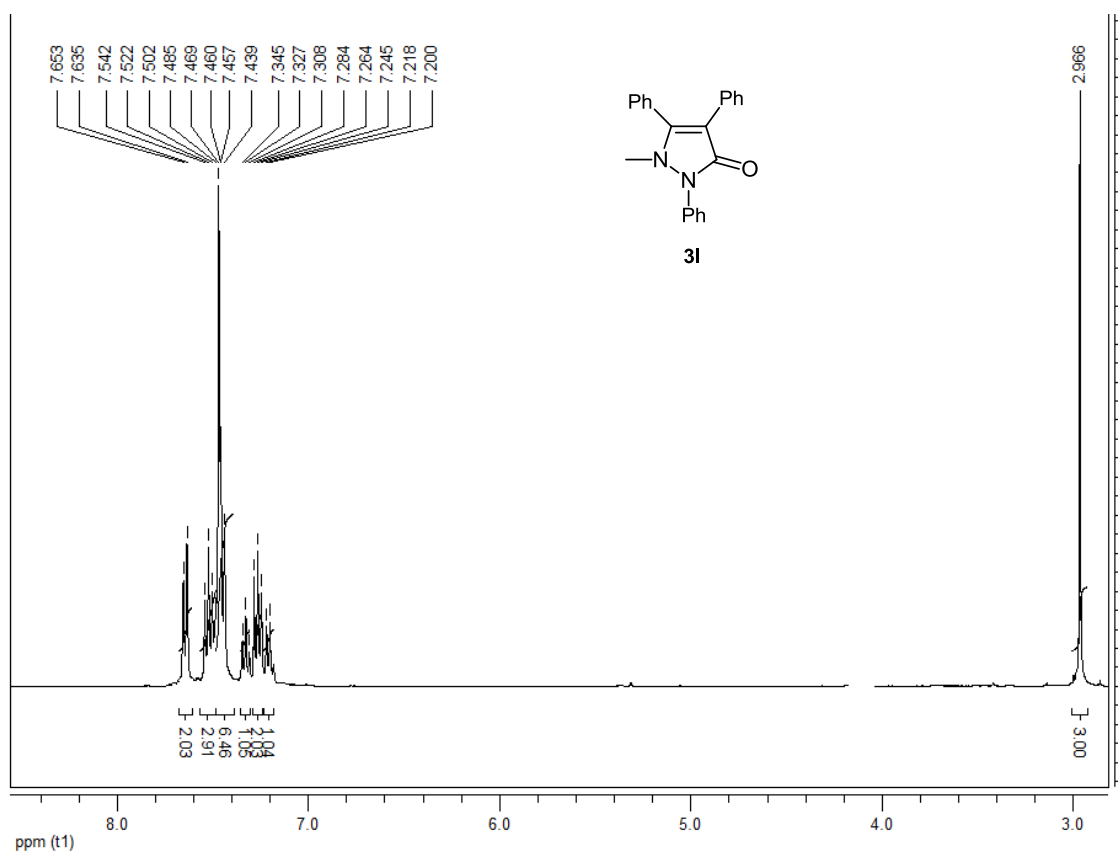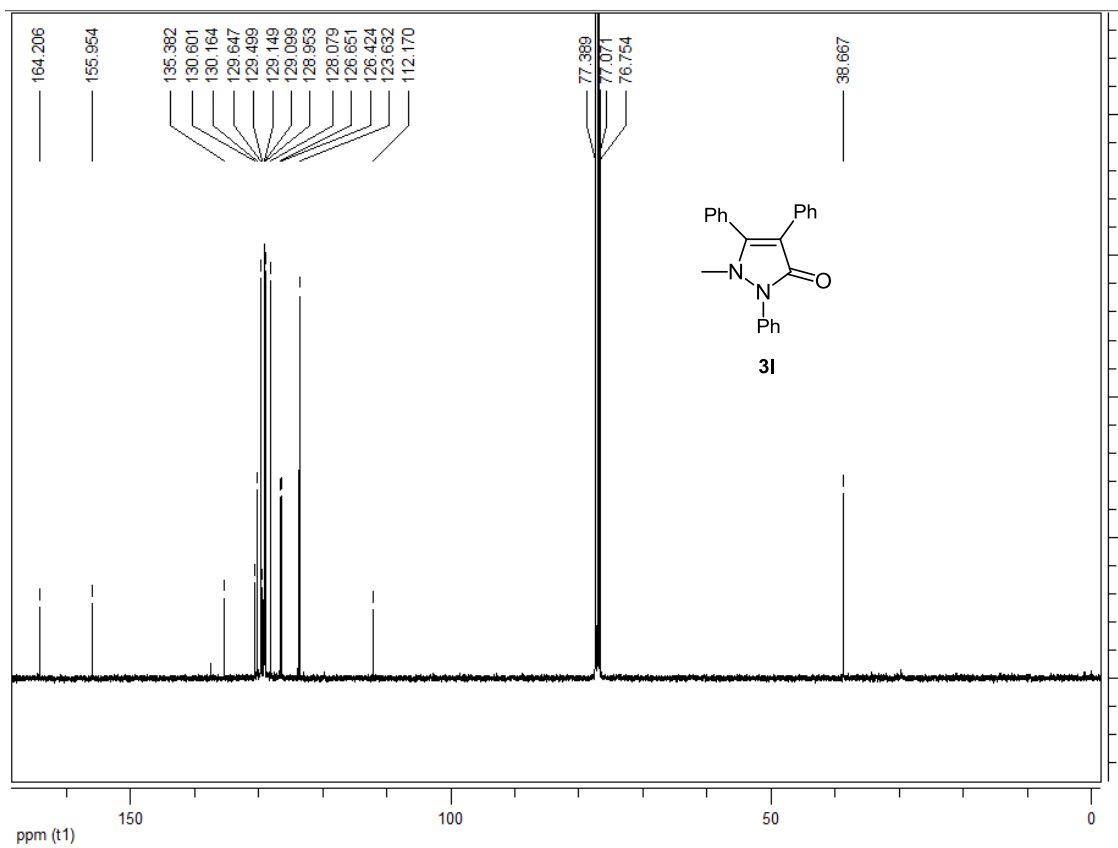

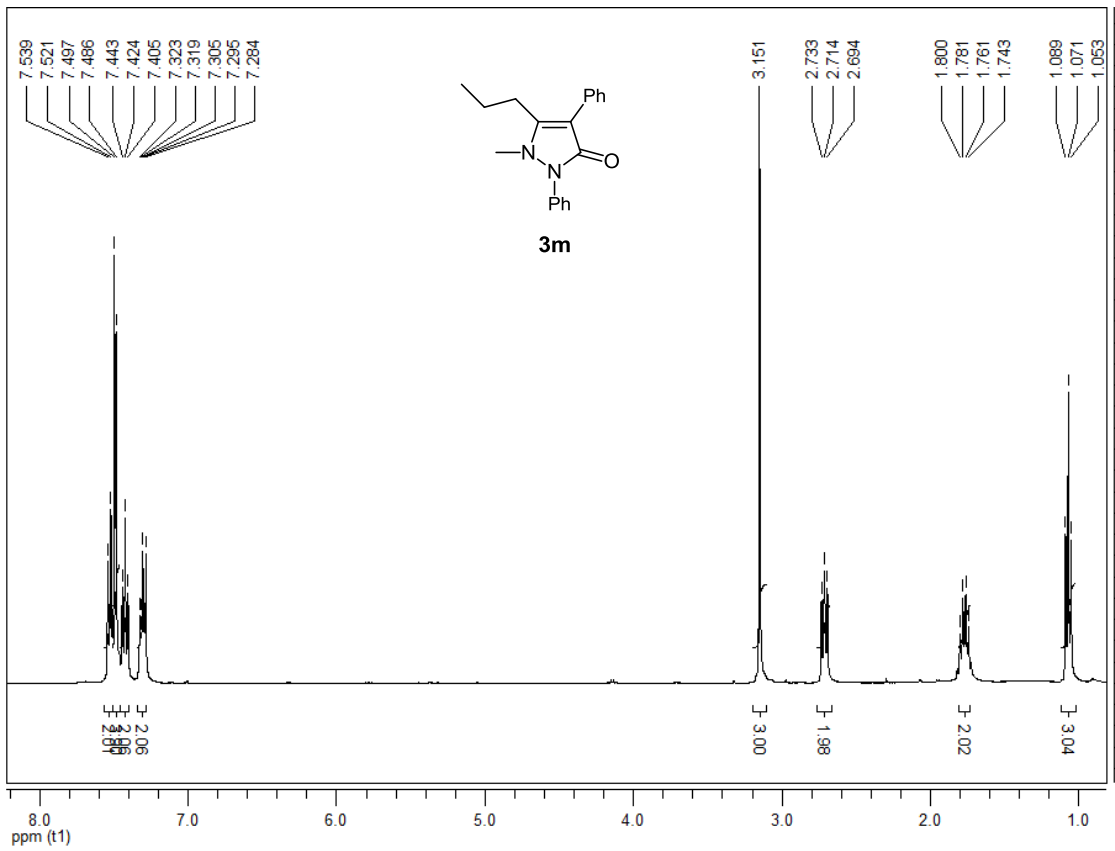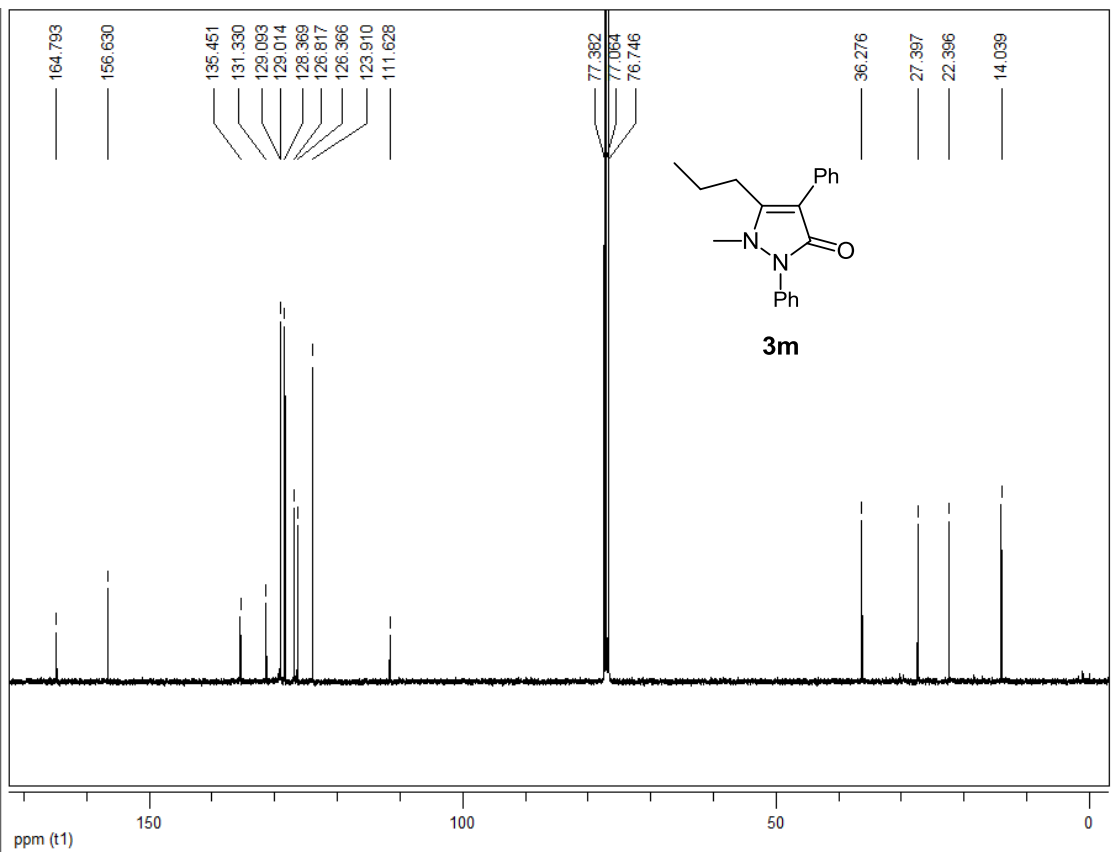

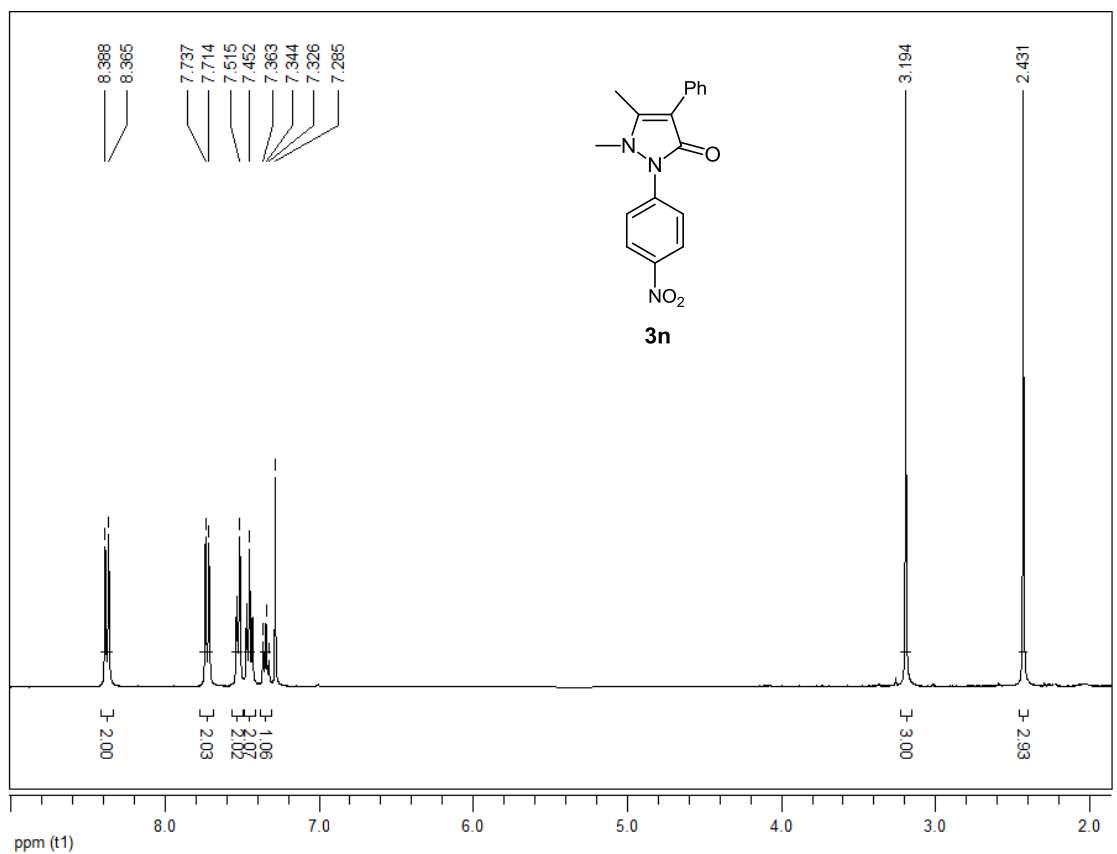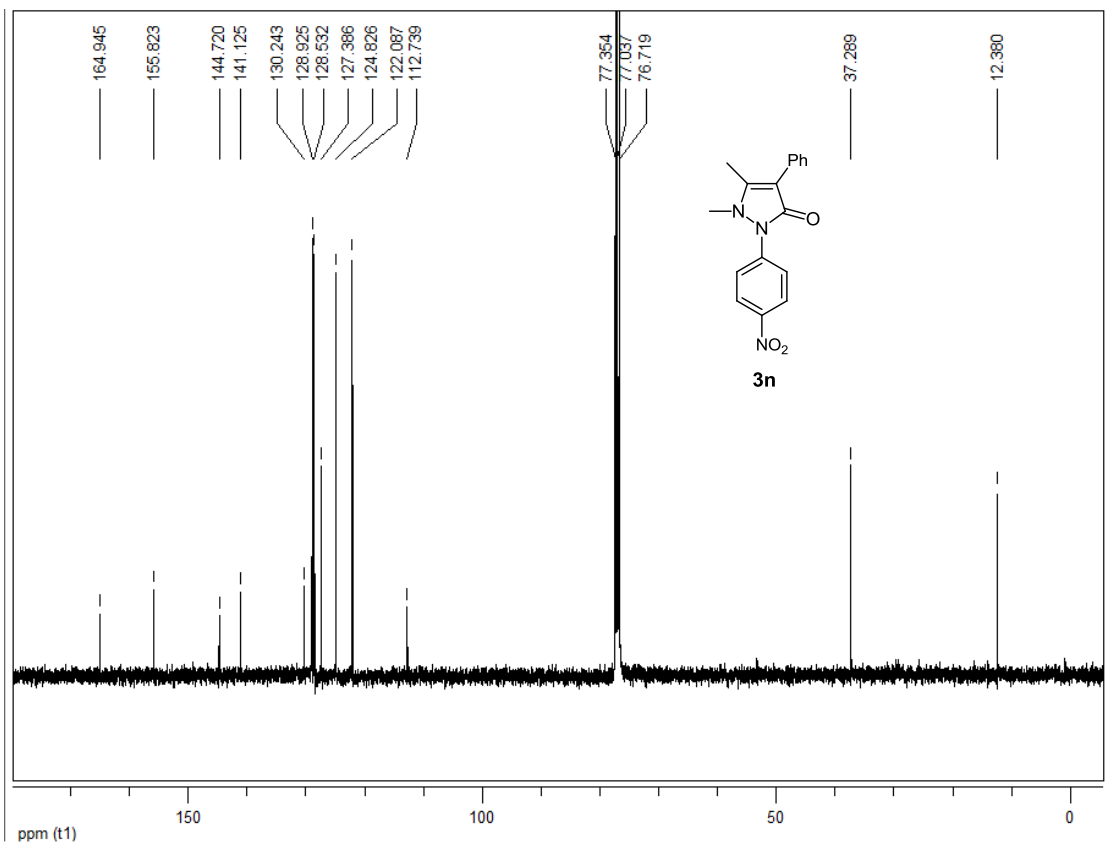

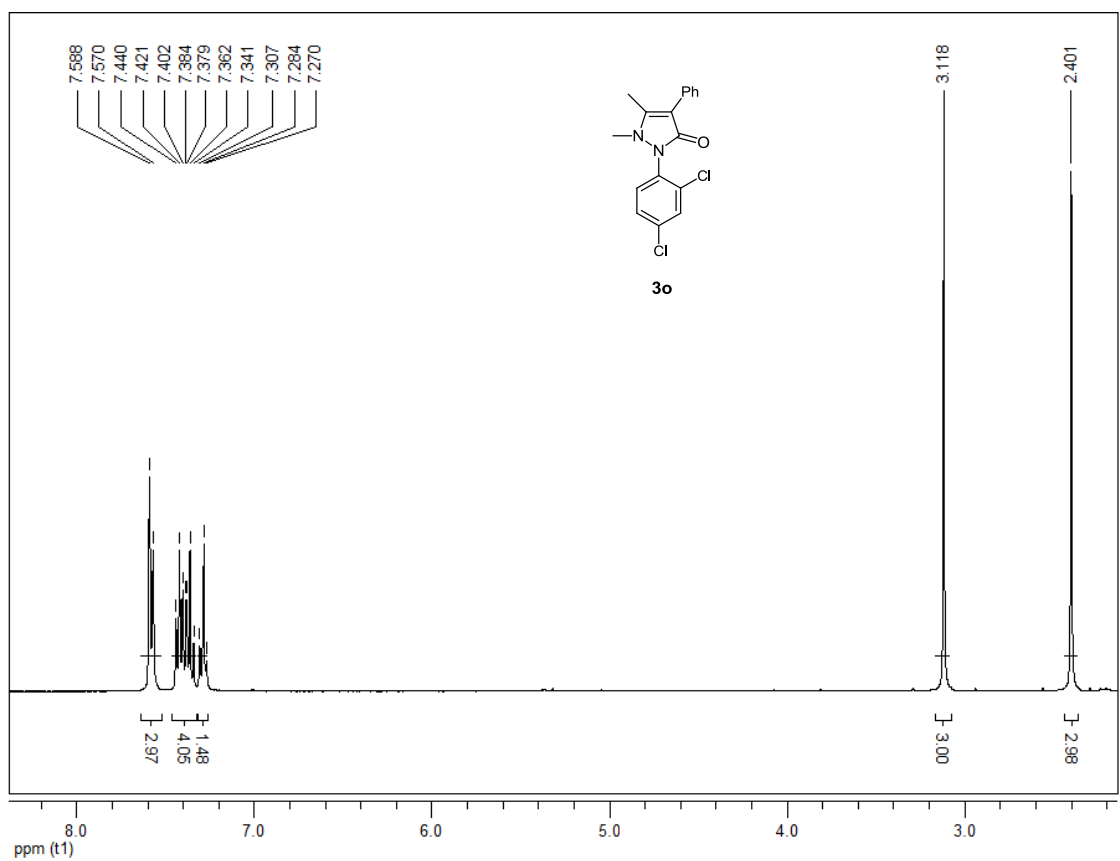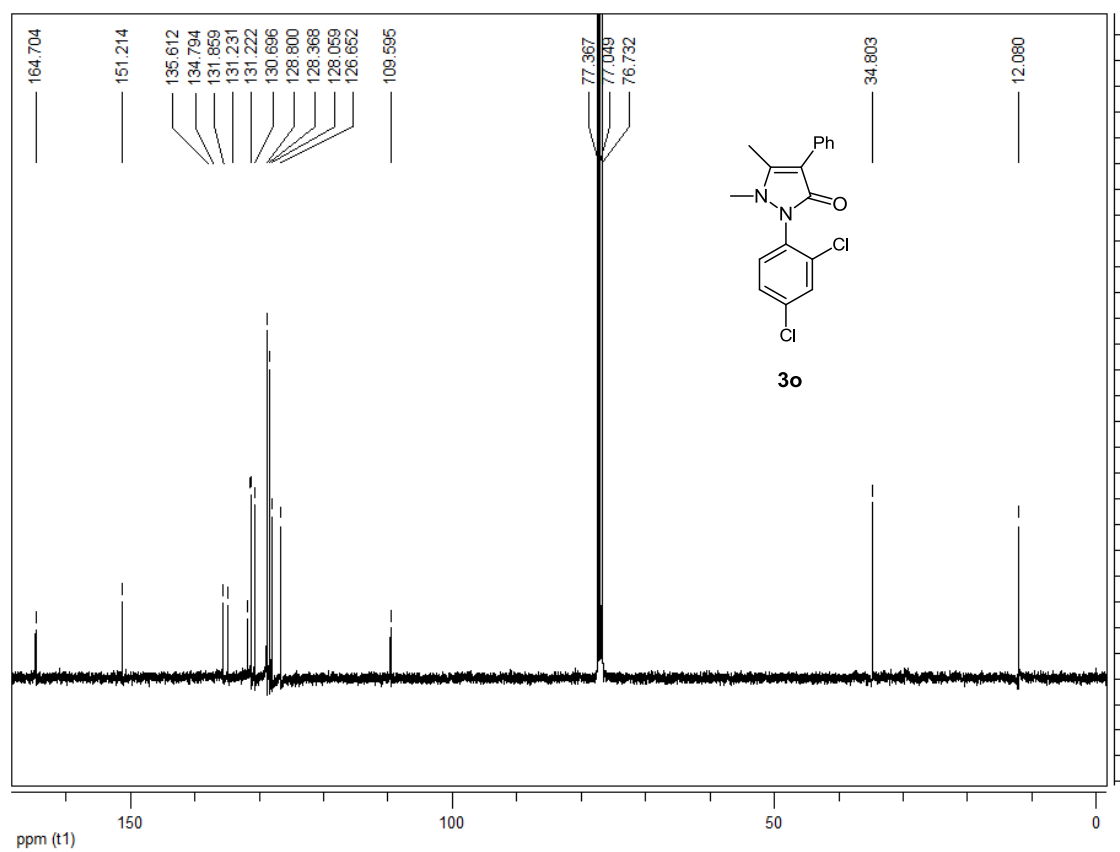

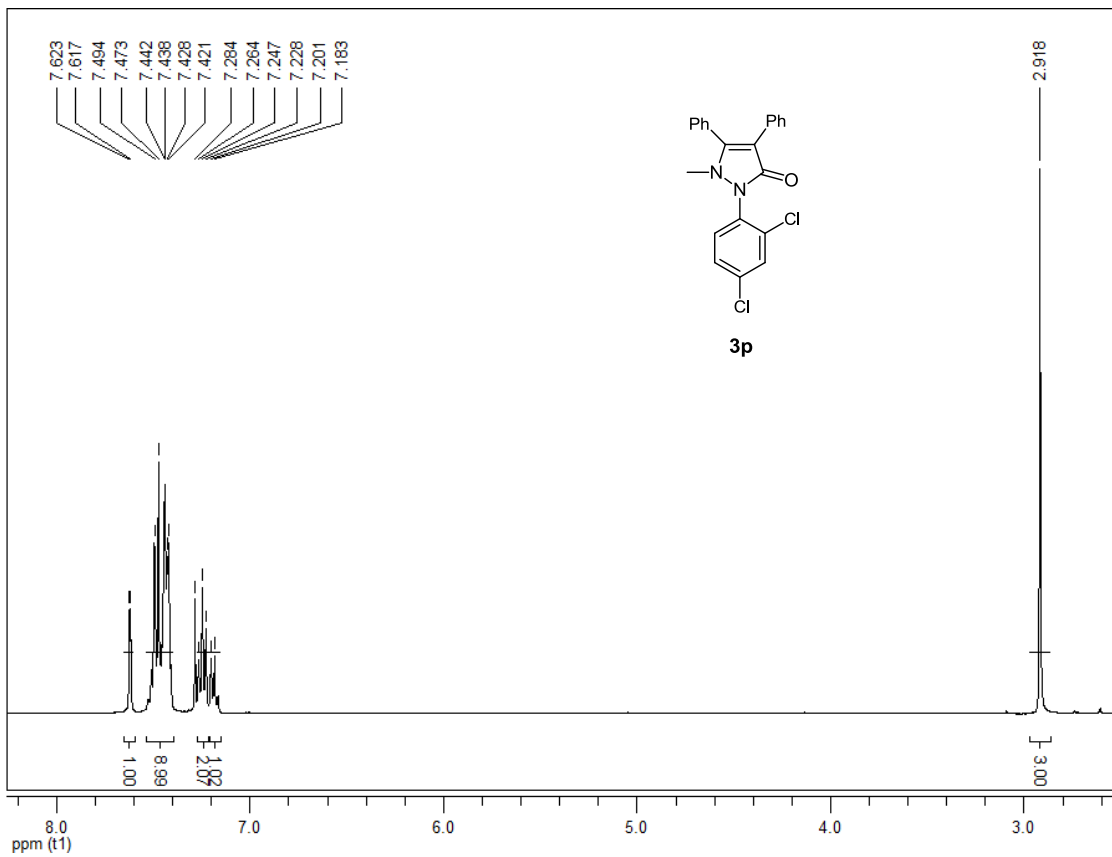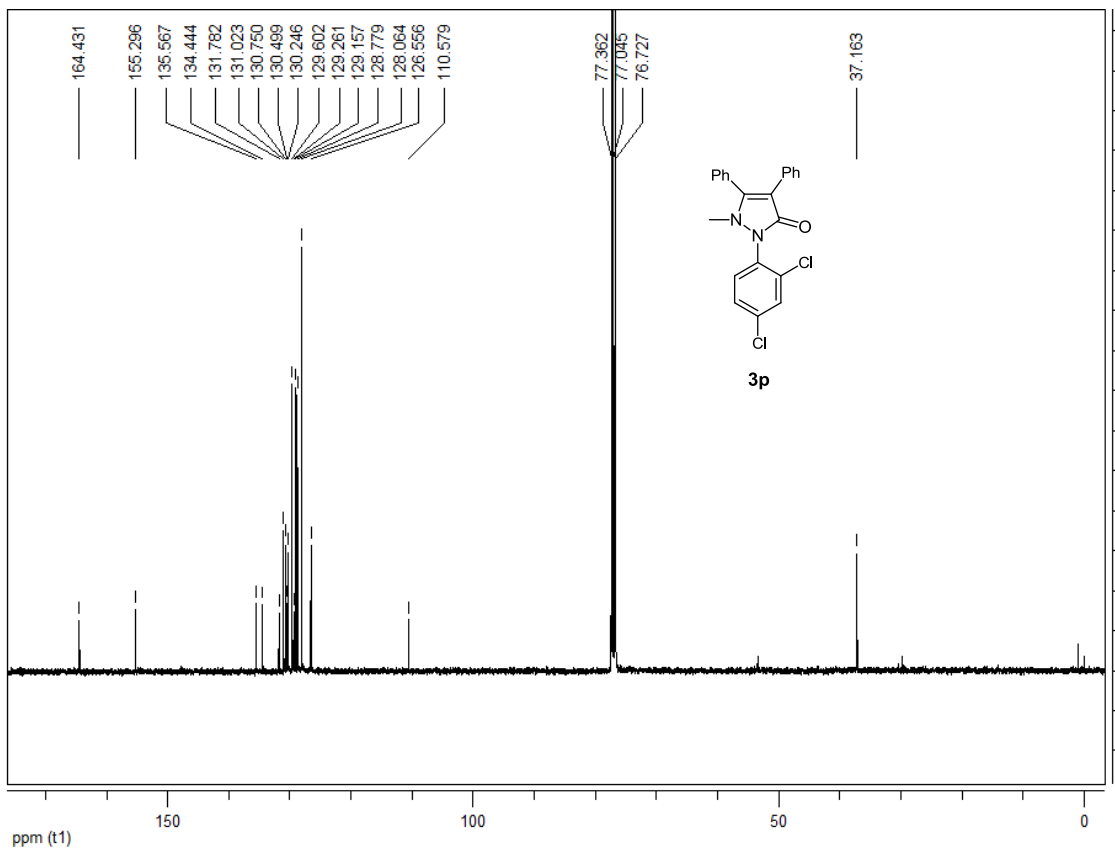

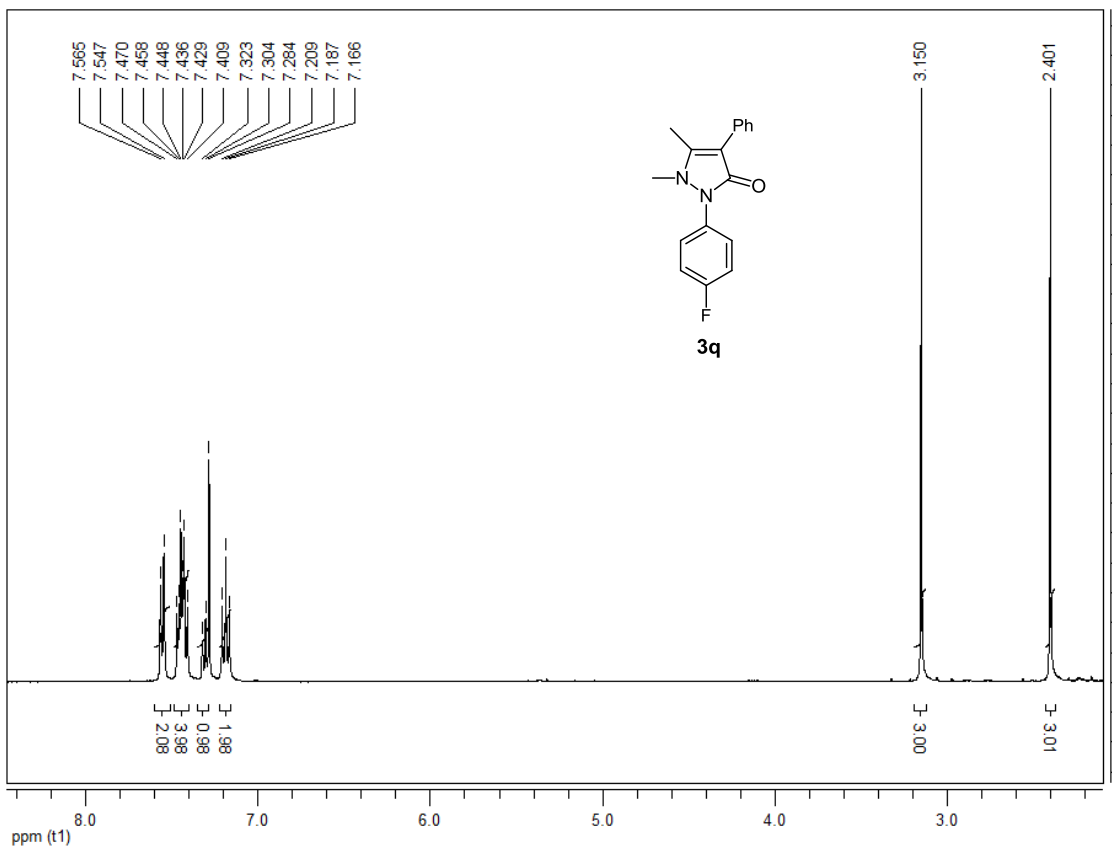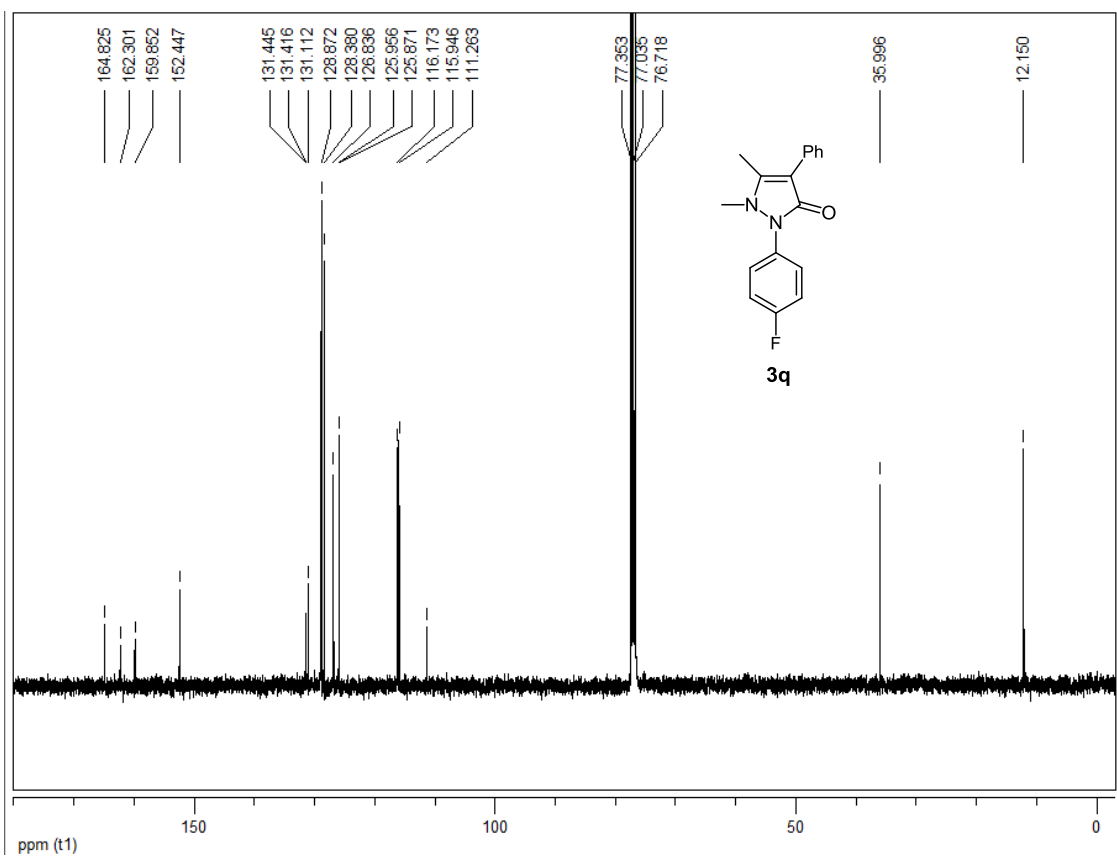



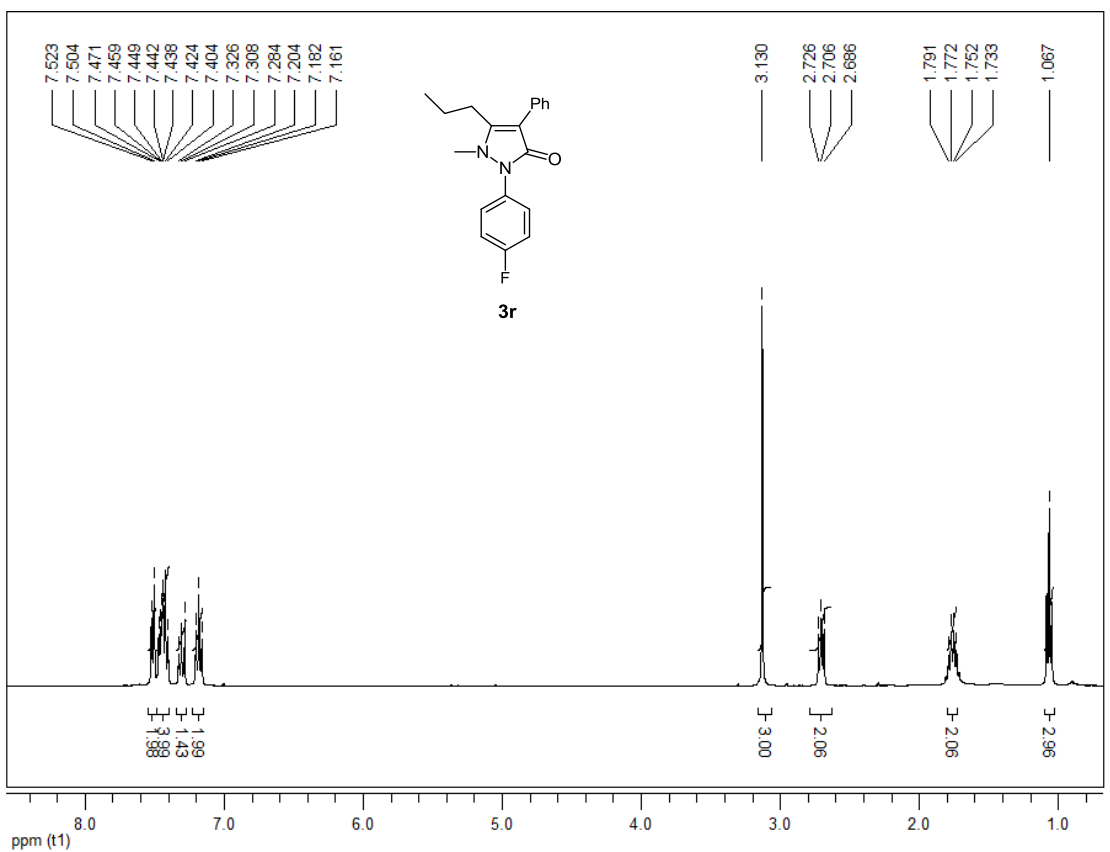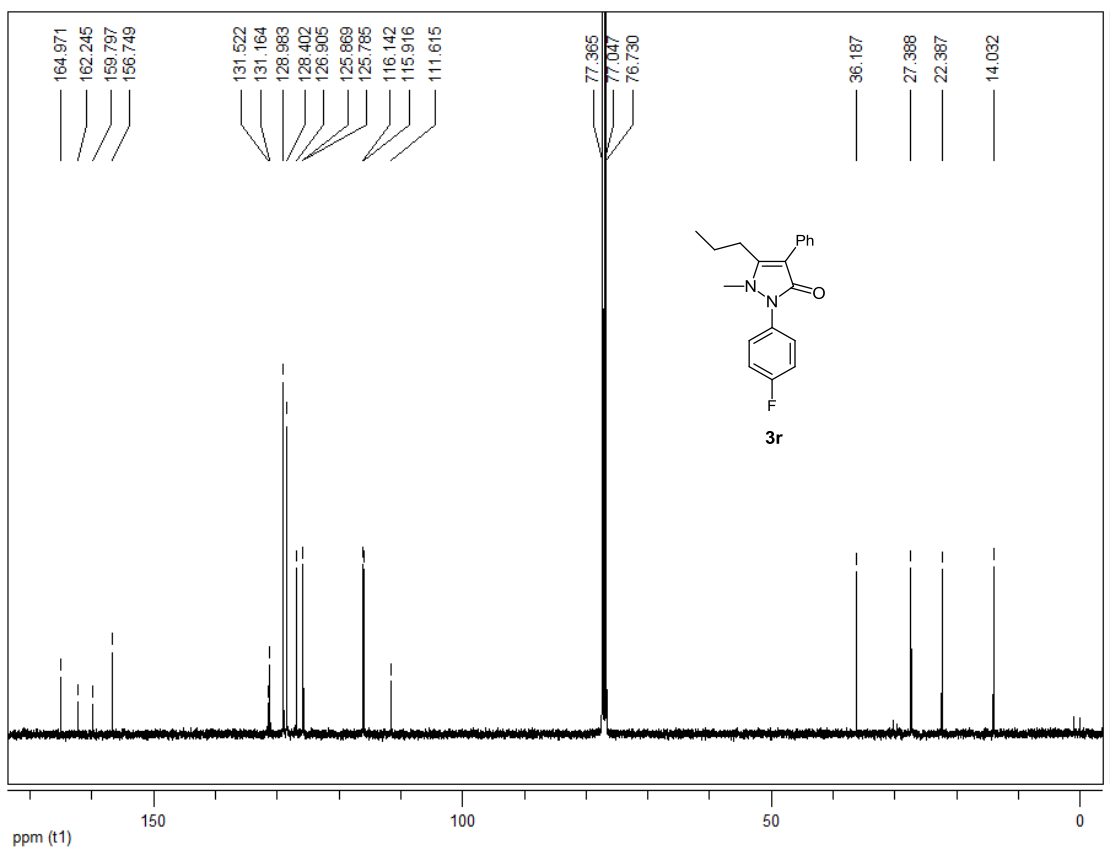

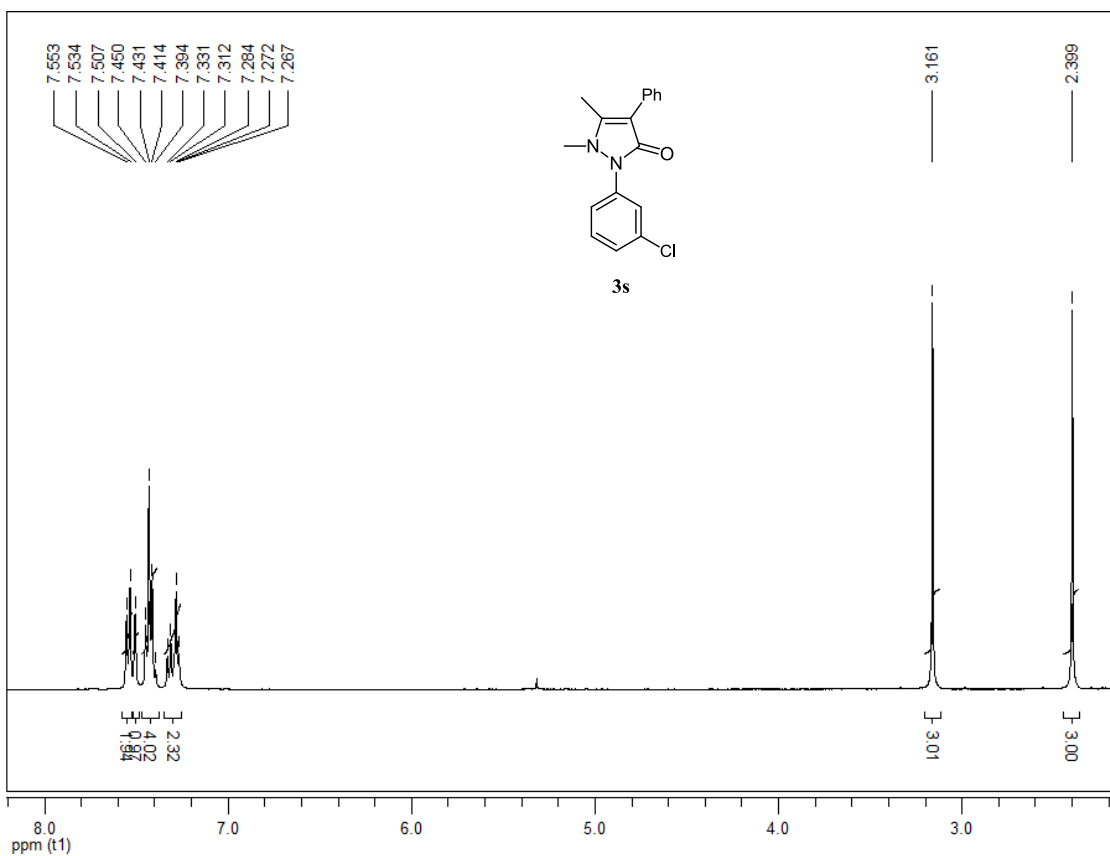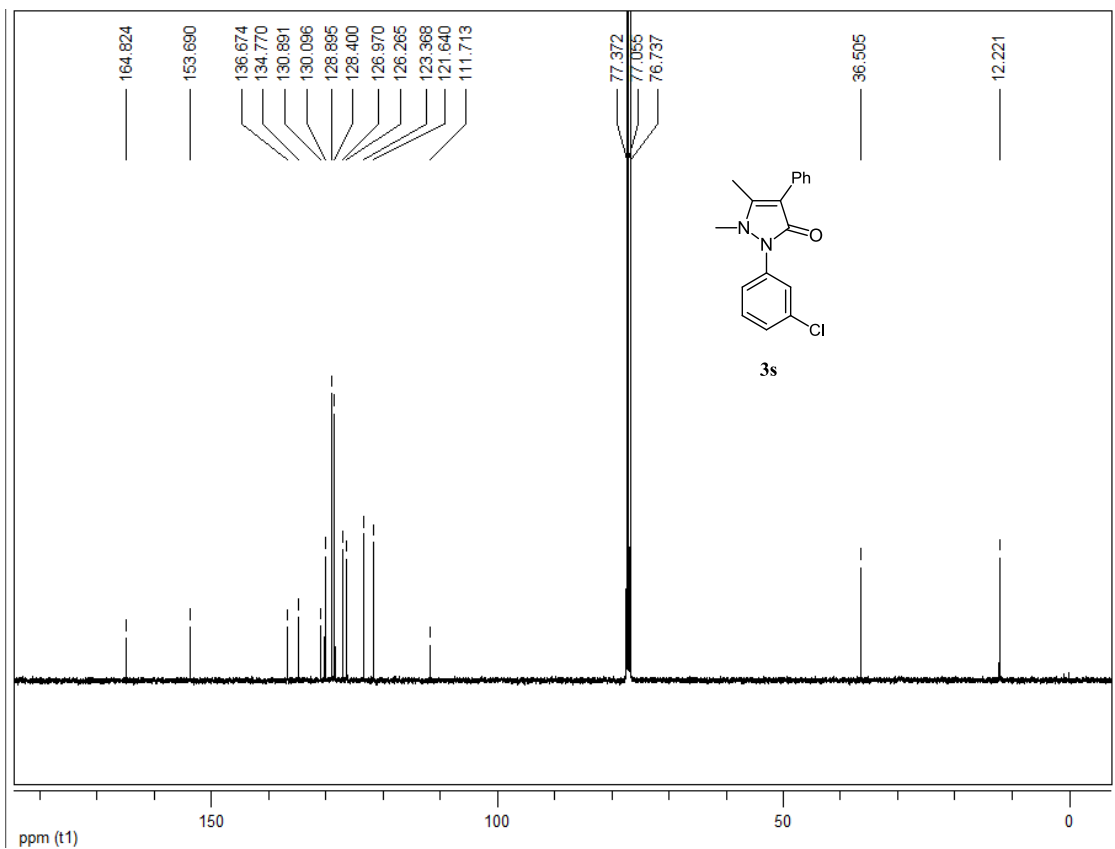

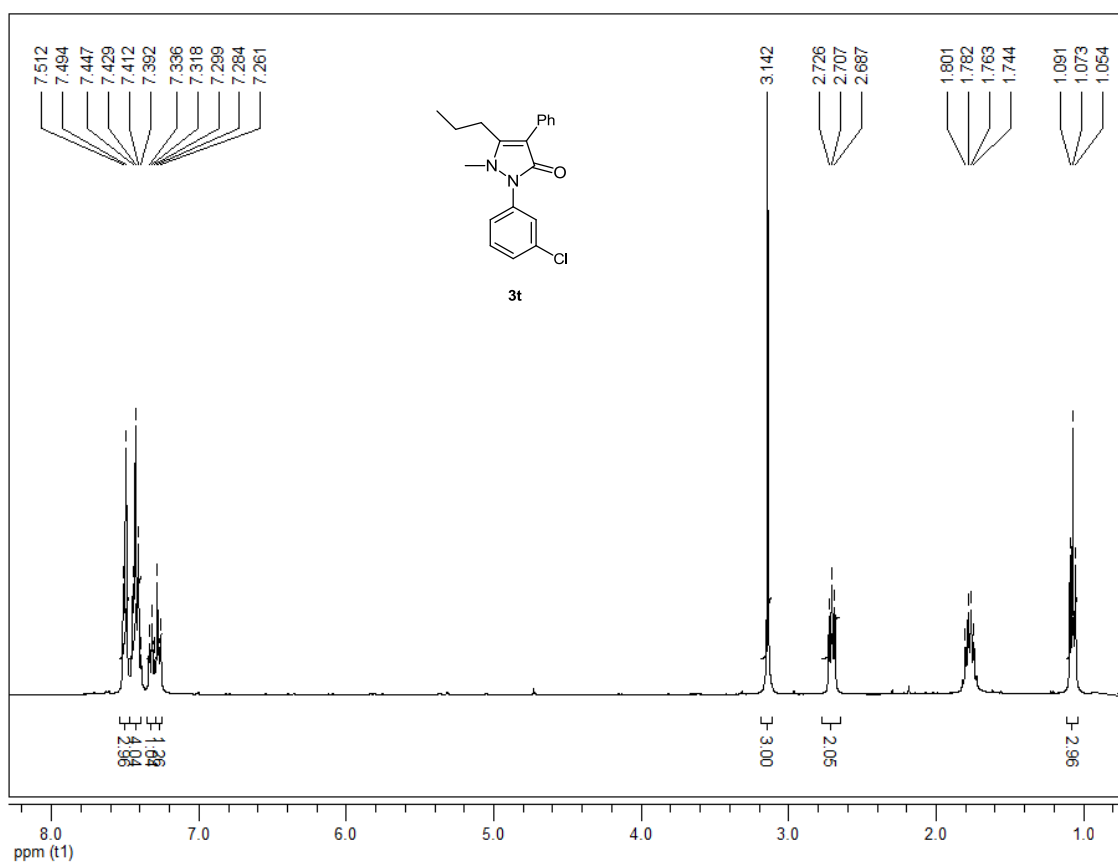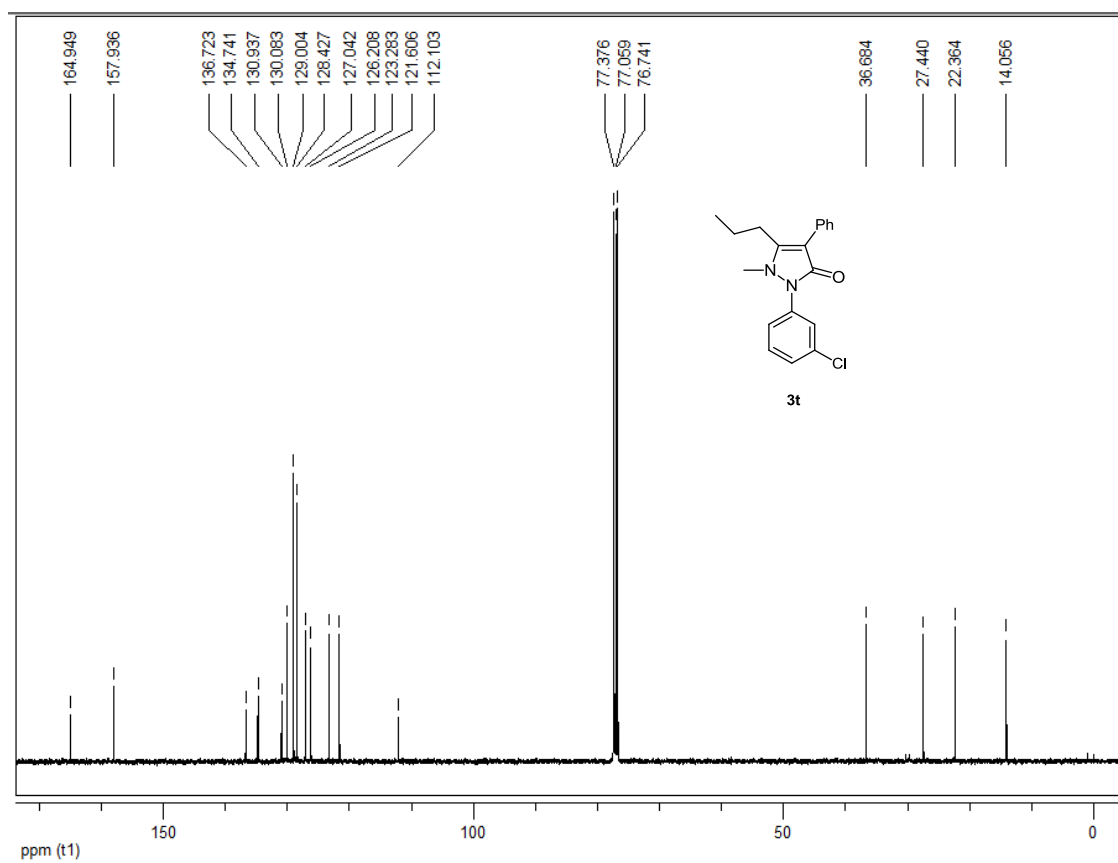

Supplement: Additional file 1 [file 1860-5397-9-240-S1.pdf]
